# Supplementary material for: Identification of an early subset of cerebellar nuclei neurons in mice
Source: eLife journal article supplement (doi:10.7554/elife.93778), 2024-04-08
Supplement: fig3-data1 [file elife-93778-fig3-data1-v1.pdf]

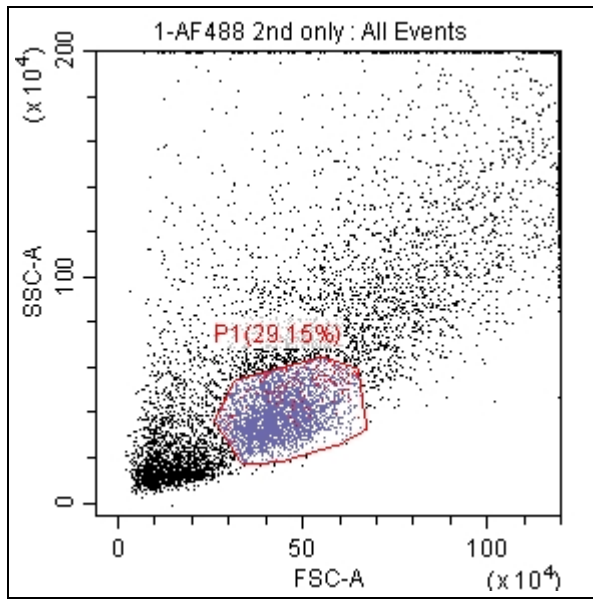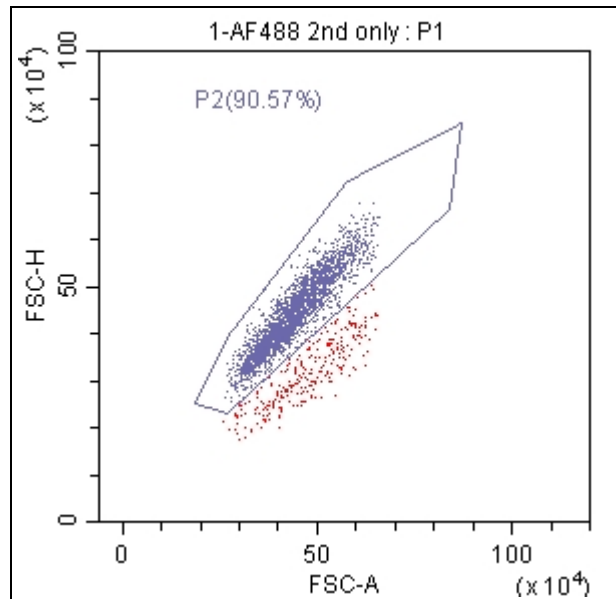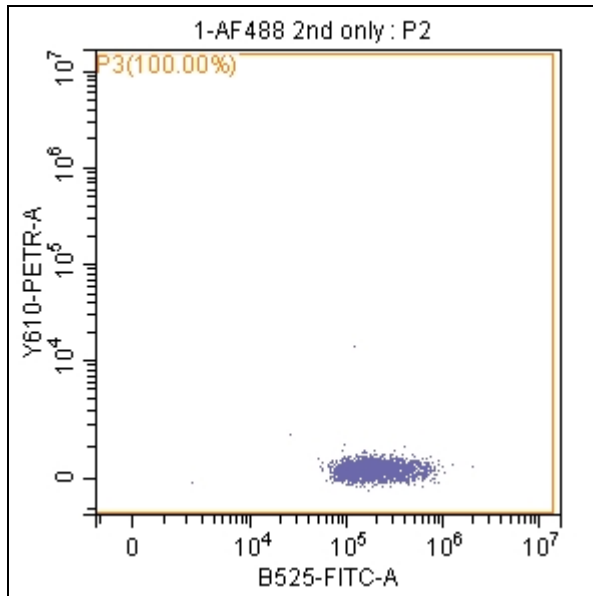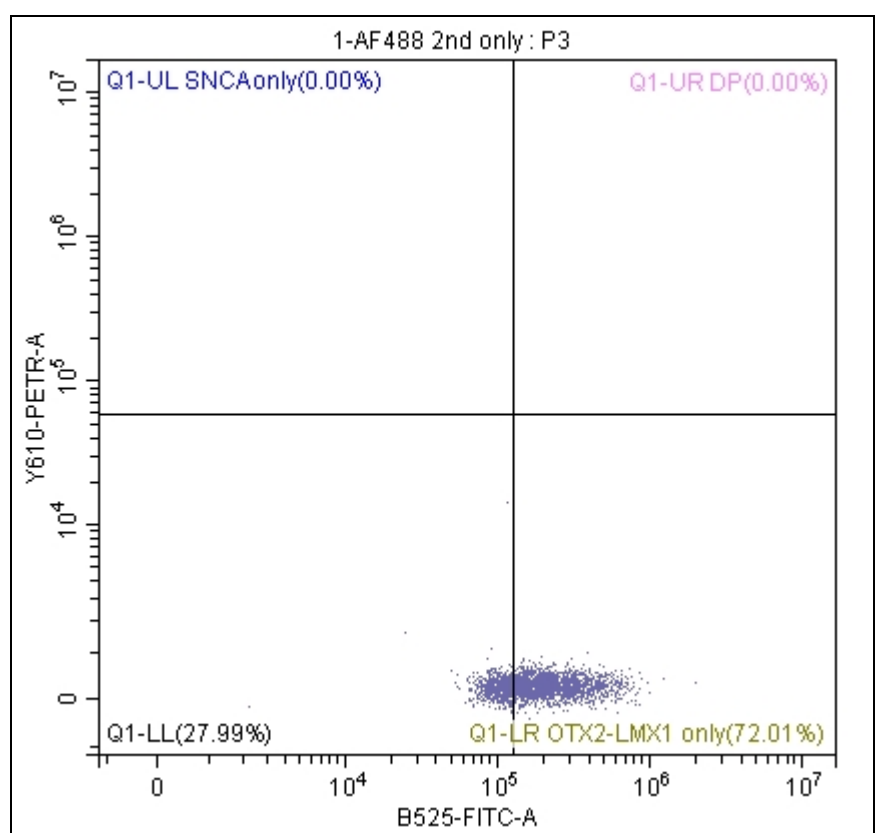

Tube Name: 1-AF488 2nd only

Sample ID:

| Population             | Events | % Total | % Parent |
|------------------------|--------|---------|----------|
| ▼ ● All Events         | 10000  | 100.00% | 100.00%  |
| ▼ ● P1                 | 2915   | 29.15%  | 29.15%   |
| ▼ ● P2                 | 2640   | 26.40%  | 90.57%   |
| ▼ ● P3                 | 2640   | 26.40%  | 100.00%  |
| ● Q1-UR DP             | 0      | 0.00%   | 0.00%    |
| ● Q1-UL SNCA only      | 0      | 0.00%   | 0.00%    |
| ⊗ Q1-LL                | 739    | 7.39%   | 27.99%   |
| ● Q1-LR OTX2-LMX1 only | 1901   | 19.01%  | 72.01%   |

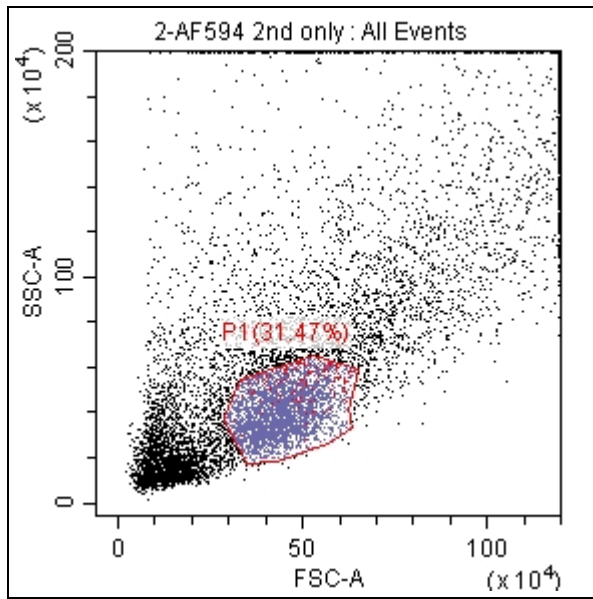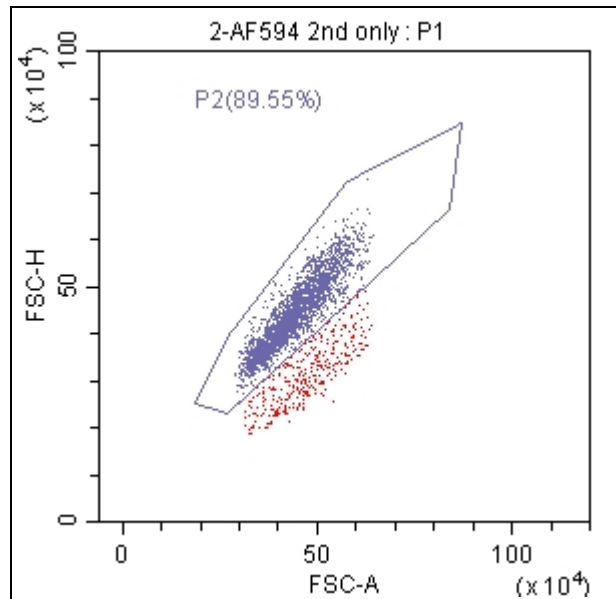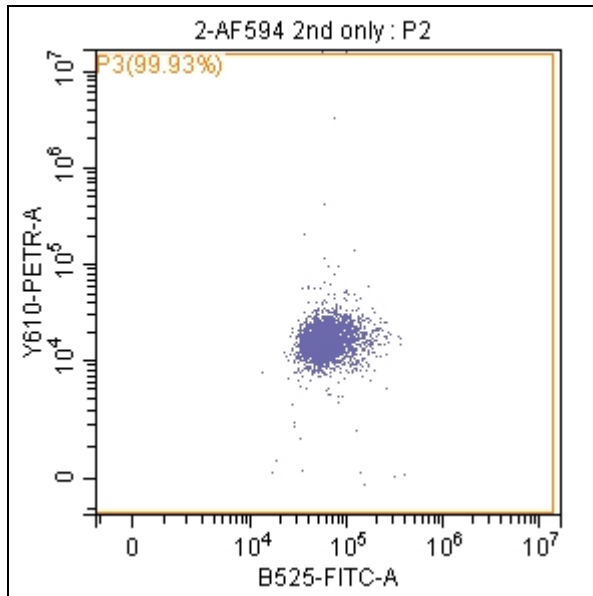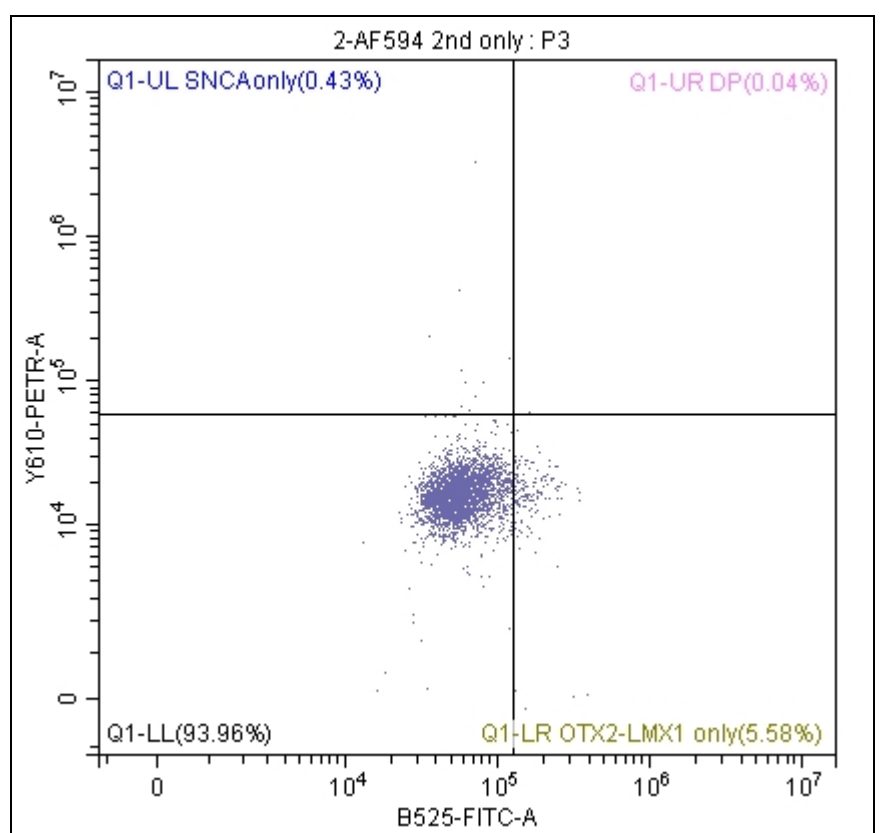

Tube Name: 2-AF594 2nd only

Sample ID:

| Population             | Events | % Total | % Parent |
|------------------------|--------|---------|----------|
| ● All Events           | 10000  | 100.00% | 100.00%  |
| ● P1                   | 3147   | 31.47%  | 31.47%   |
| ● P2                   | 2818   | 28.18%  | 89.55%   |
| ● P3                   | 2816   | 28.16%  | 99.93%   |
| ● Q1-UR DP             | 1      | 0.01%   | 0.04%    |
| ● Q1-UL SNCA only      | 12     | 0.12%   | 0.43%    |
| ⊗ Q1-LL                | 2646   | 26.46%  | 93.96%   |
| ● Q1-LR OTX2-LMX1 only | 157    | 1.57%   | 5.58%    |

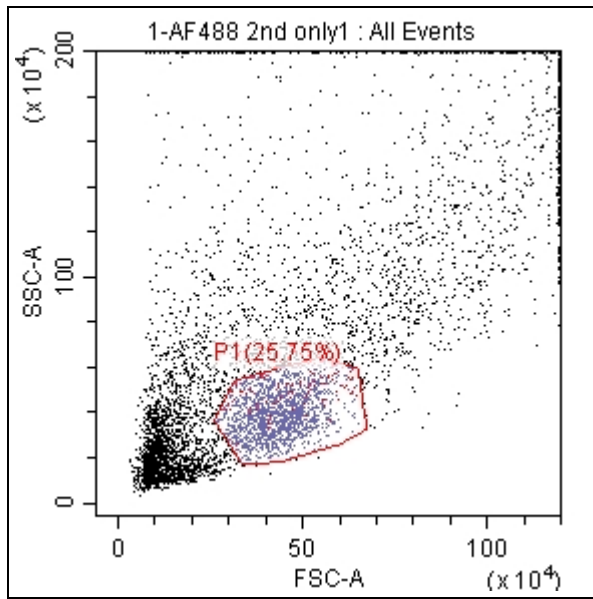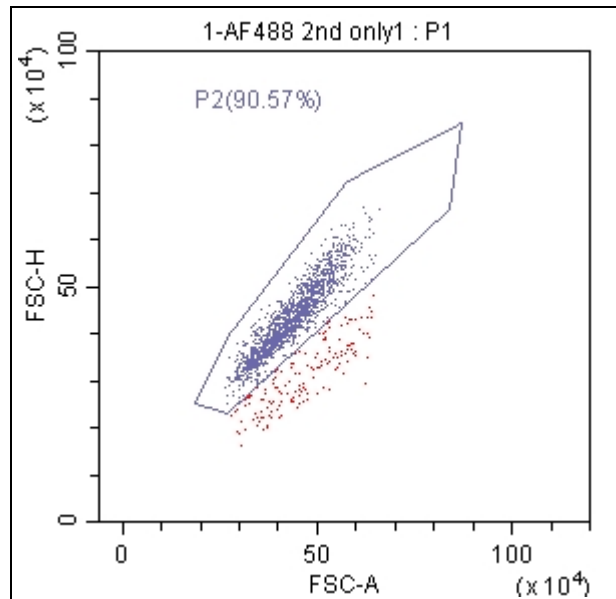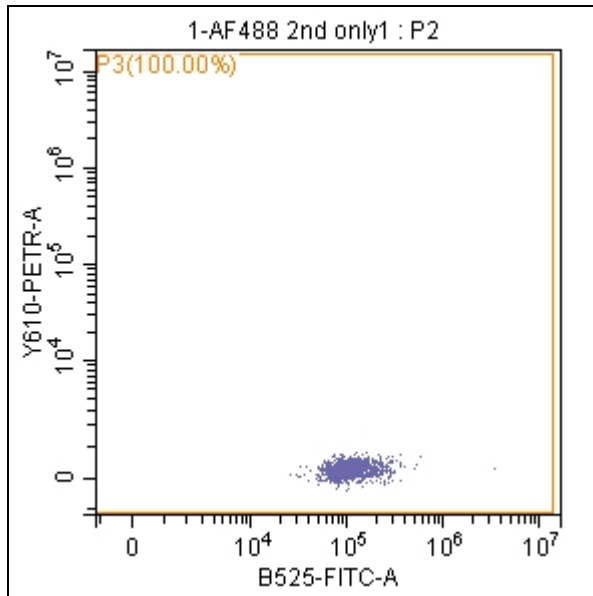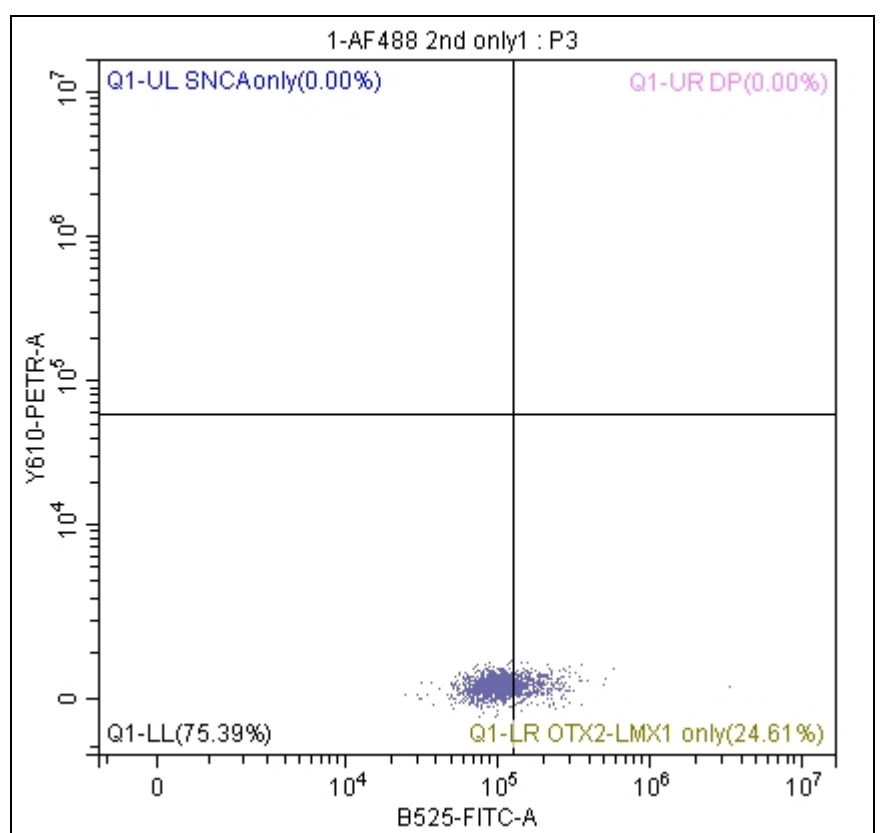

Tube Name: 1-AF488 2nd only1

Sample ID:

| Population             | Events | % Total | % Parent |
|------------------------|--------|---------|----------|
| ● All Events           | 6342   | 100.00% | 100.00%  |
| ● P1                   | 1633   | 25.75%  | 25.75%   |
| ● P2                   | 1479   | 23.32%  | 90.57%   |
| ● P3                   | 1479   | 23.32%  | 100.00%  |
| ● Q1-UR DP             | 0      | 0.00%   | 0.00%    |
| ● Q1-UL SNCA only      | 0      | 0.00%   | 0.00%    |
| ⊗ Q1-LL                | 1115   | 17.58%  | 75.39%   |
| ● Q1-LR OTX2-LMX1 only | 364    | 5.74%   | 24.61%   |

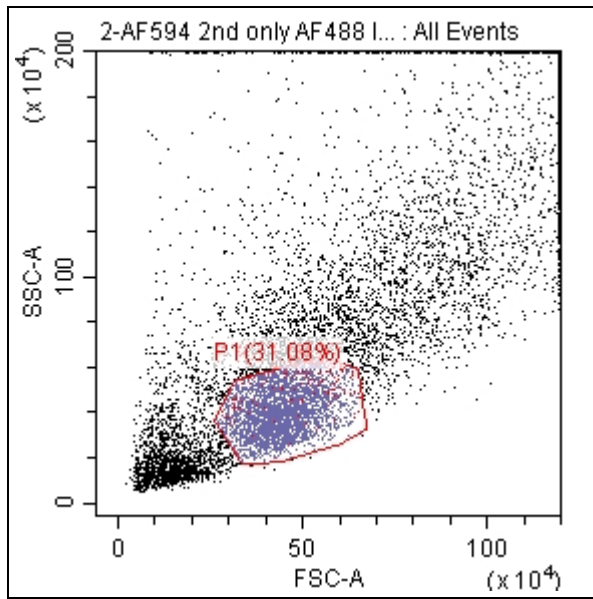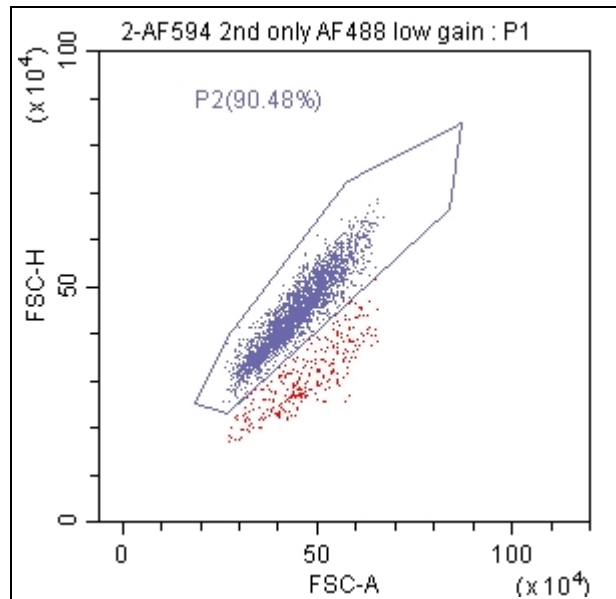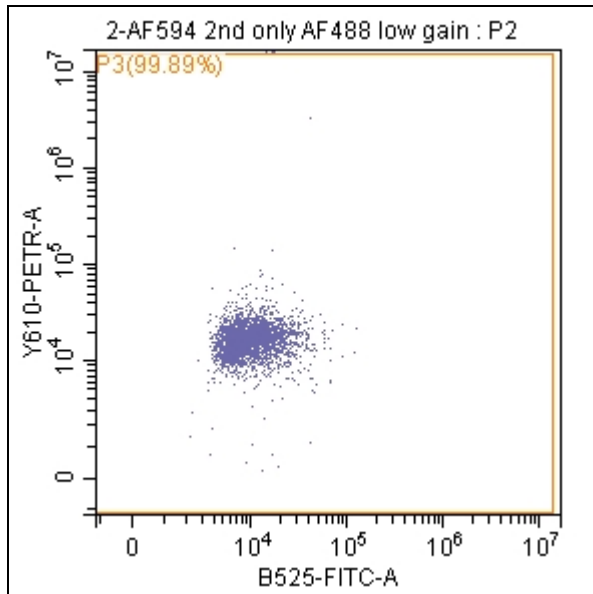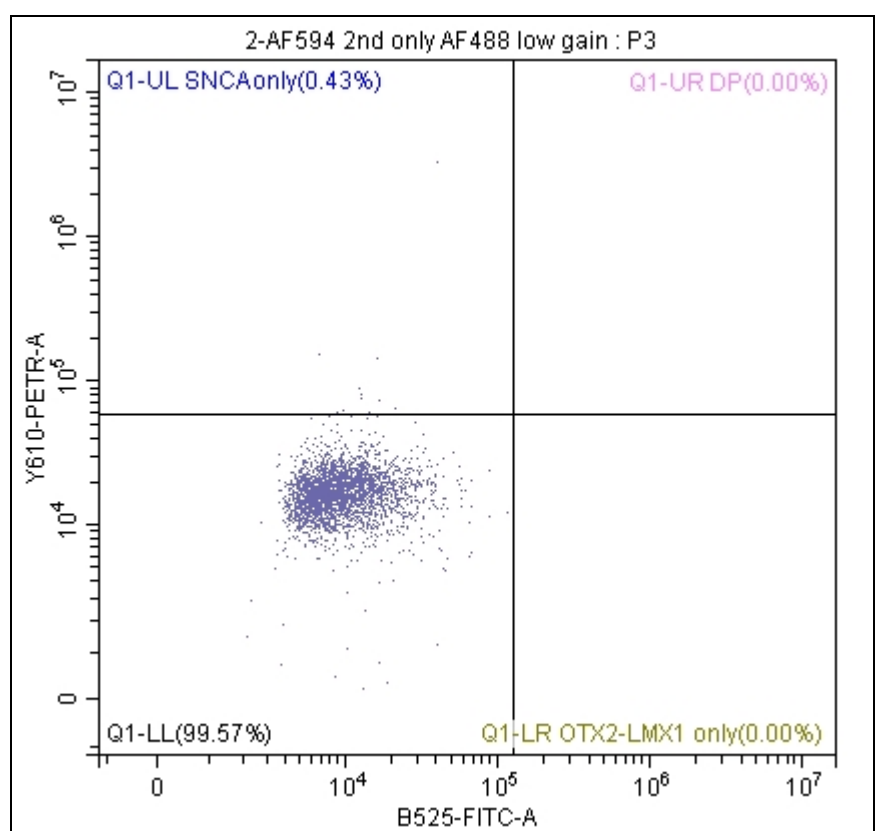

Tube Name: 2-AF594 2nd only AF488 low gain

Sample ID:

| Population             | Events | % Total | % Parent |
|------------------------|--------|---------|----------|
| ● All Events           | 10000  | 100.00% | 100.00%  |
| ● P1                   | 3108   | 31.08%  | 31.08%   |
| ● P2                   | 2812   | 28.12%  | 90.48%   |
| ● P3                   | 2809   | 28.09%  | 99.89%   |
| ● Q1-UR DP             | 0      | 0.00%   | 0.00%    |
| ● Q1-UL SNCA only      | 12     | 0.12%   | 0.43%    |
| ⊗ Q1-LL                | 2797   | 27.97%  | 99.57%   |
| ● Q1-LR OTX2-LMX1 only | 0      | 0.00%   | 0.00%    |

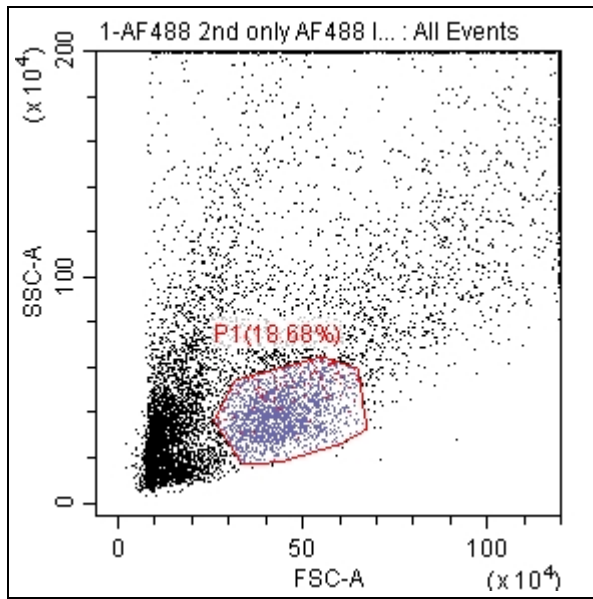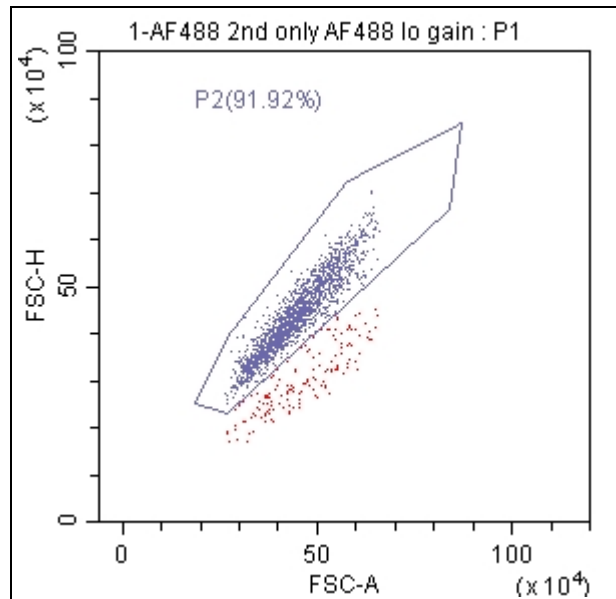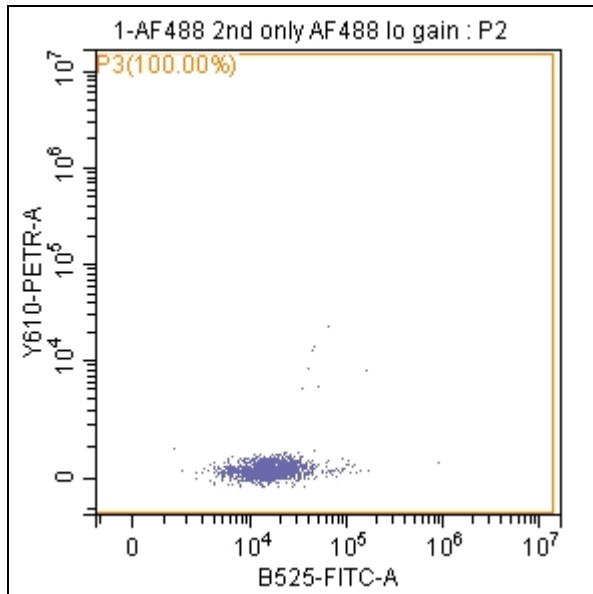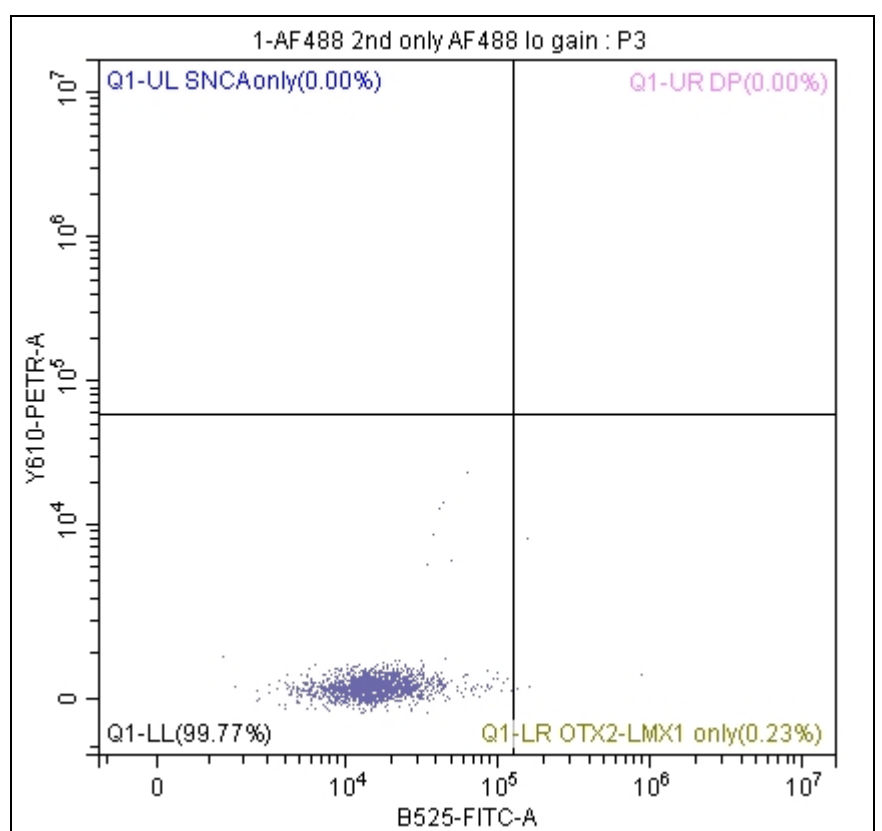

Tube Name: 1-AF488 2nd only AF488 lo gain

Sample ID:

| Population             | Events | % Total | % Parent |
|------------------------|--------|---------|----------|
| ● All Events           | 10000  | 100.00% | 100.00%  |
| ● P1                   | 1868   | 18.68%  | 18.68%   |
| ● P2                   | 1717   | 17.17%  | 91.92%   |
| ● P3                   | 1717   | 17.17%  | 100.00%  |
| ● Q1-UR DP             | 0      | 0.00%   | 0.00%    |
| ● Q1-UL SNCA only      | 0      | 0.00%   | 0.00%    |
| ⊗ Q1-LL                | 1713   | 17.13%  | 99.77%   |
| ● Q1-LR OTX2-LMX1 only | 4      | 0.04%   | 0.23%    |

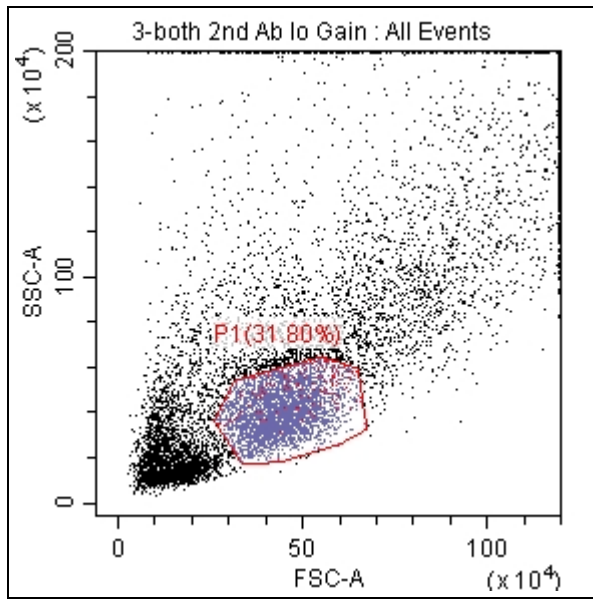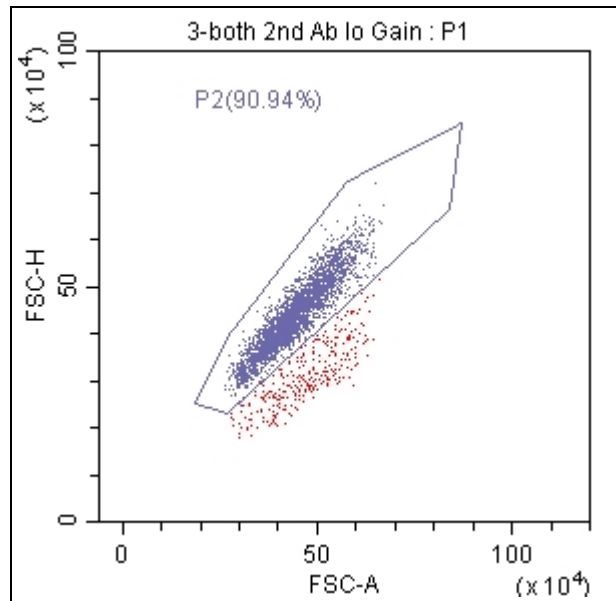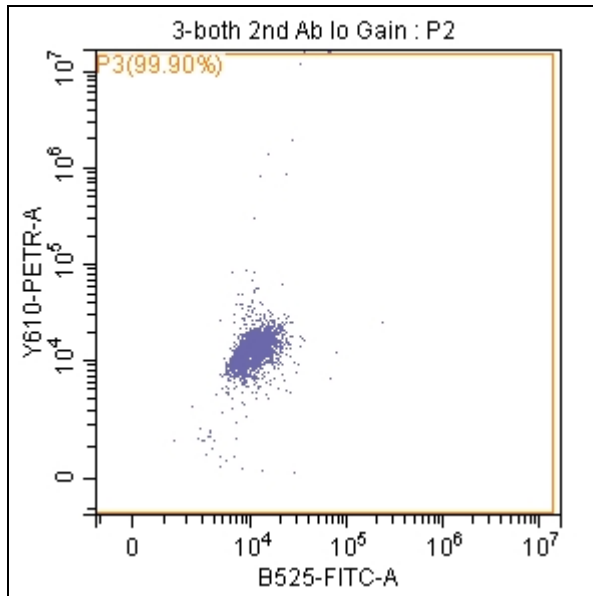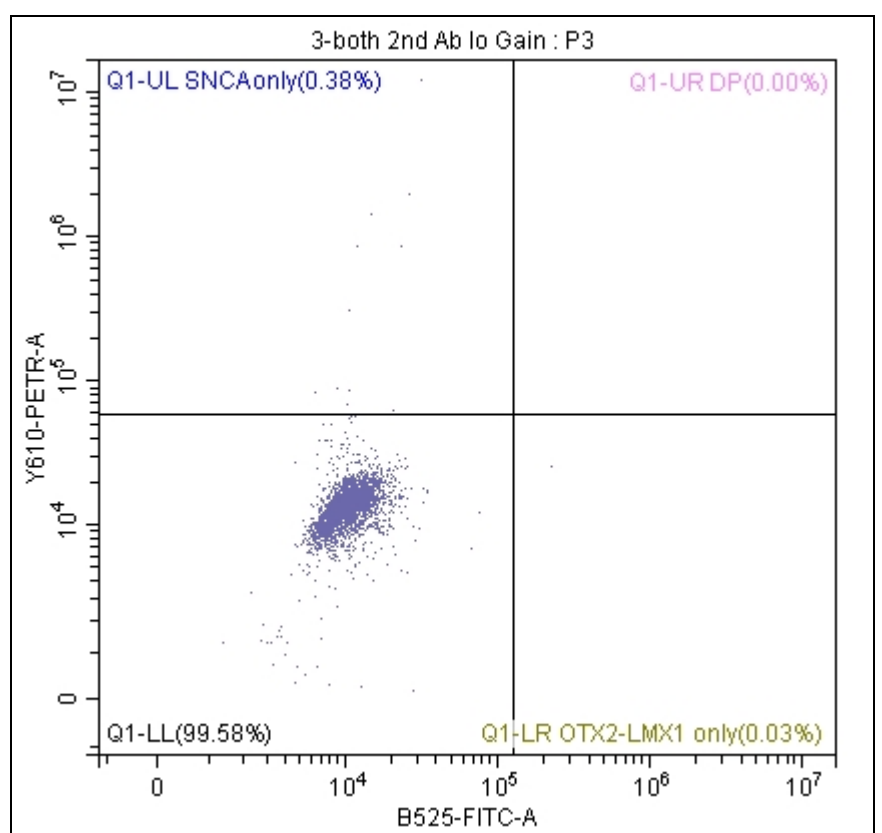

Tube Name: 3-both 2nd Ab lo Gain

Sample ID:

| Population             | Events | % Total | % Parent |
|------------------------|--------|---------|----------|
| ● All Events           | 10000  | 100.00% | 100.00%  |
| ● P1                   | 3180   | 31.80%  | 31.80%   |
| ● P2                   | 2892   | 28.92%  | 90.94%   |
| ● P3                   | 2889   | 28.89%  | 99.90%   |
| ● Q1-UR DP             | 0      | 0.00%   | 0.00%    |
| ● Q1-UL SNCA only      | 11     | 0.11%   | 0.38%    |
| ⊗ Q1-LL                | 2877   | 28.77%  | 99.58%   |
| ● Q1-LR OTX2-LMX1 only | 1      | 0.01%   | 0.03%    |

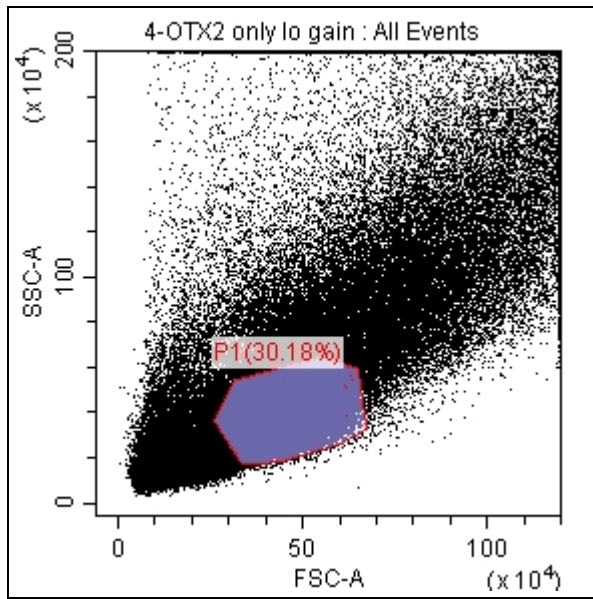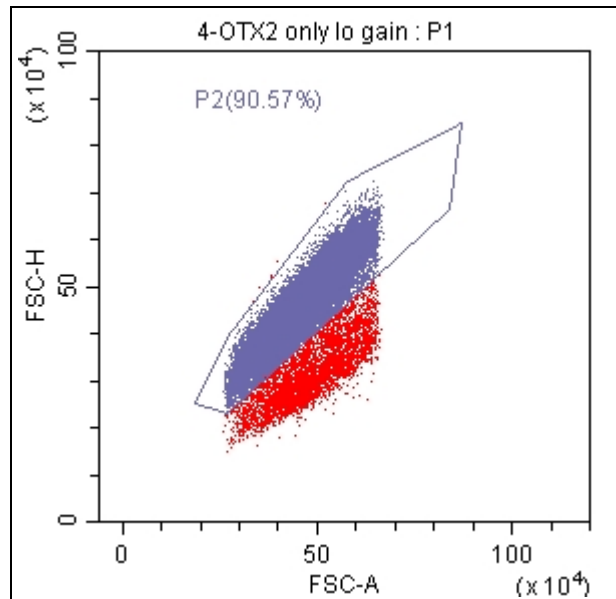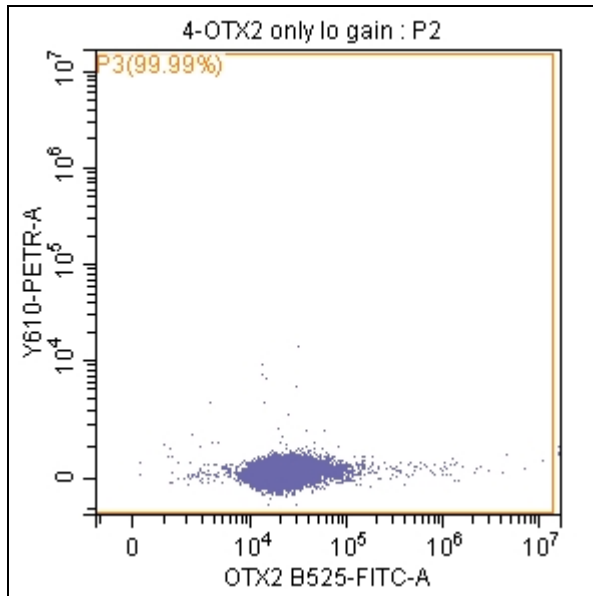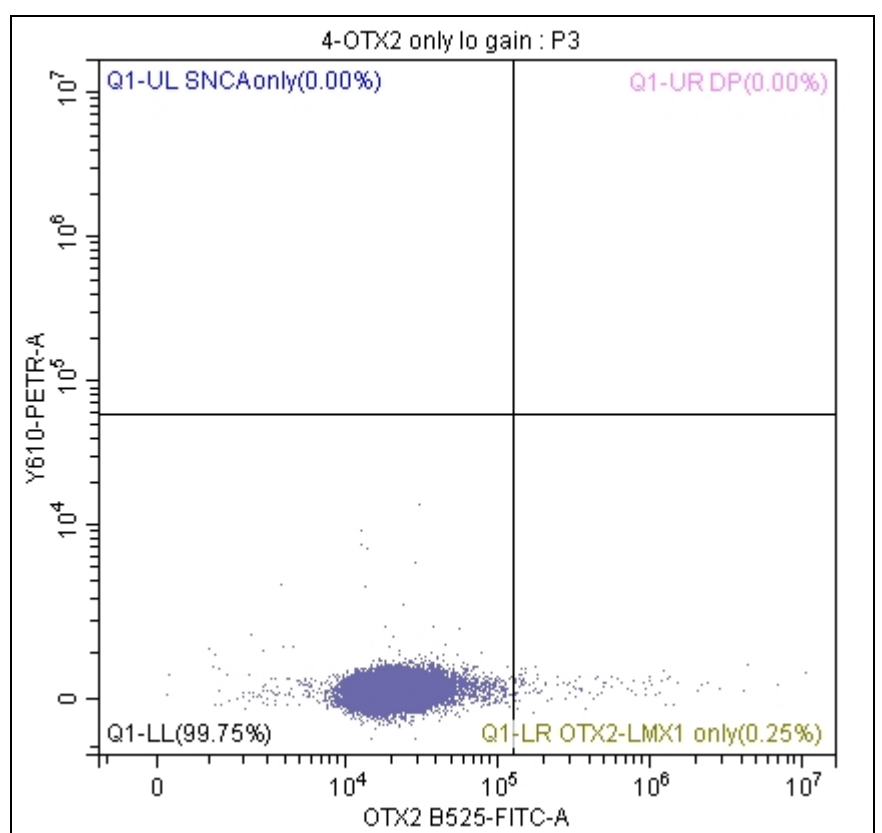

Tube Name: 4-OTX2 only lo gain

Sample ID:

| Population             | Events | % Total | % Parent |
|------------------------|--------|---------|----------|
| ● All Events           | 150000 | 100.00% | 100.00%  |
| ● P1                   | 45267  | 30.18%  | 30.18%   |
| ● P2                   | 40999  | 27.33%  | 90.57%   |
| ● P3                   | 40995  | 27.33%  | 99.99%   |
| ● Q1-UR DP             | 0      | 0.00%   | 0.00%    |
| ● Q1-UL SNCA only      | 0      | 0.00%   | 0.00%    |
| ⊗ Q1-LL                | 40893  | 27.26%  | 99.75%   |
| ● Q1-LR OTX2-LMX1 only | 102    | 0.07%   | 0.25%    |

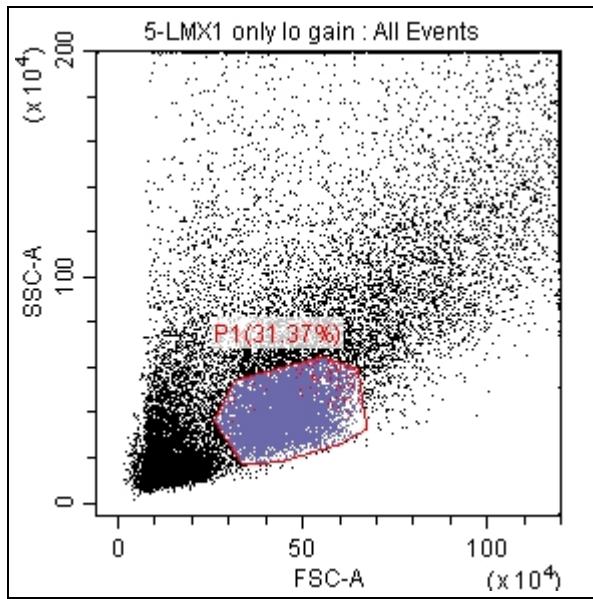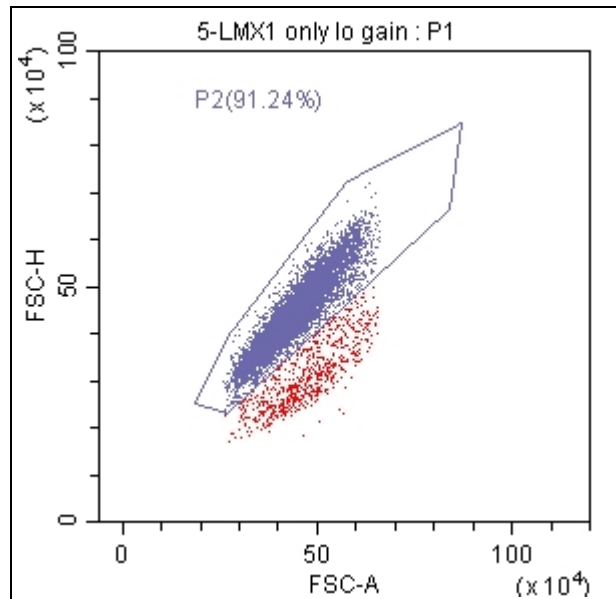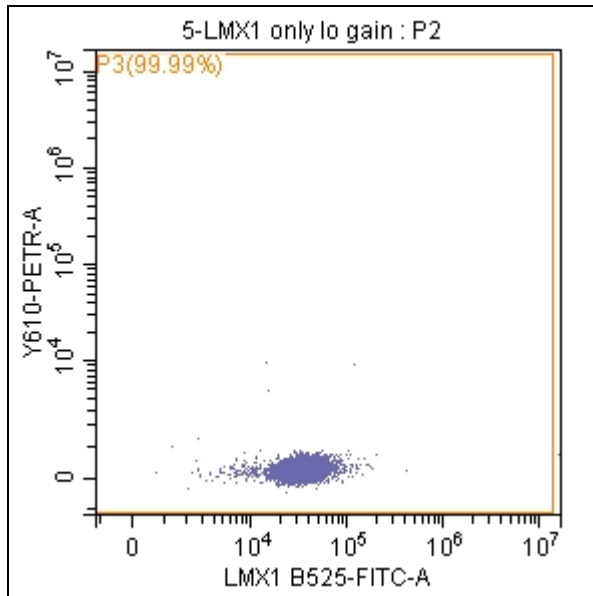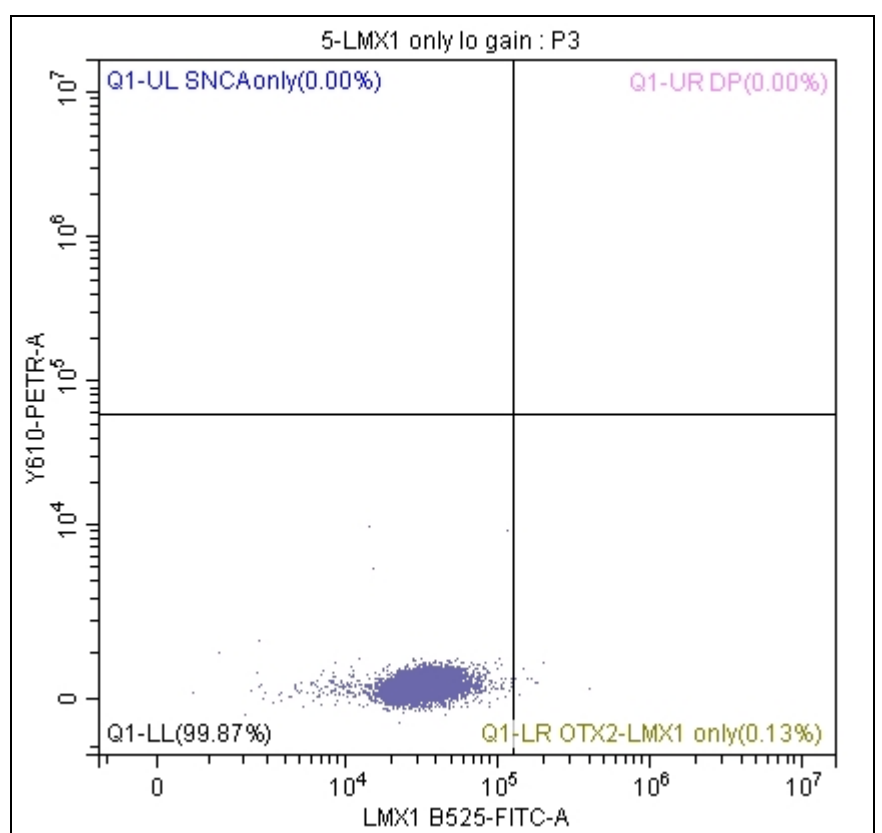

Tube Name: 5-LMX1 only lo gain

Sample ID:

| Population             | Events | % Total | % Parent |
|------------------------|--------|---------|----------|
| ● All Events           | 24918  | 100.00% | 100.00%  |
| ● P1                   | 7816   | 31.37%  | 31.37%   |
| ● P2                   | 7131   | 28.62%  | 91.24%   |
| ● P3                   | 7130   | 28.61%  | 99.99%   |
| ● Q1-UR DP             | 0      | 0.00%   | 0.00%    |
| ● Q1-UL SNCA only      | 0      | 0.00%   | 0.00%    |
| ⊗ Q1-LL                | 7121   | 28.58%  | 99.87%   |
| ● Q1-LR OTX2-LMX1 only | 9      | 0.04%   | 0.13%    |



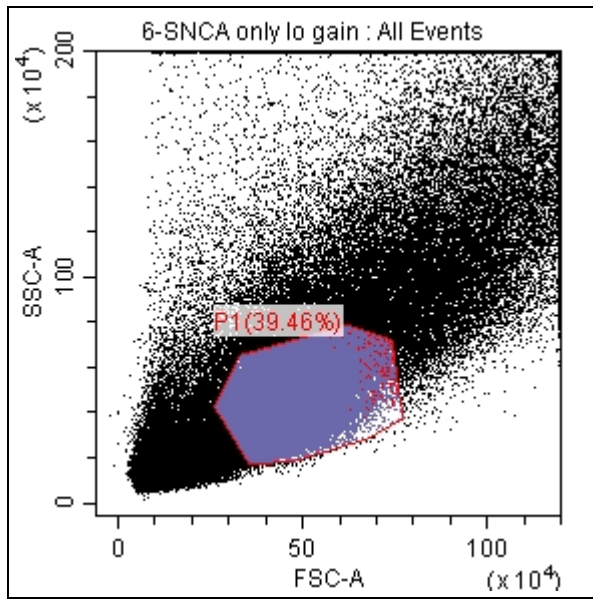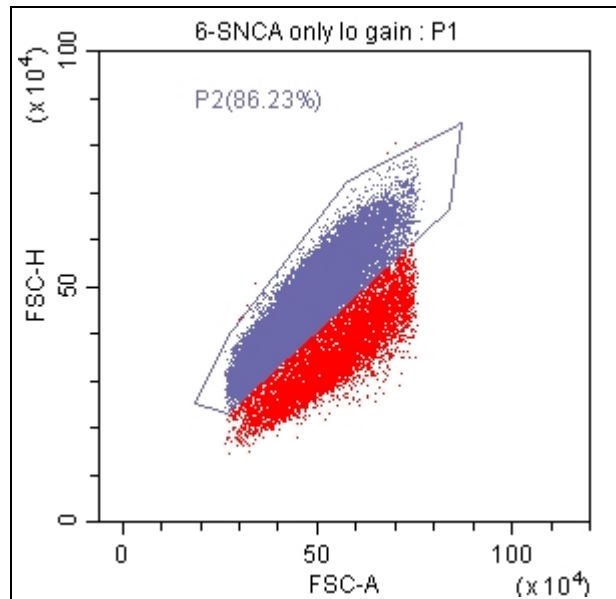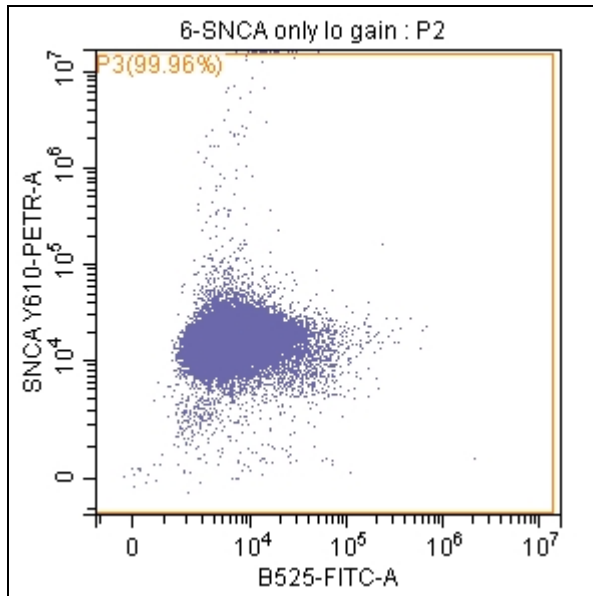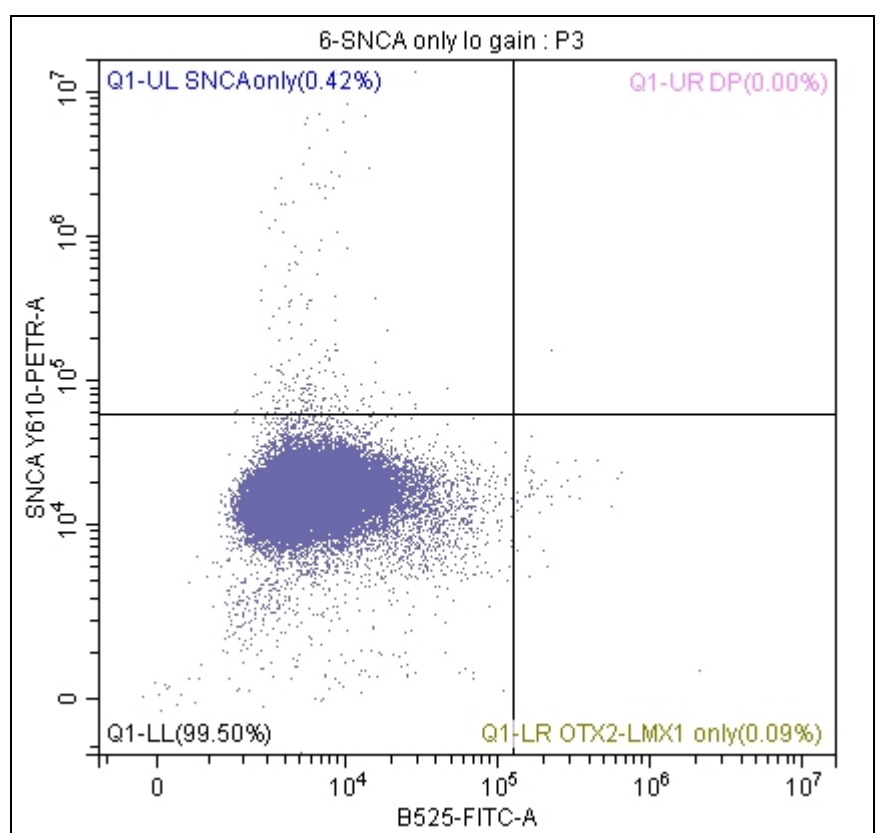

Tube Name: 6-SNCA only lo gain

Sample ID:

| Population             | Events | % Total | % Parent |
|------------------------|--------|---------|----------|
| ● All Events           | 150000 | 100.00% | 100.00%  |
| ● P1                   | 59192  | 39.46%  | 39.46%   |
| ● P2                   | 51044  | 34.03%  | 86.23%   |
| ● P3                   | 51024  | 34.02%  | 99.96%   |
| ● Q1-UR DP             | 1      | 0.00%   | 0.00%    |
| ● Q1-UL SNCA only      | 212    | 0.14%   | 0.42%    |
| ⊗ Q1-LL                | 50767  | 33.84%  | 99.50%   |
| ● Q1-LR OTX2-LMX1 only | 44     | 0.03%   | 0.09%    |

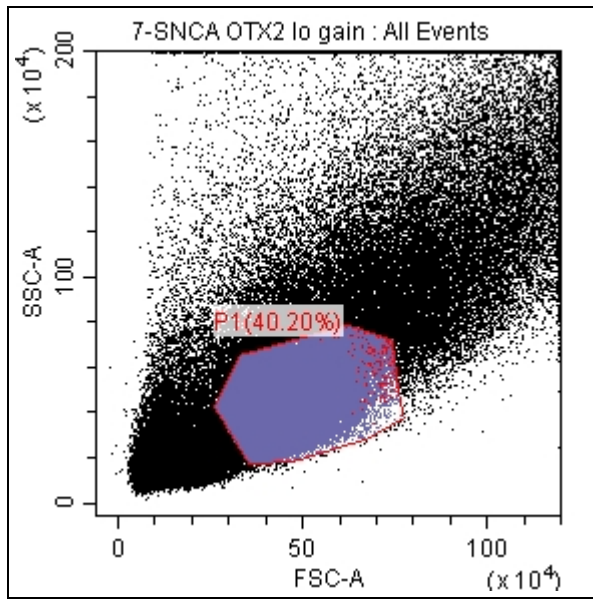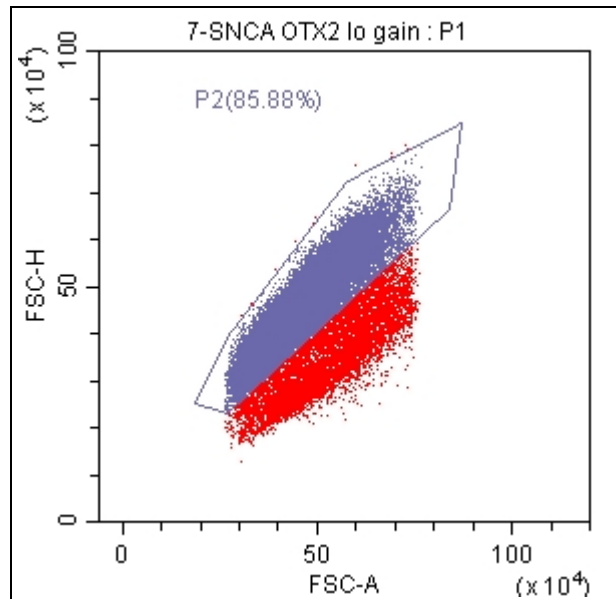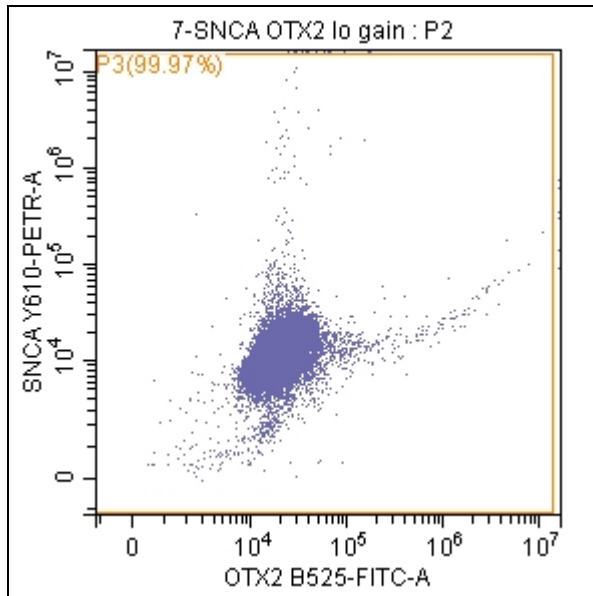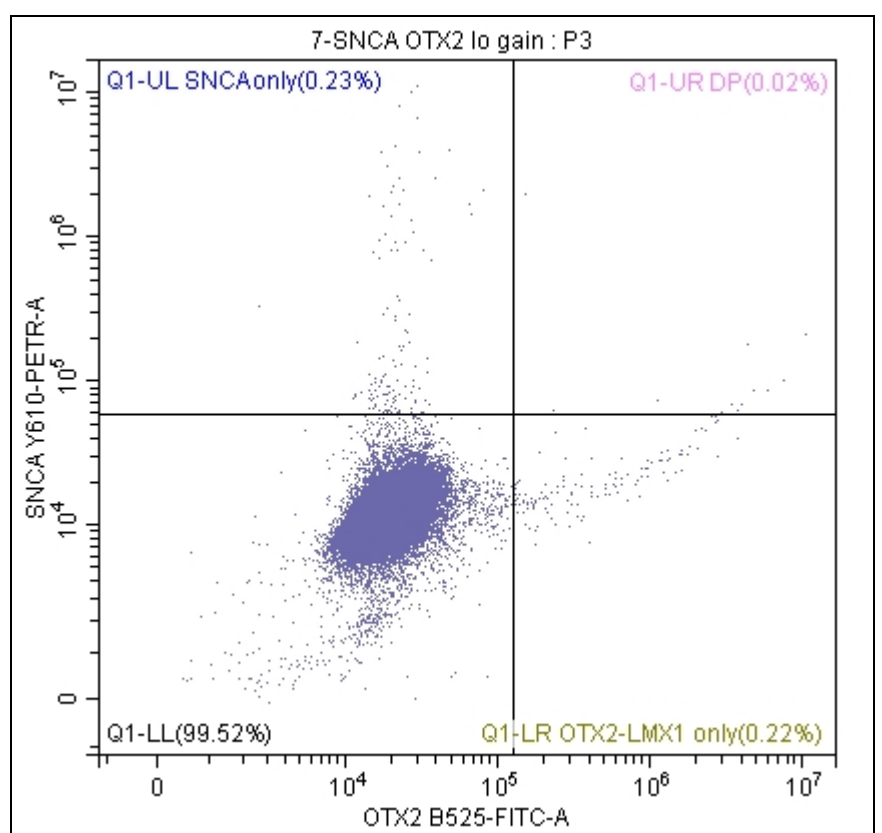

Tube Name: 7-SNCA OTX2 lo gain

Sample ID:

| Population             | Events | % Total | % Parent |
|------------------------|--------|---------|----------|
| ● All Events           | 158072 | 100.00% | 100.00%  |
| ● P1                   | 63546  | 40.20%  | 40.20%   |
| ● P2                   | 54571  | 34.52%  | 85.88%   |
| ● P3                   | 54552  | 34.51%  | 99.97%   |
| ● Q1-UR DP             | 12     | 0.01%   | 0.02%    |
| ● Q1-UL SNCA only      | 128    | 0.08%   | 0.23%    |
| ⊗ Q1-LL                | 54290  | 34.35%  | 99.52%   |
| ● Q1-LR OTX2-LMX1 only | 122    | 0.08%   | 0.22%    |

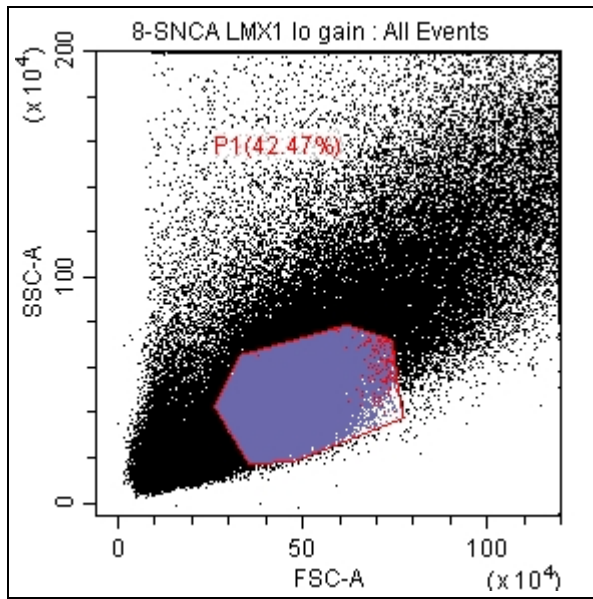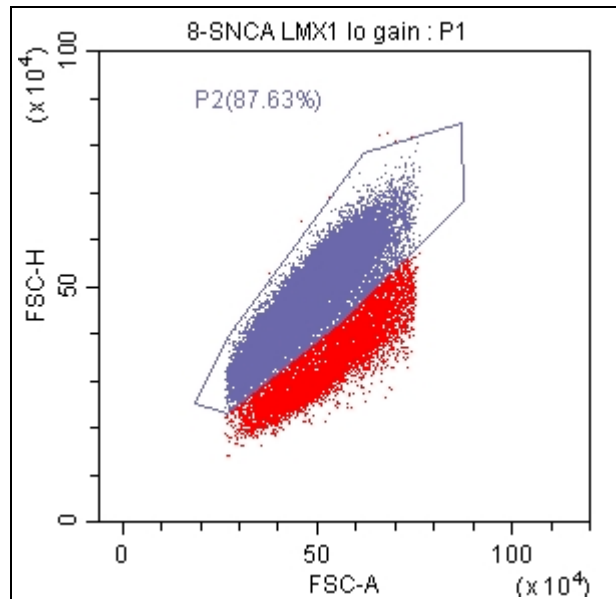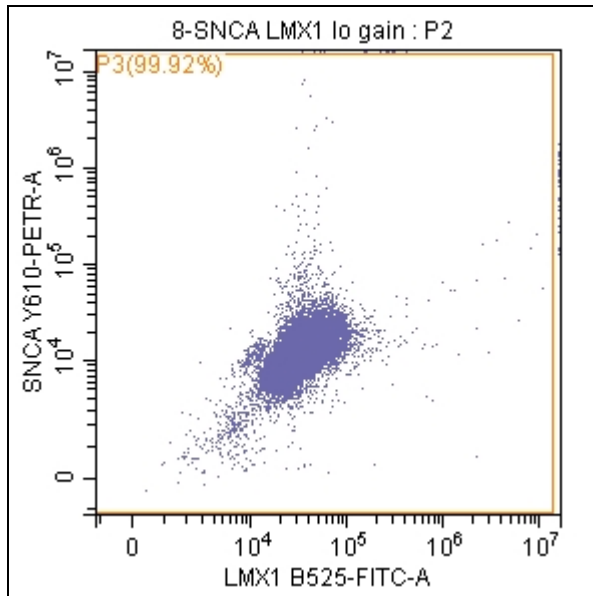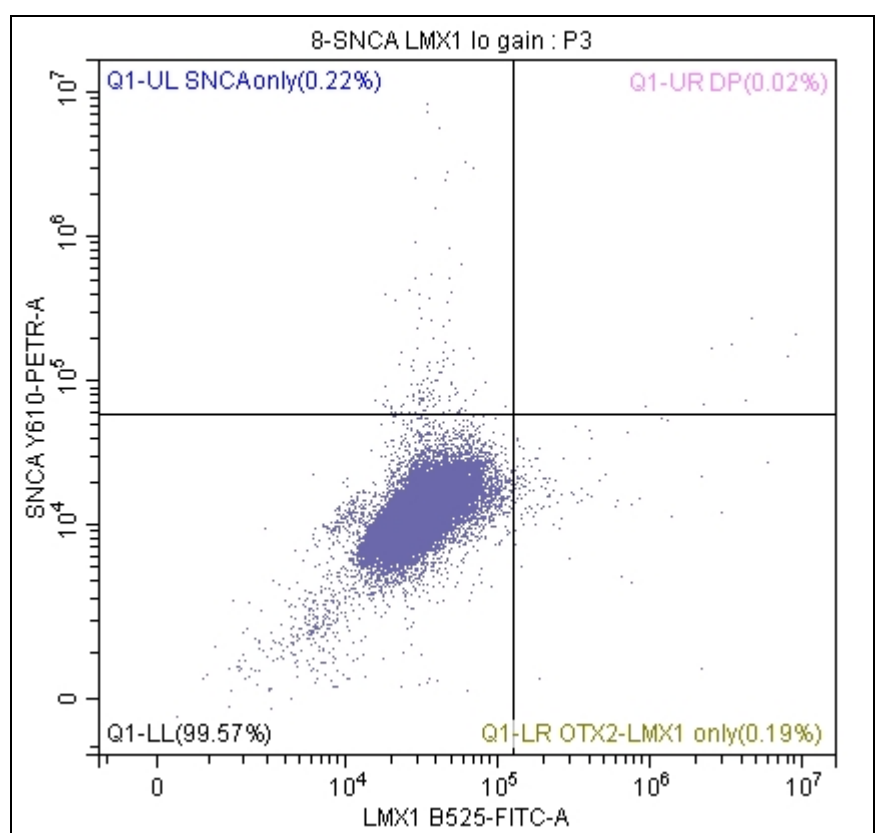

Tube Name: 8-SNCA LMX1 lo gain

Sample ID:

| Population             | Events | % Total | % Parent |
|------------------------|--------|---------|----------|
| ● All Events           | 150000 | 100.00% | 100.00%  |
| ● P1                   | 63704  | 42.47%  | 42.47%   |
| ● P2                   | 55823  | 37.22%  | 87.63%   |
| ● P3                   | 55781  | 37.19%  | 99.92%   |
| ● Q1-UR DP             | 9      | 0.01%   | 0.02%    |
| ● Q1-UL SNCA only      | 125    | 0.08%   | 0.22%    |
| ⊗ Q1-LL                | 55539  | 37.03%  | 99.57%   |
| ● Q1-LR OTX2-LMX1 only | 108    | 0.07%   | 0.19%    |
