# Supplementary material for: Identification of an early subset of cerebellar nuclei neurons in mice
Source: eLife journal article supplement (doi:10.7554/elife.93778), 2024-04-08
Supplement: fig3-data2 [file elife-93778-fig3-data2-v1.zip]

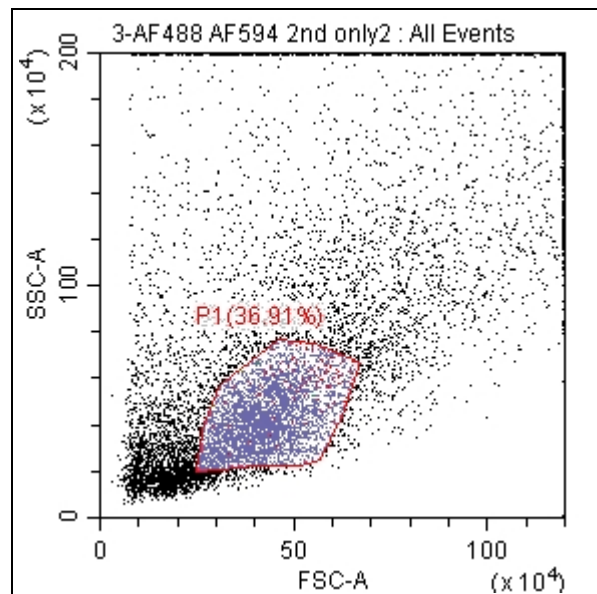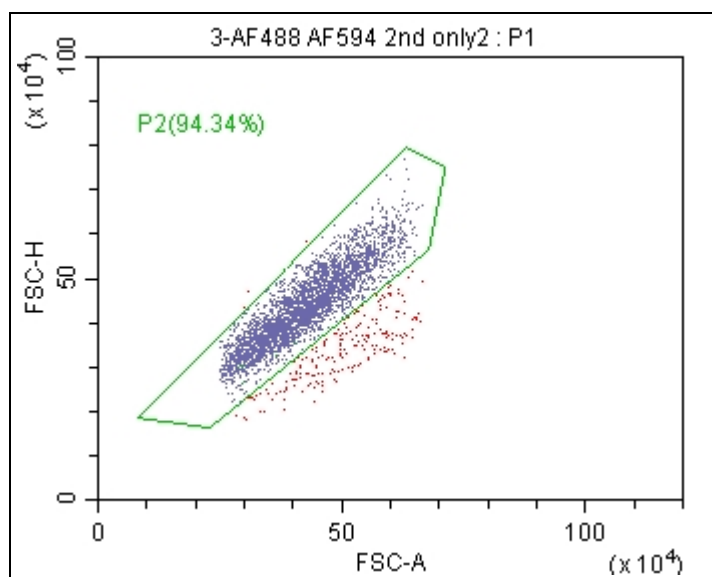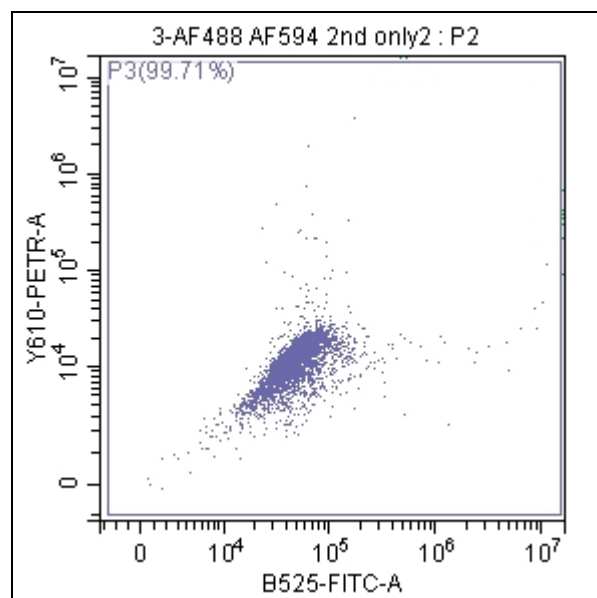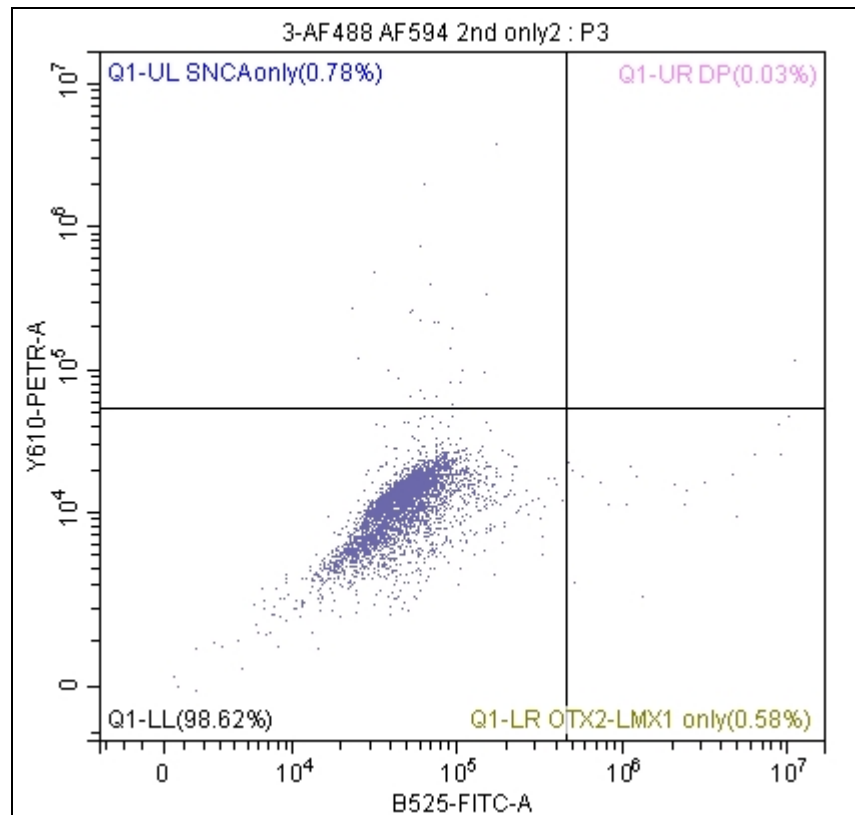

Tube Name: 3-AF488 AF594 2nd only2

Sample ID:

| Population           | Events | % Total | % Parent |
|----------------------|--------|---------|----------|
| ▼ All Events         | 10000  | 100.00% | 100.00%  |
| ▼ P1                 | 3691   | 36.91%  | 36.91%   |
| ▼ P2                 | 3482   | 34.82%  | 94.34%   |
| ▼ P3                 | 3472   | 34.72%  | 99.71%   |
| Q1-UR DP             | 1      | 0.01%   | 0.03%    |
| Q1-UL SNCA only      | 27     | 0.27%   | 0.78%    |
| Q1-LL                | 3424   | 34.24%  | 98.62%   |
| Q1-LR OTX2-LMX1 only | 20     | 0.20%   | 0.58%    |

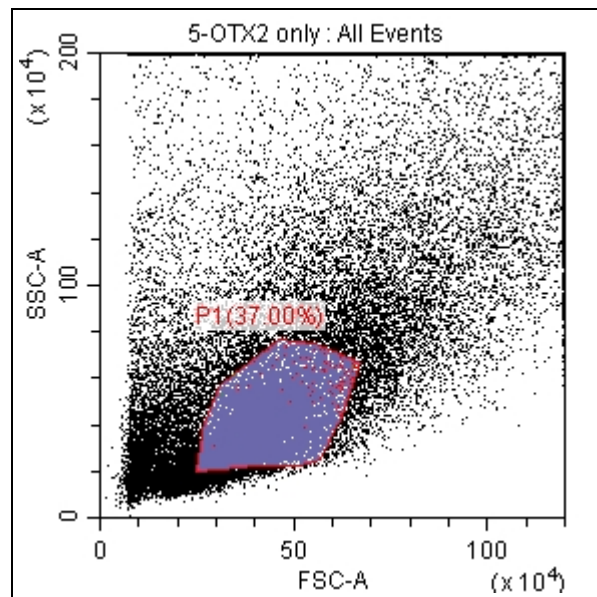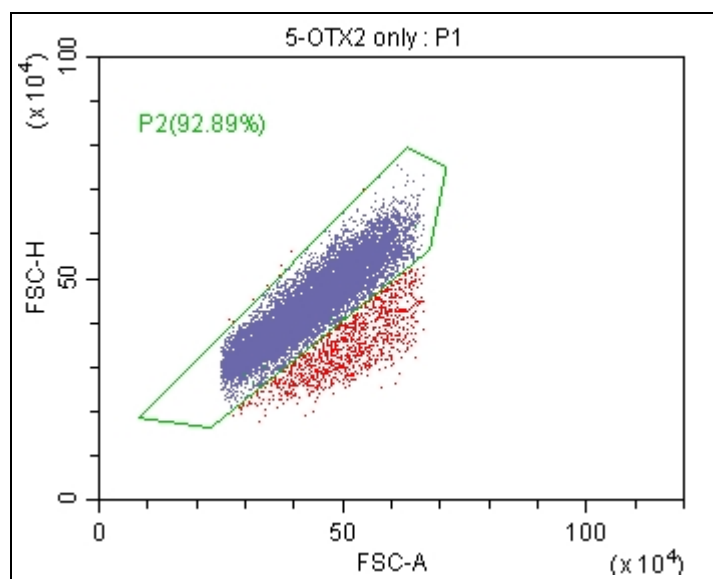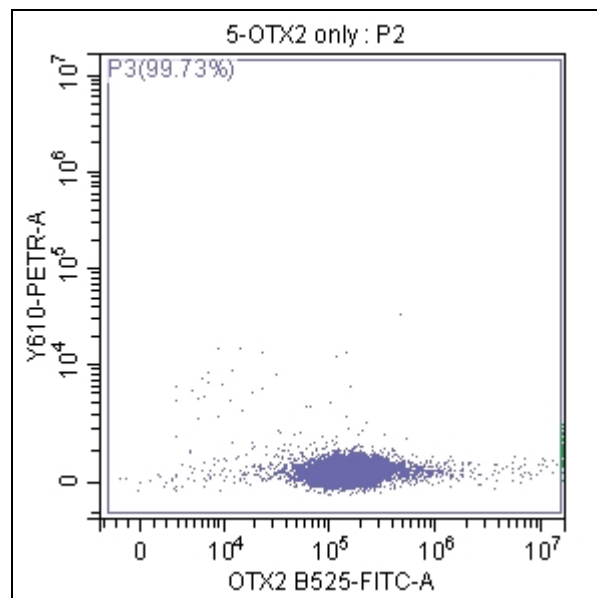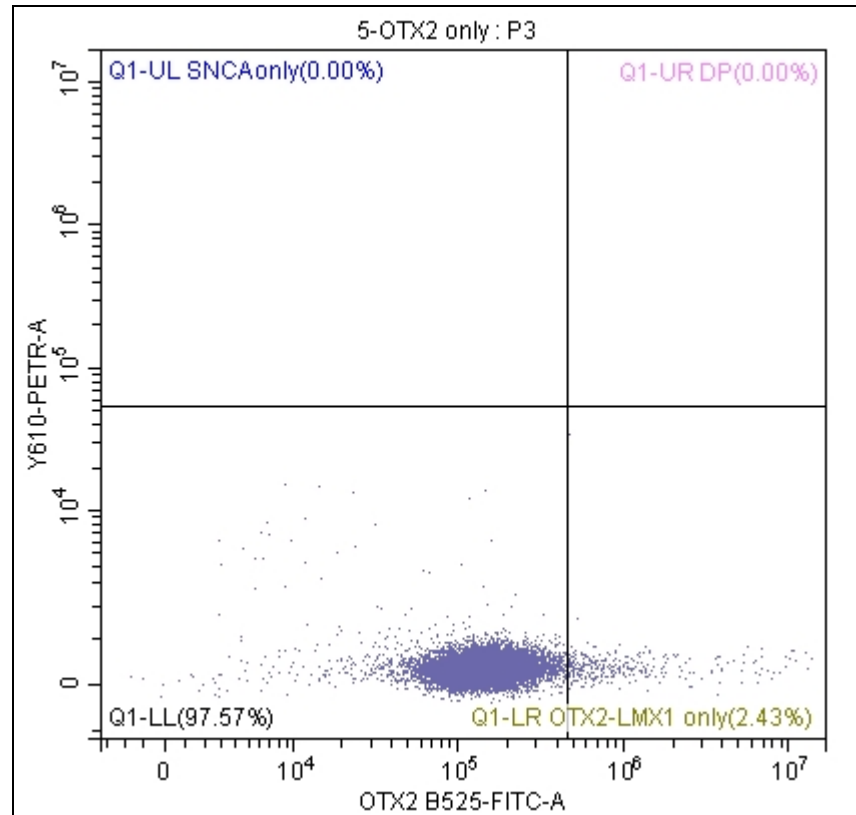

Tube Name: 5-OTX2 only

Sample ID:

| Population             | Events | % Total | % Parent |
|------------------------|--------|---------|----------|
| ▼ ● All Events         | 40000  | 100.00% | 100.00%  |
| ▼ ● P1                 | 14800  | 37.00%  | 37.00%   |
| ▼ ● P2                 | 13748  | 34.37%  | 92.89%   |
| ▼ ● P3                 | 13711  | 34.28%  | 99.73%   |
| ● Q1-UR DP             | 0      | 0.00%   | 0.00%    |
| ● Q1-UL SNCA only      | 0      | 0.00%   | 0.00%    |
| ⊗ Q1-LL                | 13378  | 33.45%  | 97.57%   |
| ● Q1-LR OTX2-LMX1 only | 333    | 0.83%   | 2.43%    |

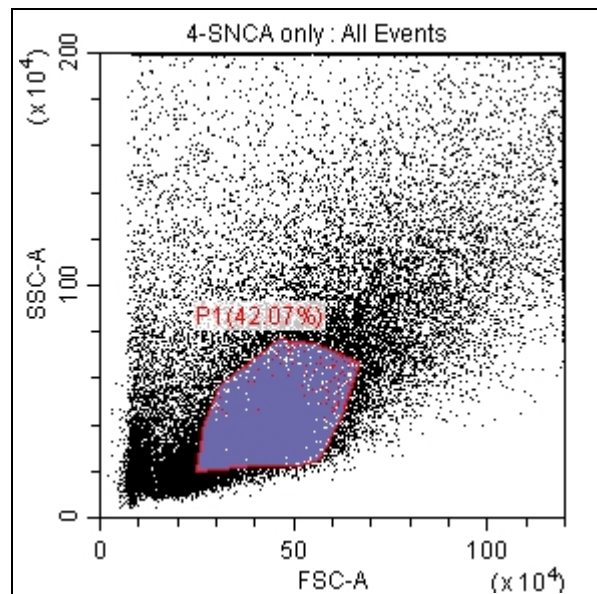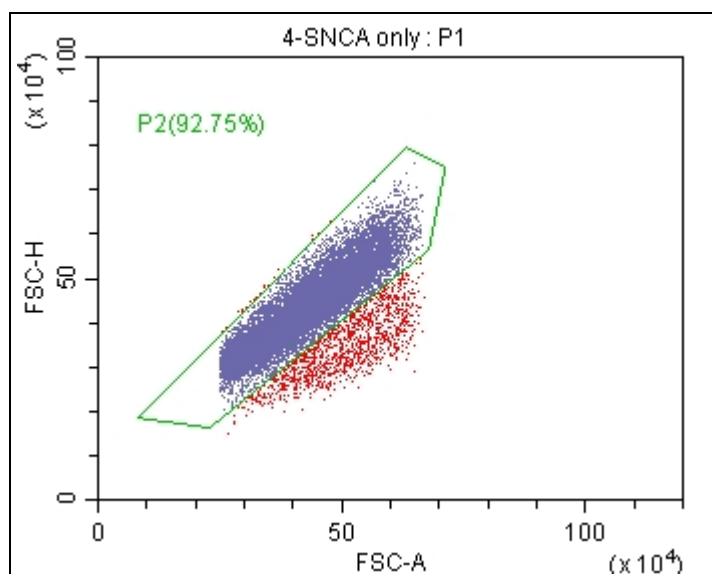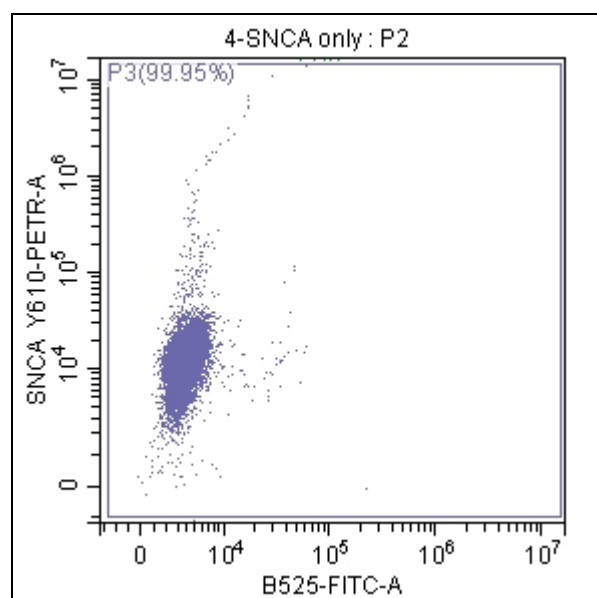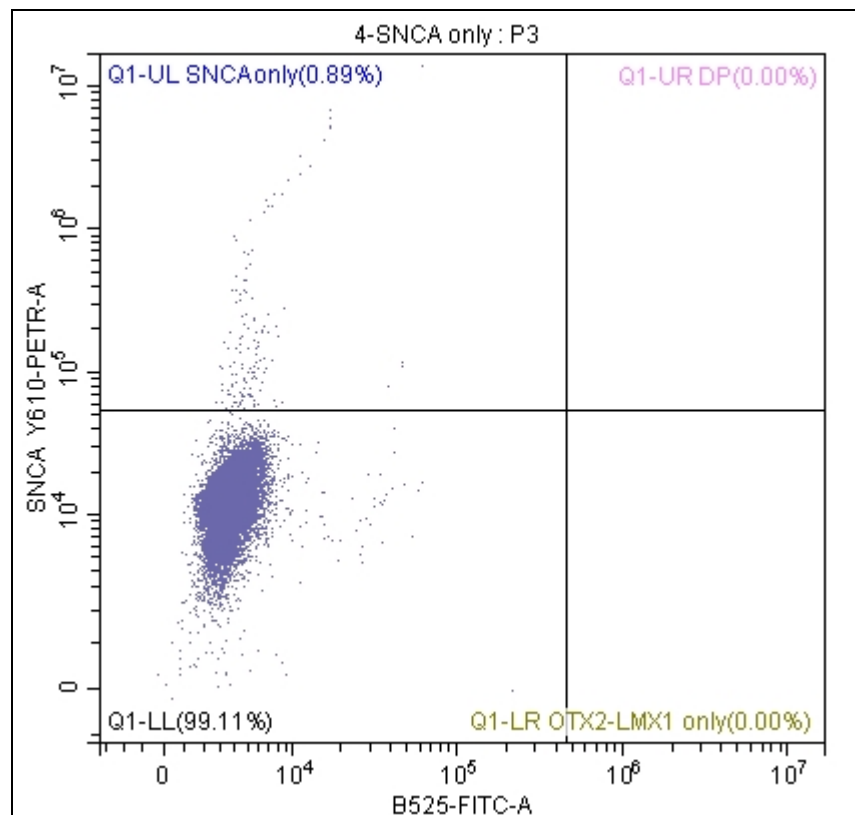

Tube Name: 4-SNCA only

Sample ID:

| Population           | Events | % Total | % Parent |
|----------------------|--------|---------|----------|
| ▼ All Events         | 40000  | 100.00% | 100.00%  |
| ▼ P1                 | 16827  | 42.07%  | 42.07%   |
| ▼ P2                 | 15607  | 39.02%  | 92.75%   |
| ▼ P3                 | 15599  | 39.00%  | 99.95%   |
| Q1-UR DP             | 0      | 0.00%   | 0.00%    |
| Q1-UL SNCA only      | 139    | 0.35%   | 0.89%    |
| Q1-LL                | 15460  | 38.65%  | 99.11%   |
| Q1-LR OTX2-LMX1 only | 0      | 0.00%   | 0.00%    |

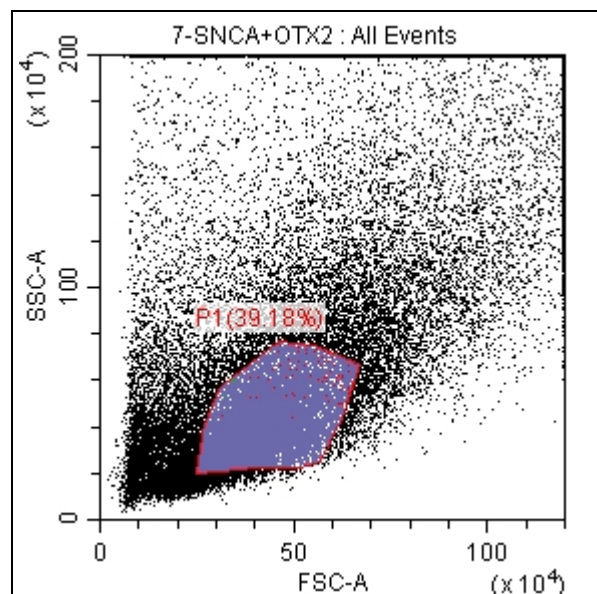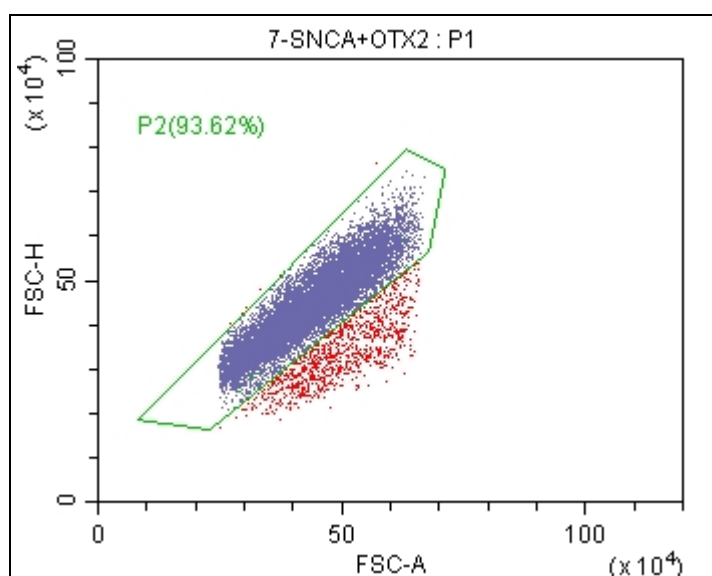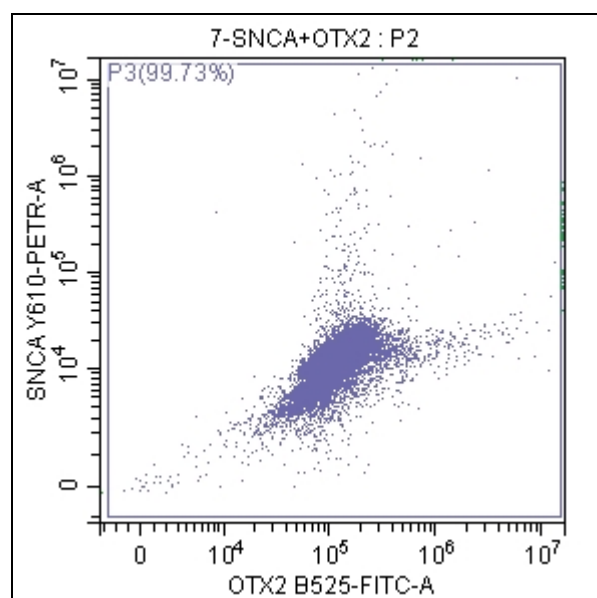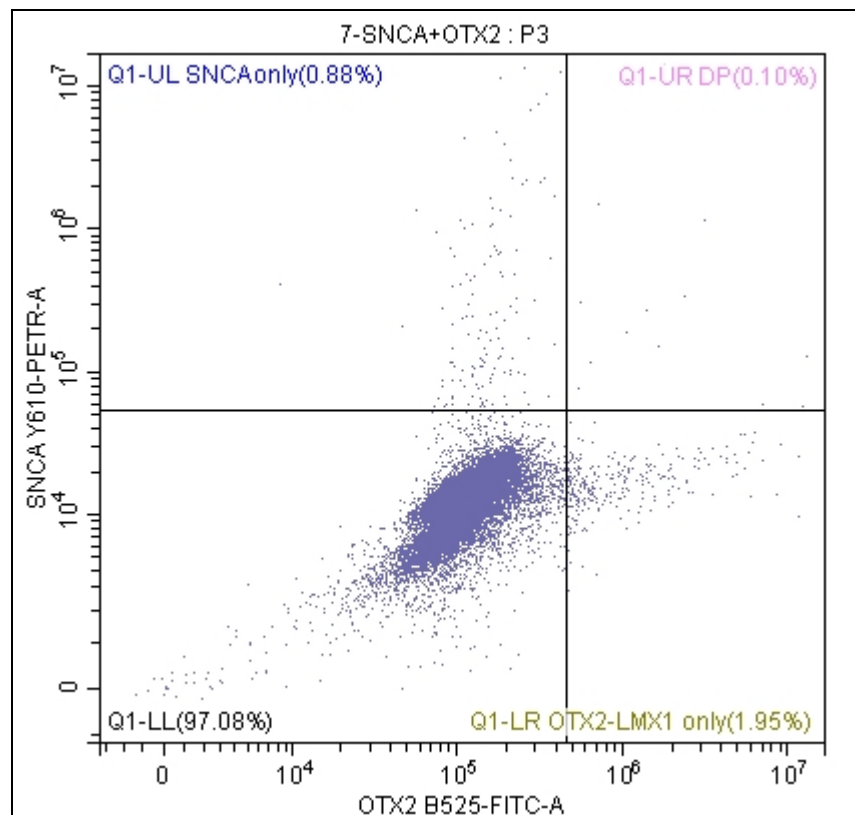

Tube Name: 7-SNCA+OTX2

Sample ID:

| Population           | Events | % Total | % Parent |
|----------------------|--------|---------|----------|
| ▼ All Events         | 40000  | 100.00% | 100.00%  |
| ▼ P1                 | 15673  | 39.18%  | 39.18%   |
| ▼ P2                 | 14673  | 36.68%  | 93.62%   |
| ▼ P3                 | 14633  | 36.58%  | 99.73%   |
| Q1-UR DP             | 14     | 0.04%   | 0.10%    |
| Q1-UL SNCA only      | 129    | 0.32%   | 0.88%    |
| Q1-LL                | 14205  | 35.51%  | 97.08%   |
| Q1-LR OTX2-LMX1 only | 285    | 0.71%   | 1.95%    |

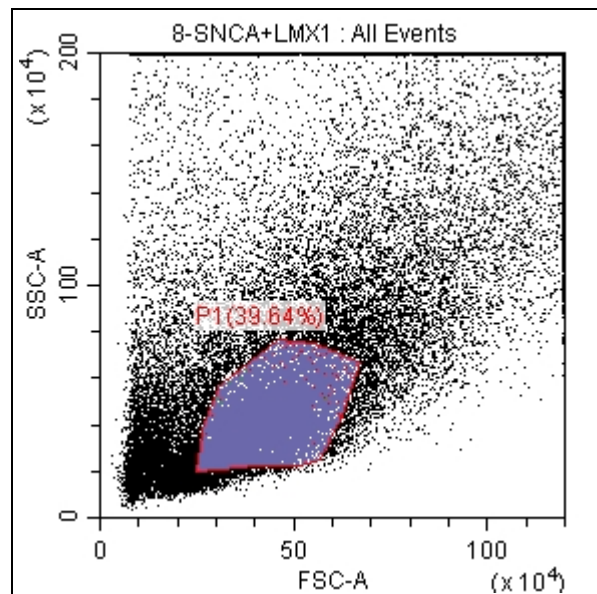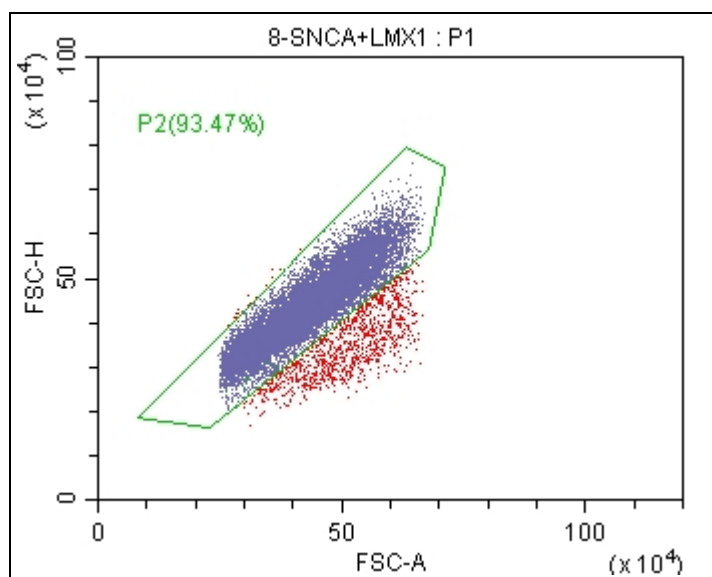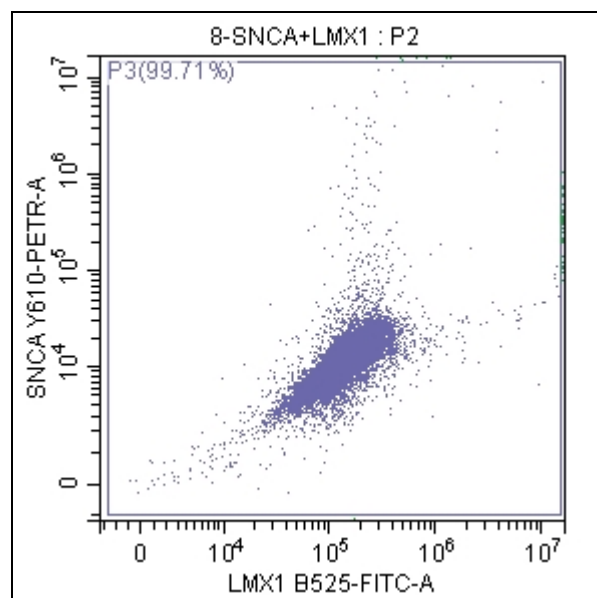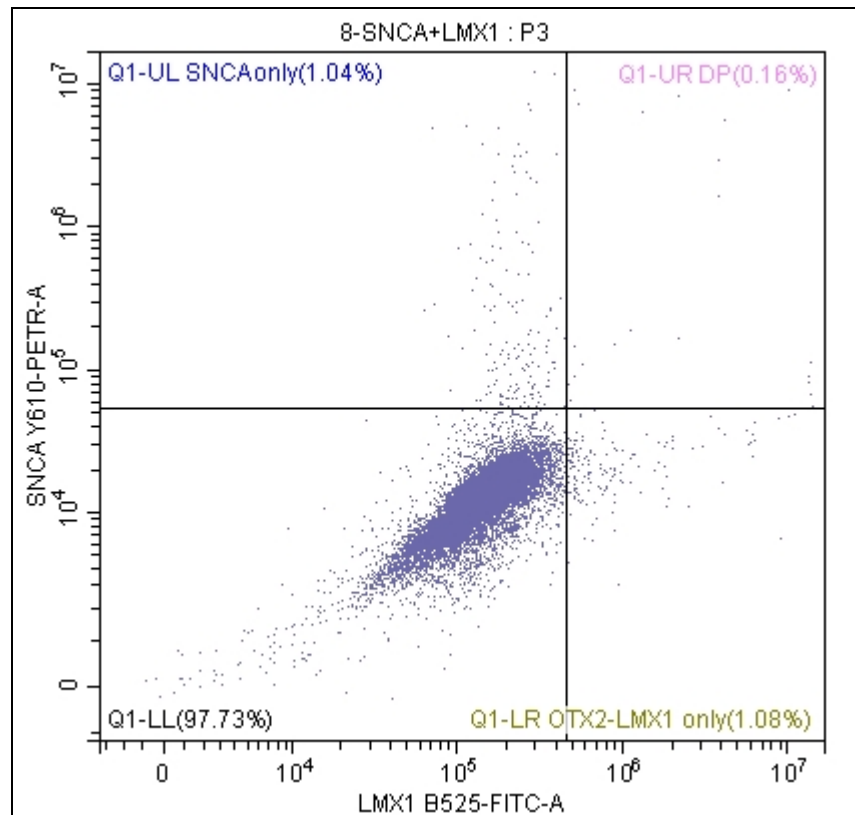

Tube Name: 8-SNCA+LMX1

Sample ID:

| Population             | Events | % Total | % Parent |
|------------------------|--------|---------|----------|
| ▼ ● All Events         | 40000  | 100.00% | 100.00%  |
| ▼ ● P1                 | 15856  | 39.64%  | 39.64%   |
| ▼ ● P2                 | 14820  | 37.05%  | 93.47%   |
| ▼ ● P3                 | 14777  | 36.94%  | 99.71%   |
| ● Q1-UR DP             | 23     | 0.06%   | 0.16%    |
| ● Q1-UL SNCA only      | 153    | 0.38%   | 1.04%    |
| ⊗ Q1-LL                | 14441  | 36.10%  | 97.73%   |
| ● Q1-LR OTX2-LMX1 only | 160    | 0.40%   | 1.08%    |

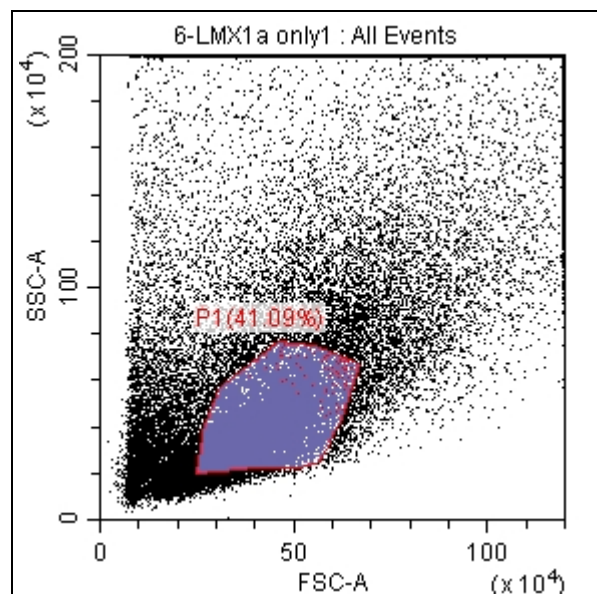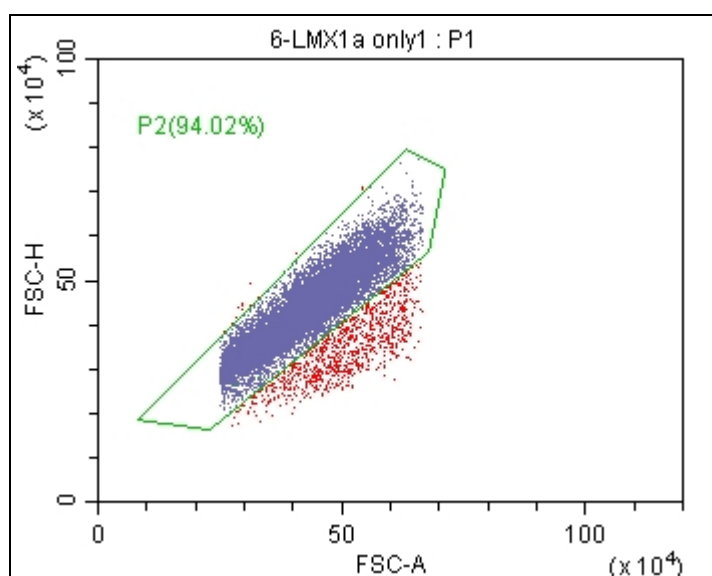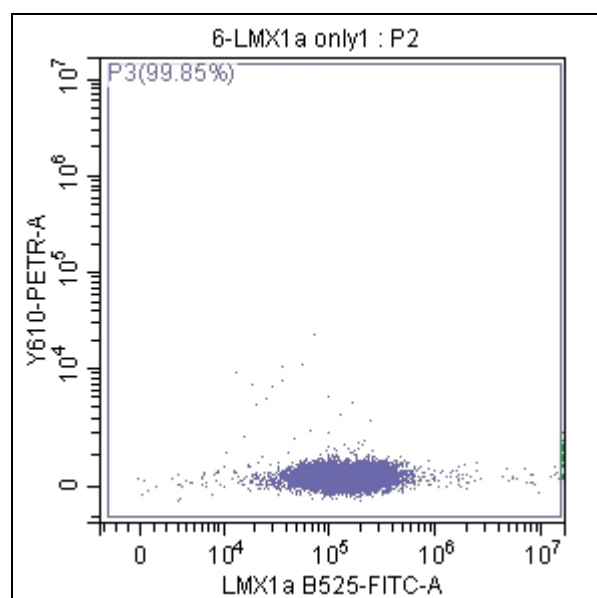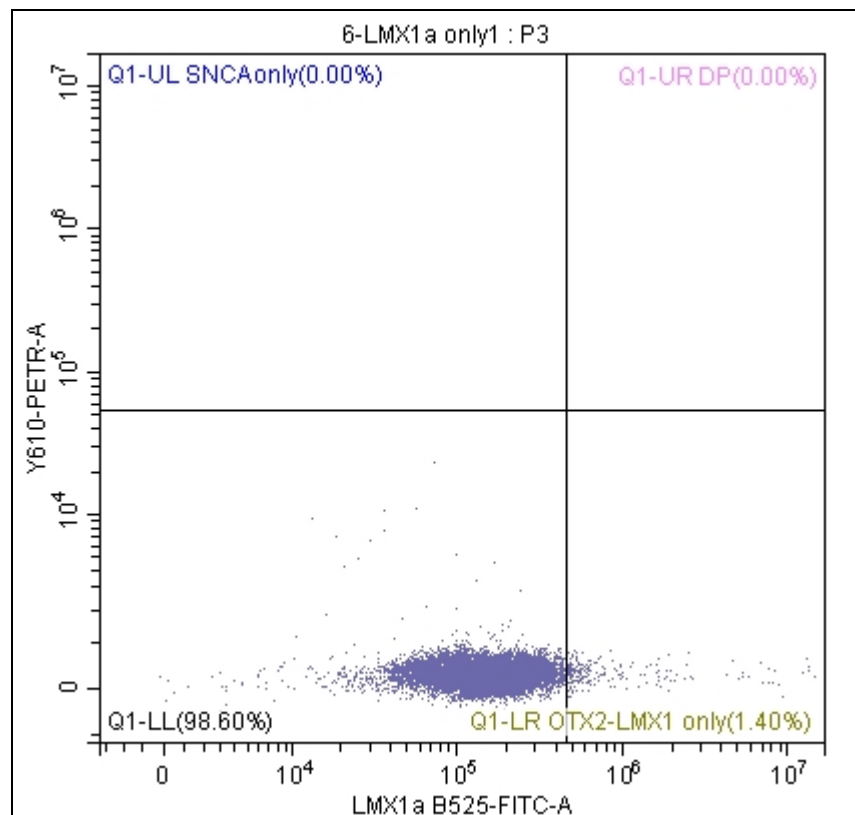

Tube Name: 6-LMX1a only1

Sample ID:

| Population             | Events | % Total | % Parent |
|------------------------|--------|---------|----------|
| ▼ ● All Events         | 40000  | 100.00% | 100.00%  |
| ▼ ● P1                 | 16437  | 41.09%  | 41.09%   |
| ▼ ● P2                 | 15454  | 38.64%  | 94.02%   |
| ▼ ● P3                 | 15431  | 38.58%  | 99.85%   |
| ● Q1-UR DP             | 0      | 0.00%   | 0.00%    |
| ● Q1-UL SNCA only      | 0      | 0.00%   | 0.00%    |
| ⊗ Q1-LL                | 15215  | 38.04%  | 98.60%   |
| ● Q1-LR OTX2-LMX1 only | 216    | 0.54%   | 1.40%    |
