# Supplementary material for: Identification of an early subset of cerebellar nuclei neurons in mice
Source: eLife journal article supplement (doi:10.7554/elife.93778), 2024-04-08
Supplement: fig3-data2 [file elife-93778-fig3-data2-v1.zip]

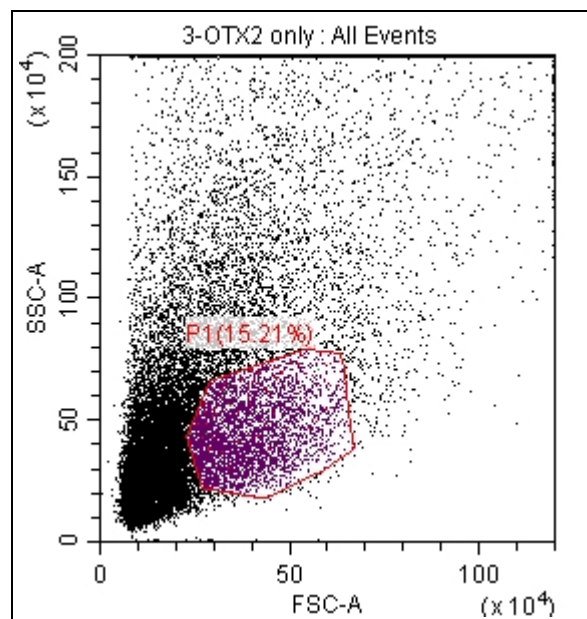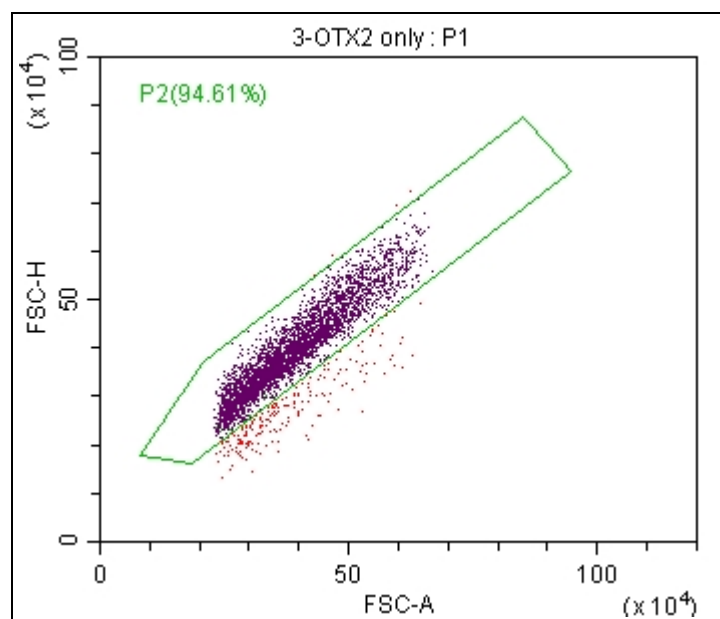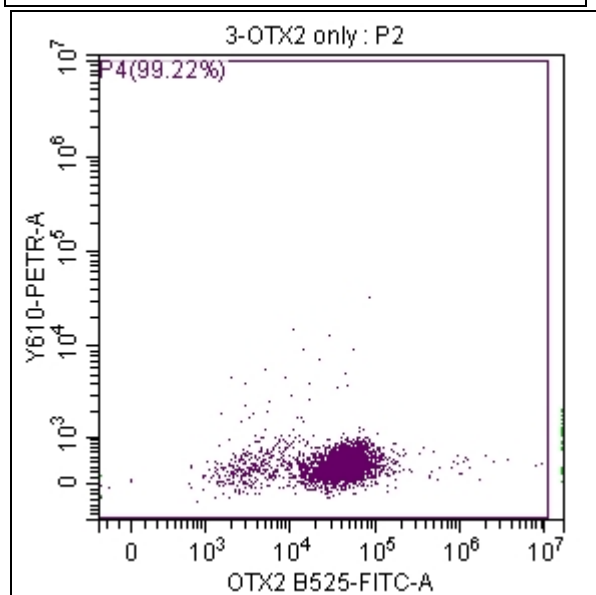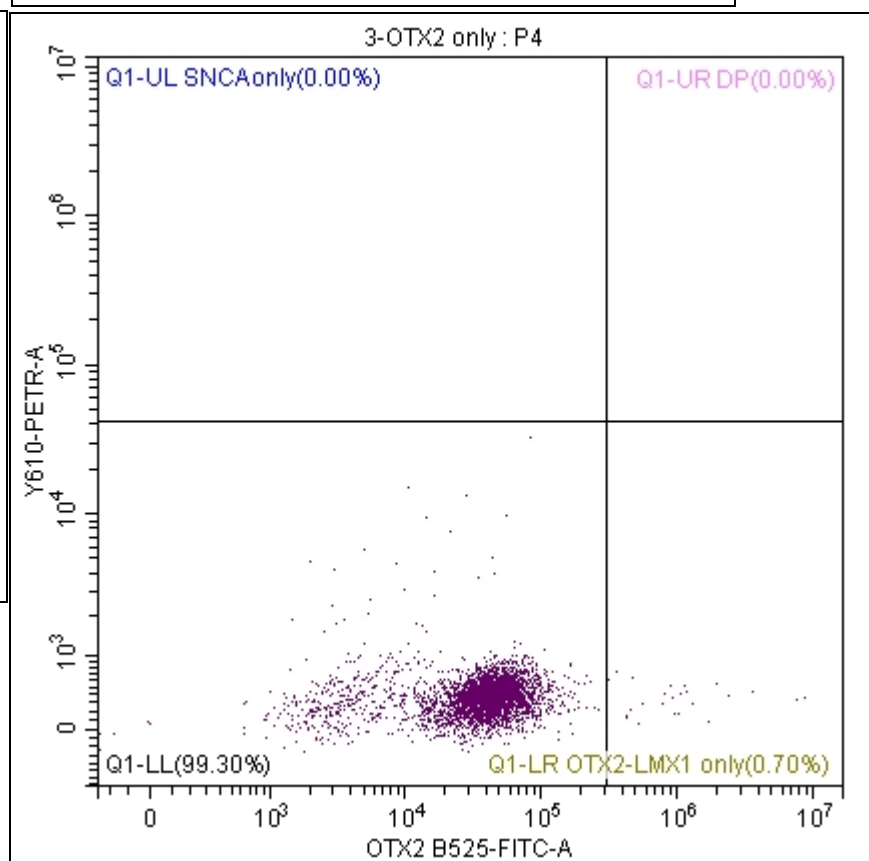

Tube Name: 3-OTX2 only

Sample ID:

| Population             | Events | % Total | % Parent |
|------------------------|--------|---------|----------|
| ▼ ● All Events         | 25000  | 100.00% | 100.00%  |
| ▼ ● P1                 | 3802   | 15.21%  | 15.21%   |
| ▼ ● P2                 | 3597   | 14.39%  | 94.61%   |
| ▼ ● P4                 | 3569   | 14.28%  | 99.22%   |
| ● Q1-UR DP             | 0      | 0.00%   | 0.00%    |
| ● Q1-UL SNCA only      | 0      | 0.00%   | 0.00%    |
| ⊗ Q1-LL                | 3544   | 14.18%  | 99.30%   |
| ● Q1-LR OTX2-LMX1 only | 25     | 0.10%   | 0.70%    |

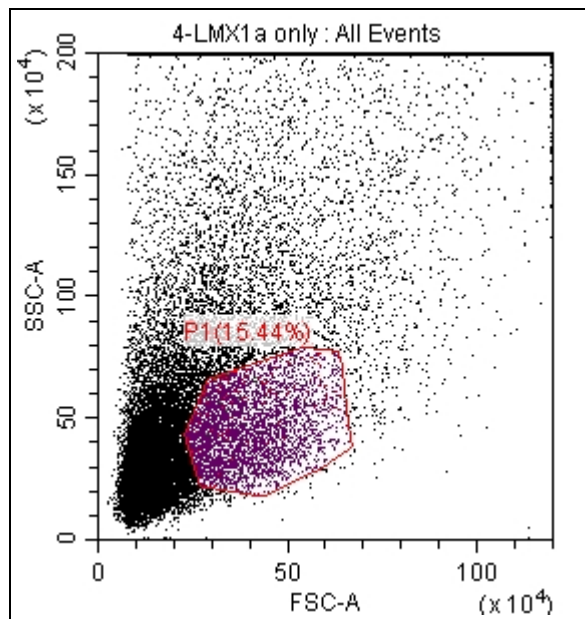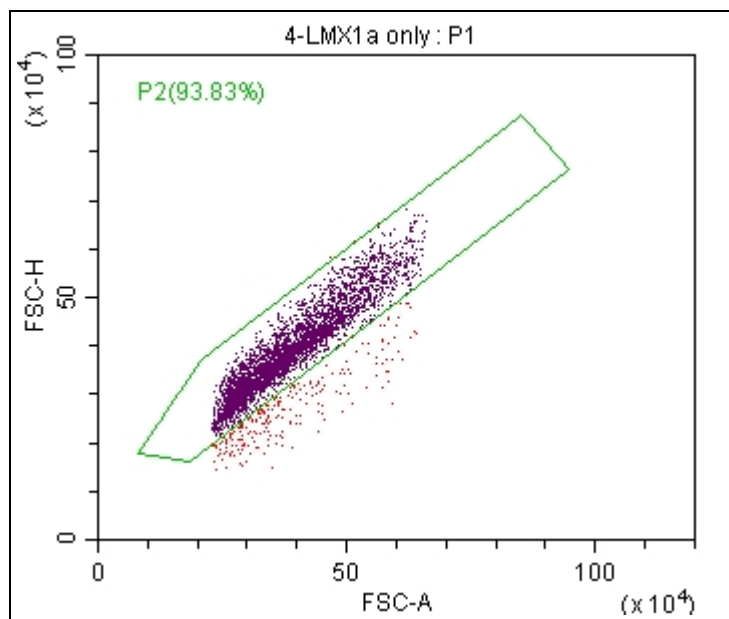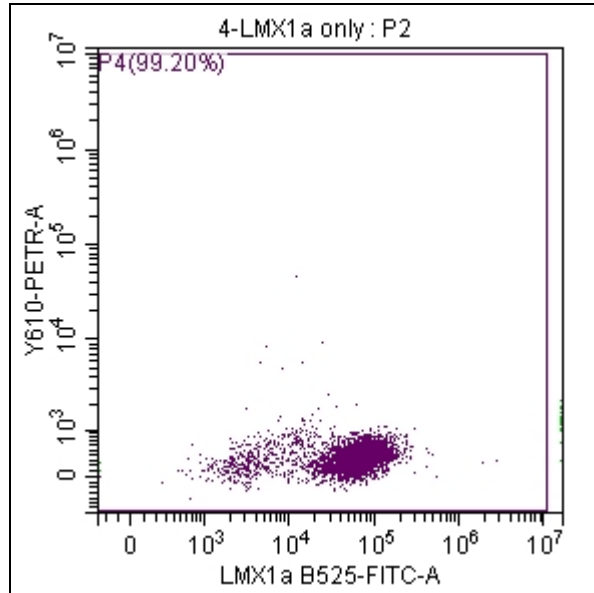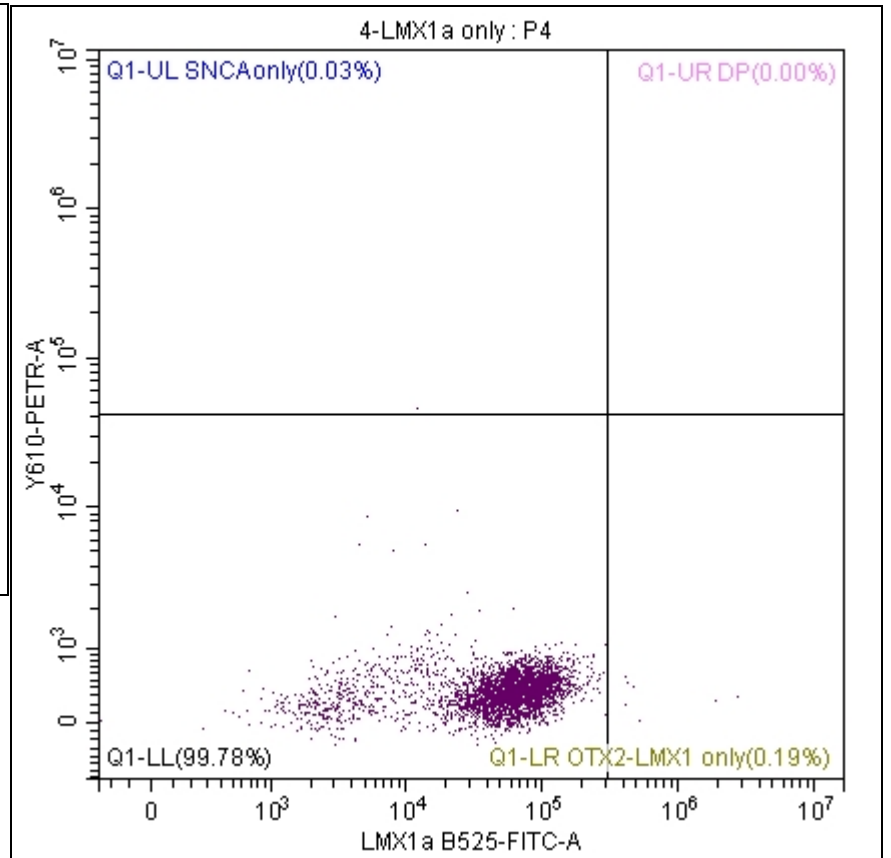

Tube Name: 4-LMX1a only

Sample ID:

| Population             | Events | % Total | % Parent |
|------------------------|--------|---------|----------|
| ▼ ● All Events         | 25000  | 100.00% | 100.00%  |
| ▼ ● P1                 | 3859   | 15.44%  | 15.44%   |
| ▼ ● P2                 | 3621   | 14.48%  | 93.83%   |
| ▼ ● P4                 | 3592   | 14.37%  | 99.20%   |
| ● Q1-UR DP             | 0      | 0.00%   | 0.00%    |
| ● Q1-UL SNCA only      | 1      | 0.00%   | 0.03%    |
| ⊗ Q1-LL                | 3584   | 14.34%  | 99.78%   |
| ● Q1-LR OTX2-LMX1 only | 7      | 0.03%   | 0.19%    |

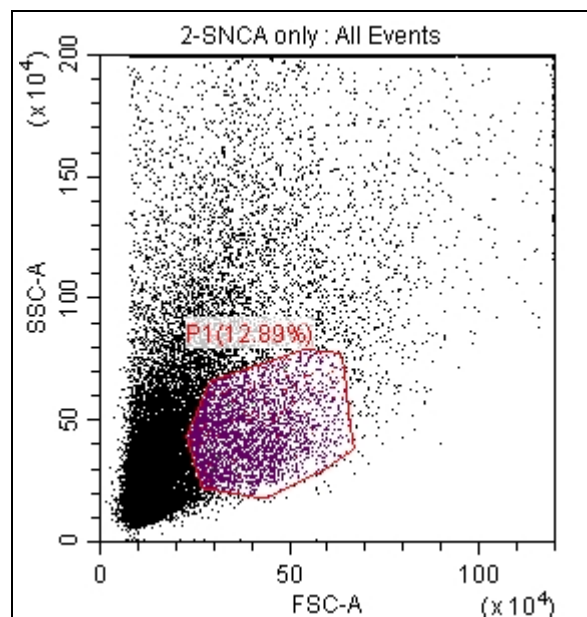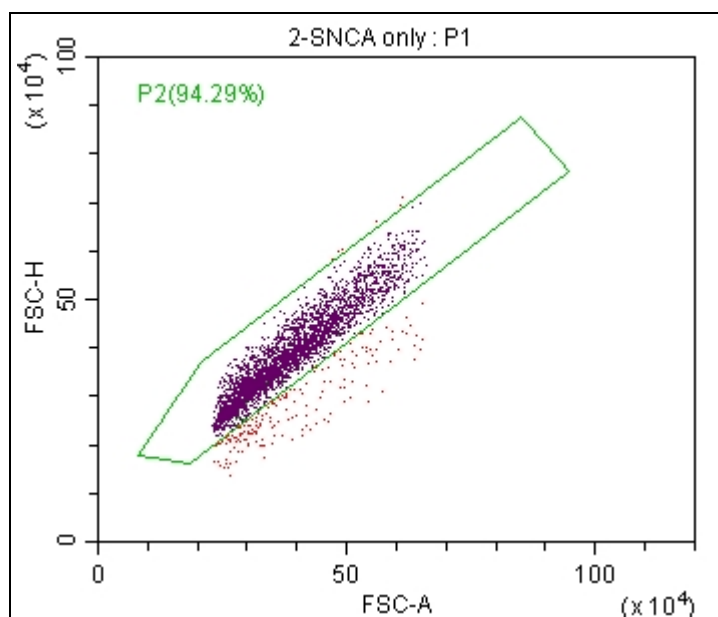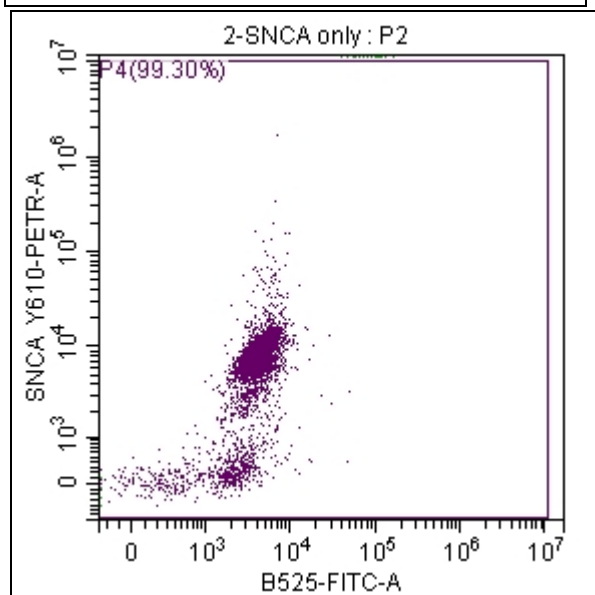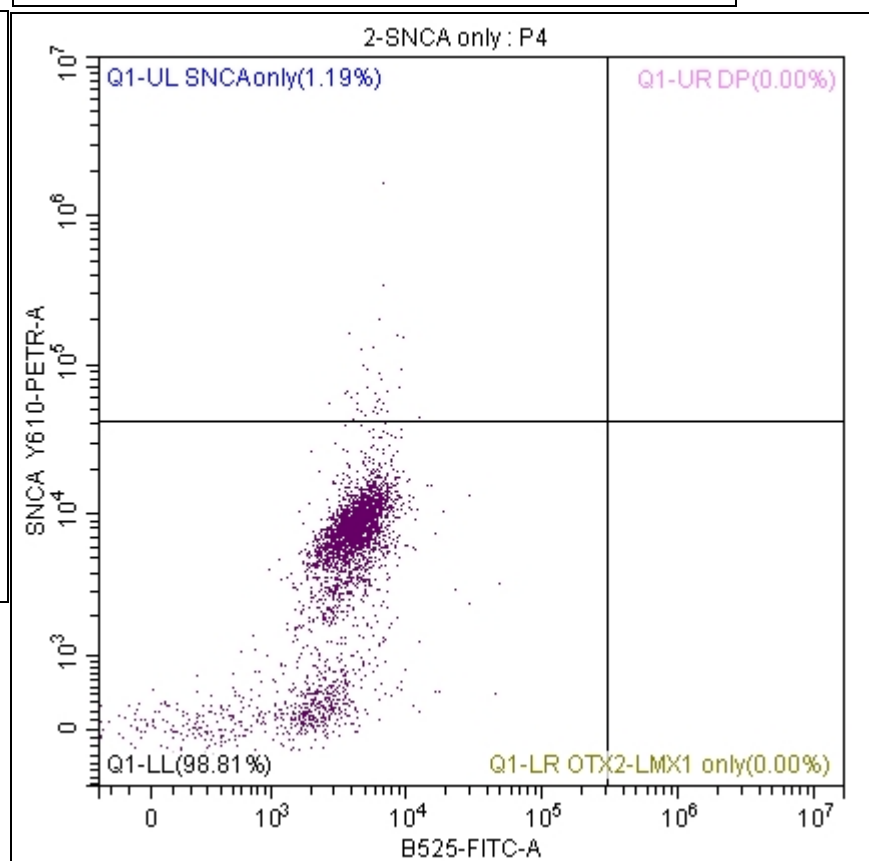

Tube Name: 2-SNCA only

Sample ID:

| Population             | Events | % Total | % Parent |
|------------------------|--------|---------|----------|
| ▼ ● All Events         | 25803  | 100.00% | 100.00%  |
| ▼ ● P1                 | 3327   | 12.89%  | 12.89%   |
| ▼ ● P2                 | 3137   | 12.16%  | 94.29%   |
| ▼ ● P4                 | 3115   | 12.07%  | 99.30%   |
| ● Q1-UR DP             | 0      | 0.00%   | 0.00%    |
| ● Q1-UL SNCA only      | 37     | 0.14%   | 1.19%    |
| ⊗ Q1-LL                | 3078   | 11.93%  | 98.81%   |
| ● Q1-LR OTX2-LMX1 only | 0      | 0.00%   | 0.00%    |

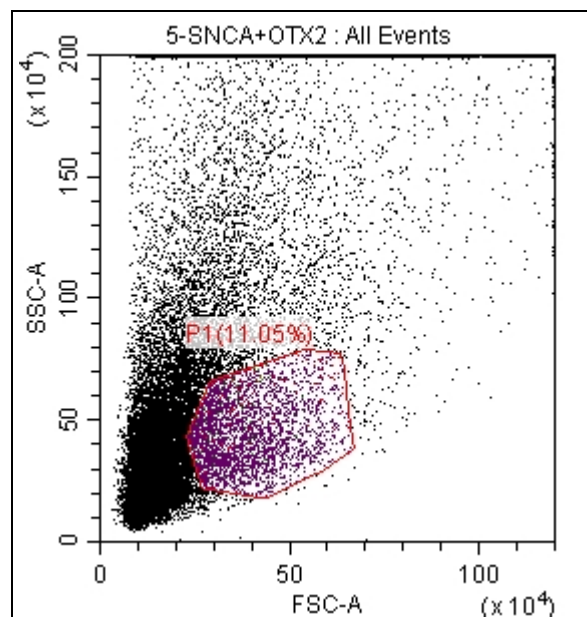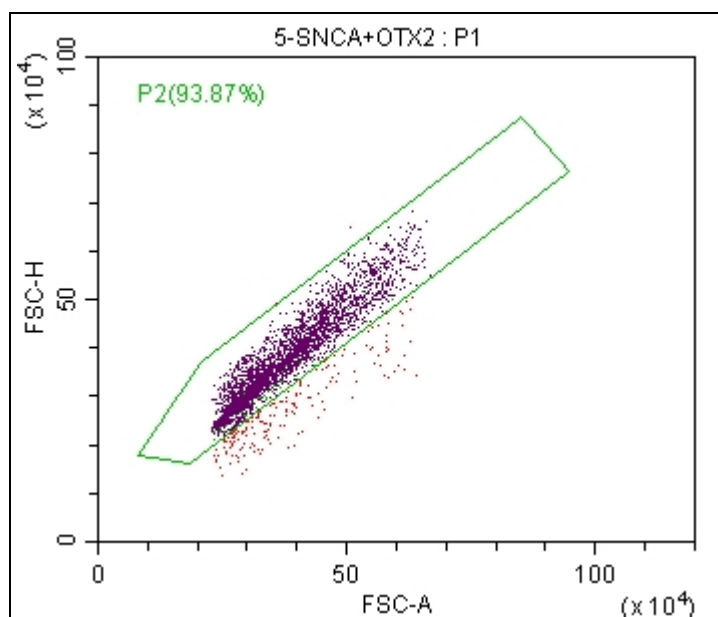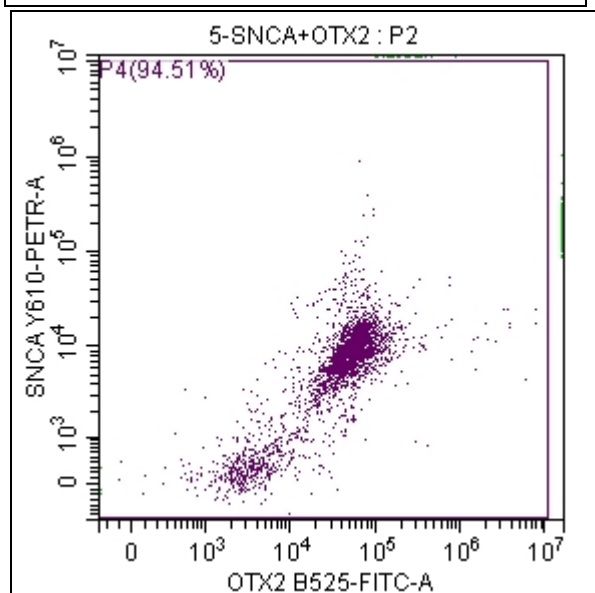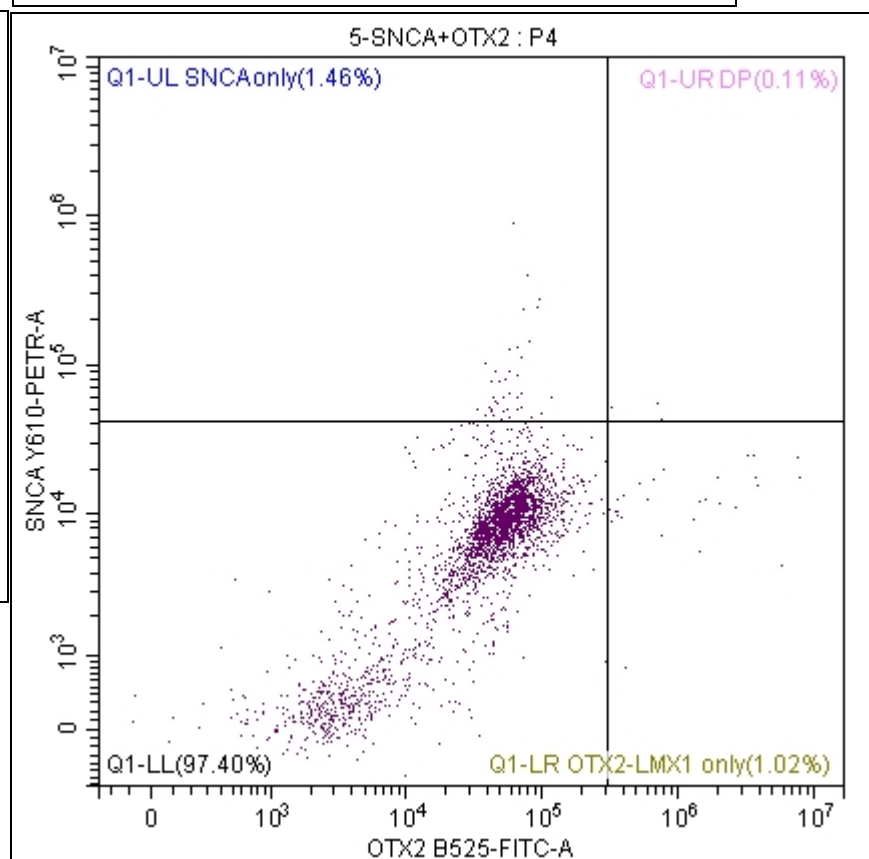

Tube Name: 5-SNCA+OTX2

Sample ID:

| Population             | Events | % Total | % Parent |
|------------------------|--------|---------|----------|
| ▼ ● All Events         | 27888  | 100.00% | 100.00%  |
| ▼ ● P1                 | 3083   | 11.05%  | 11.05%   |
| ▼ ● P2                 | 2894   | 10.38%  | 93.87%   |
| ▼ ● P4                 | 2735   | 9.81%   | 94.51%   |
| ● Q1-UR DP             | 3      | 0.01%   | 0.11%    |
| ● Q1-UL SNCA only      | 40     | 0.14%   | 1.46%    |
| ⊗ Q1-LL                | 2664   | 9.55%   | 97.40%   |
| ● Q1-LR OTX2-LMX1 only | 28     | 0.10%   | 1.02%    |

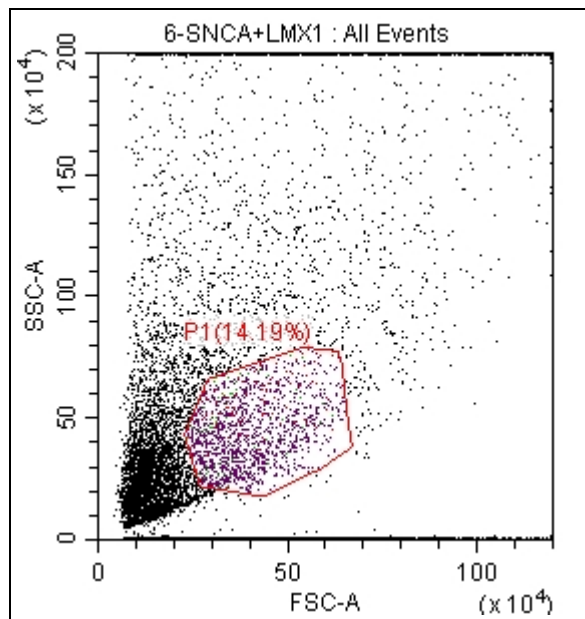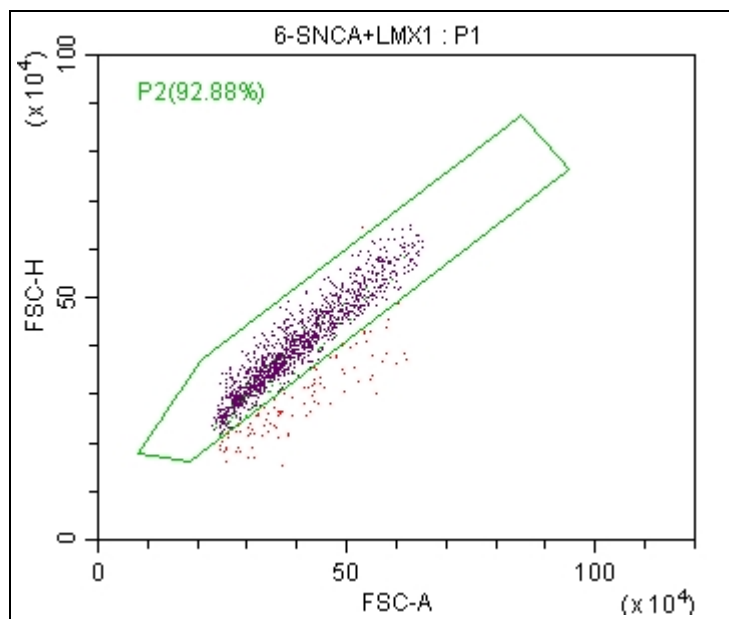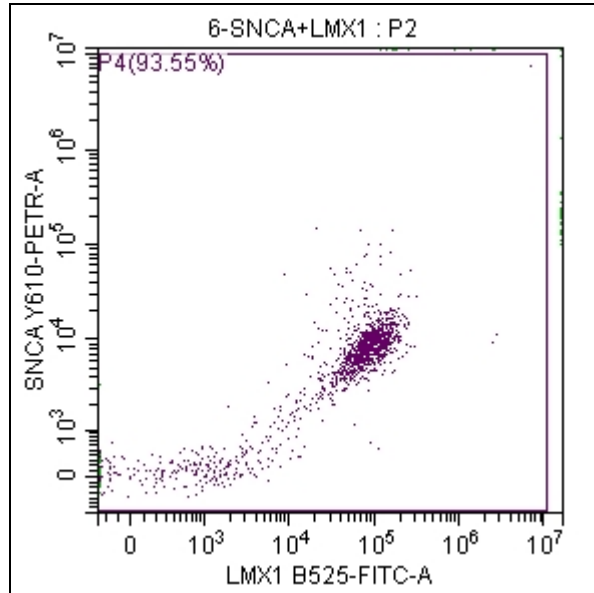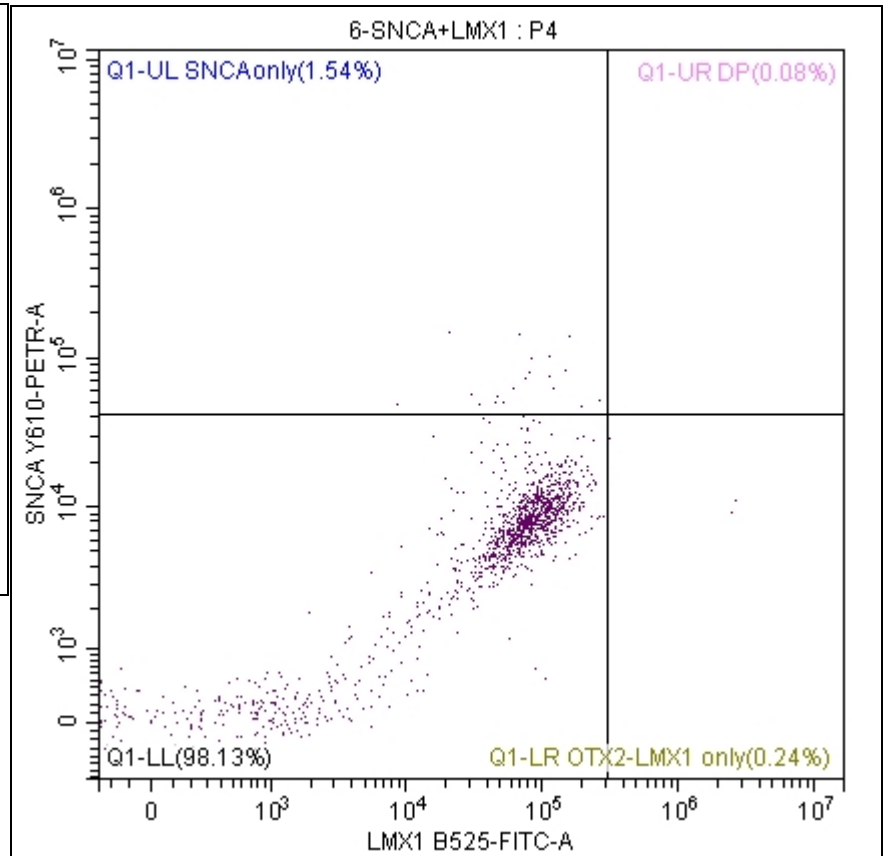

Tube Name: 6-SNCA+LMX1

Sample ID:

| Population           | Events | % Total | % Parent |
|----------------------|--------|---------|----------|
| ▼ All Events         | 10000  | 100.00% | 100.00%  |
| ▼ P1                 | 1419   | 14.19%  | 14.19%   |
| ▼ P2                 | 1318   | 13.18%  | 92.88%   |
| ▼ P4                 | 1233   | 12.33%  | 93.55%   |
| Q1-UR DP             | 1      | 0.01%   | 0.08%    |
| Q1-UL SNCA only      | 19     | 0.19%   | 1.54%    |
| Q1-LL                | 1210   | 12.10%  | 98.13%   |
| Q1-LR OTX2-LMX1 only | 3      | 0.03%   | 0.24%    |

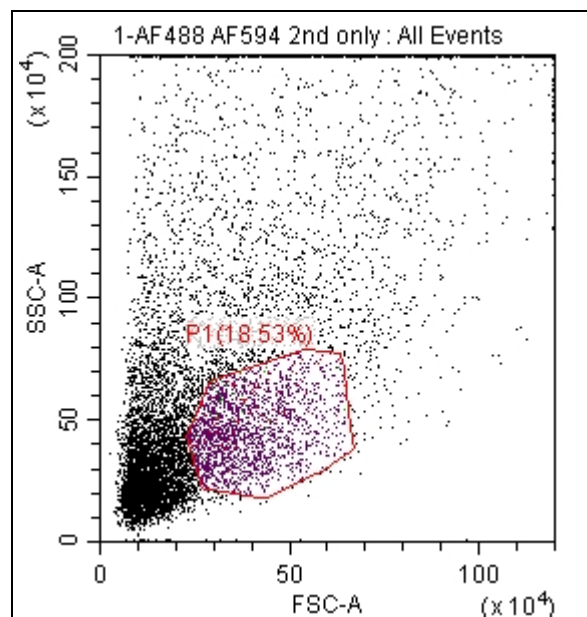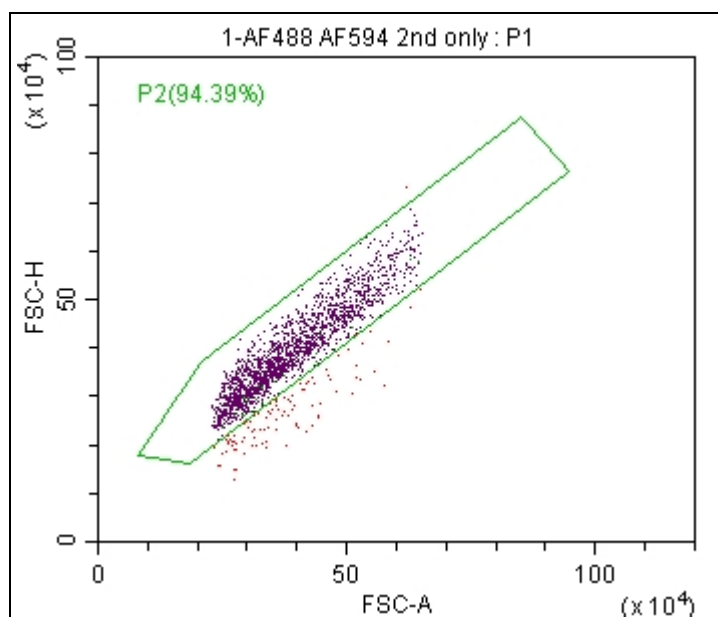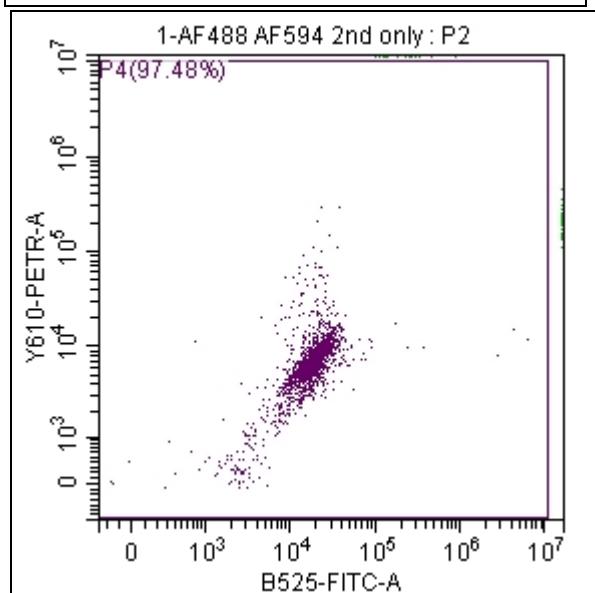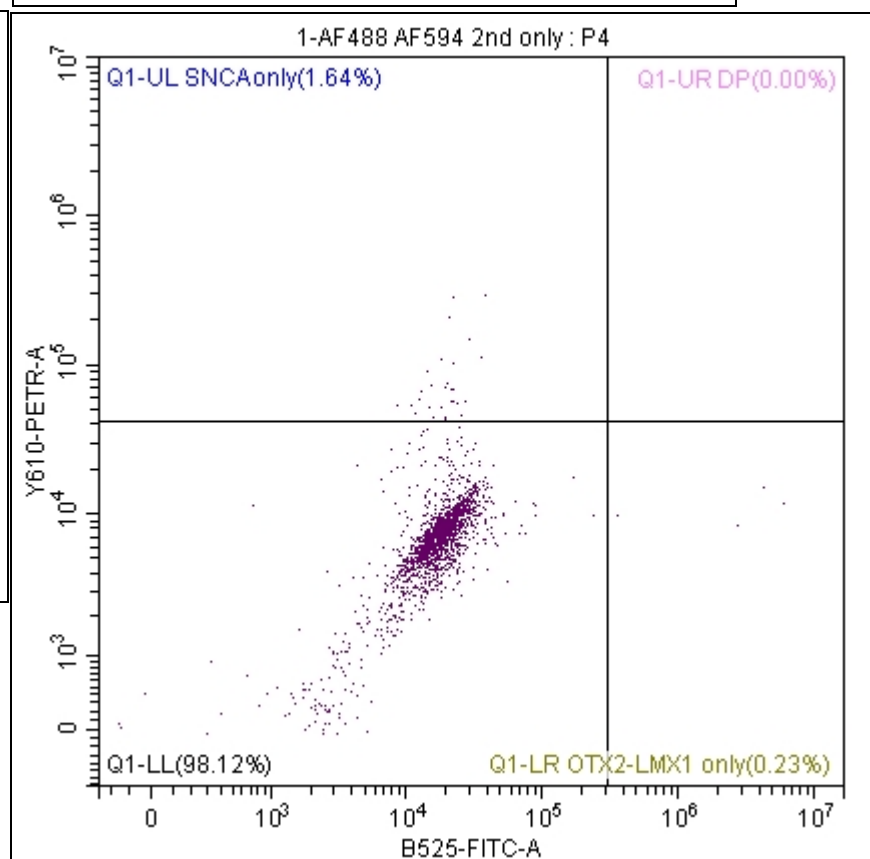

Tube Name: 1-AF488 AF594 2nd only

Sample ID:

| Population             | Events | % Total | % Parent |
|------------------------|--------|---------|----------|
| ▼ ● All Events         | 10000  | 100.00% | 100.00%  |
| ▼ ● P1                 | 1853   | 18.53%  | 18.53%   |
| ▼ ● P2                 | 1749   | 17.49%  | 94.39%   |
| ▼ ● P4                 | 1705   | 17.05%  | 97.48%   |
| ● Q1-UR DP             | 0      | 0.00%   | 0.00%    |
| ● Q1-UL SNCA only      | 28     | 0.28%   | 1.64%    |
| ⊗ Q1-LL                | 1673   | 16.73%  | 98.12%   |
| ● Q1-LR OTX2-LMX1 only | 4      | 0.04%   | 0.23%    |



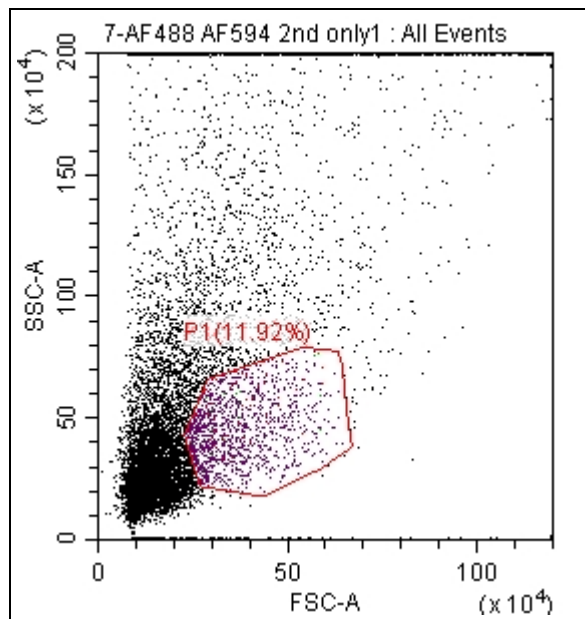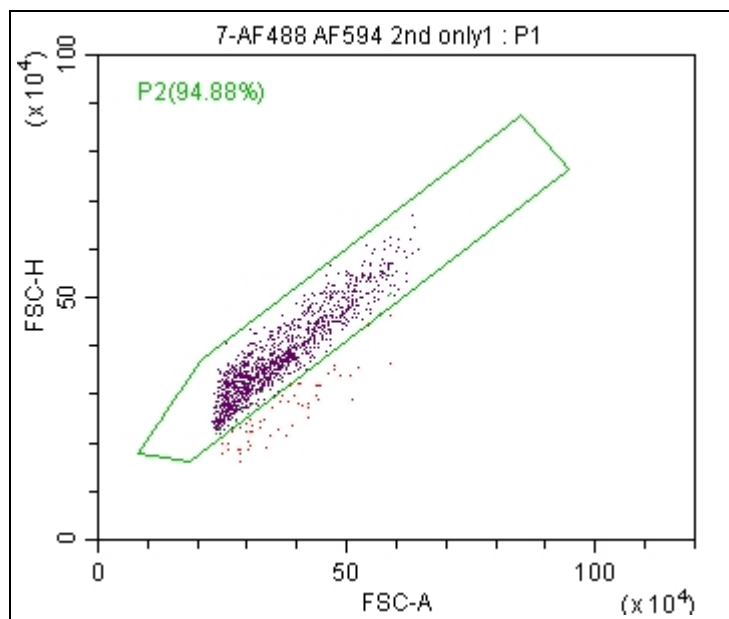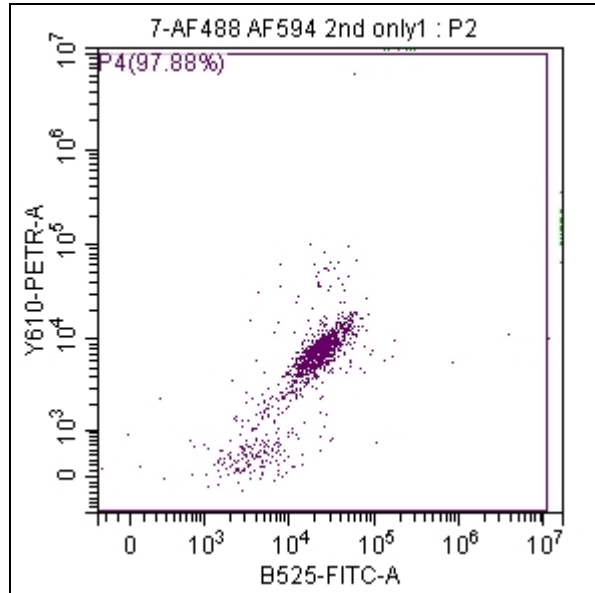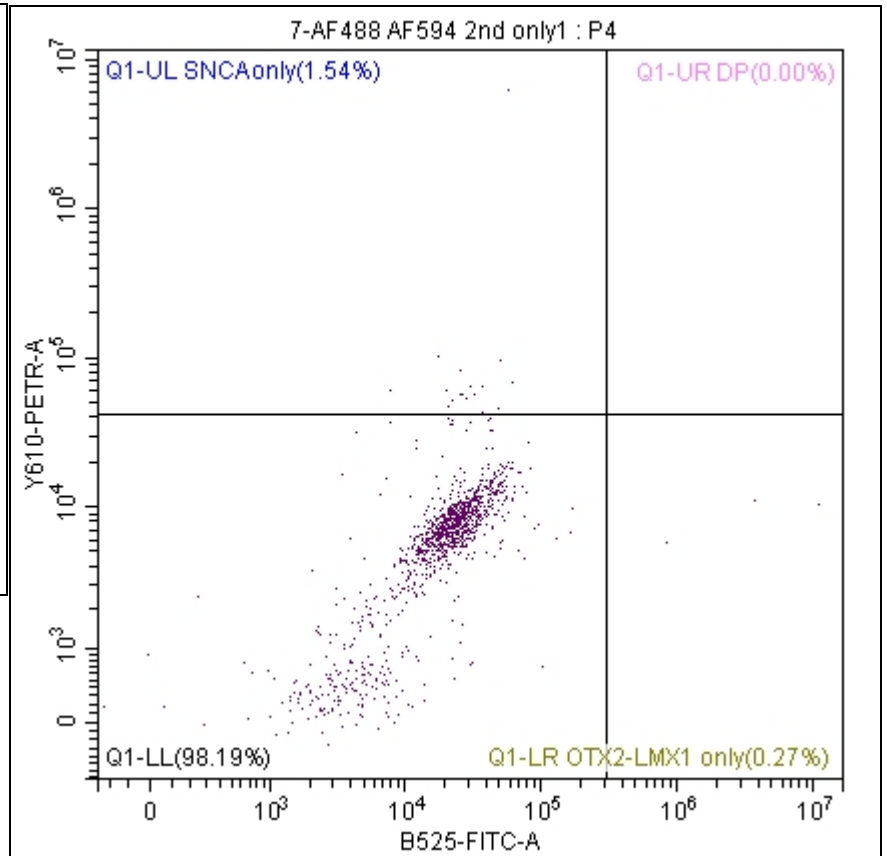

Tube Name: 7-AF488 AF594 2nd only1

Sample ID:

| Population             | Events | % Total | % Parent |
|------------------------|--------|---------|----------|
| ▼ ● All Events         | 10000  | 100.00% | 100.00%  |
| ▼ ● P1                 | 1192   | 11.92%  | 11.92%   |
| ▼ ● P2                 | 1131   | 11.31%  | 94.88%   |
| ▼ ● P4                 | 1107   | 11.07%  | 97.88%   |
| ● Q1-UR DP             | 0      | 0.00%   | 0.00%    |
| ● Q1-UL SNCA only      | 17     | 0.17%   | 1.54%    |
| ⊗ Q1-LL                | 1087   | 10.87%  | 98.19%   |
| ● Q1-LR OTX2-LMX1 only | 3      | 0.03%   | 0.27%    |

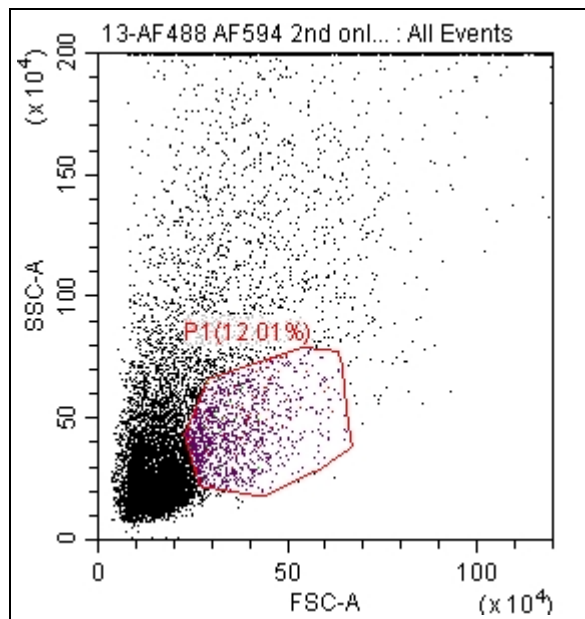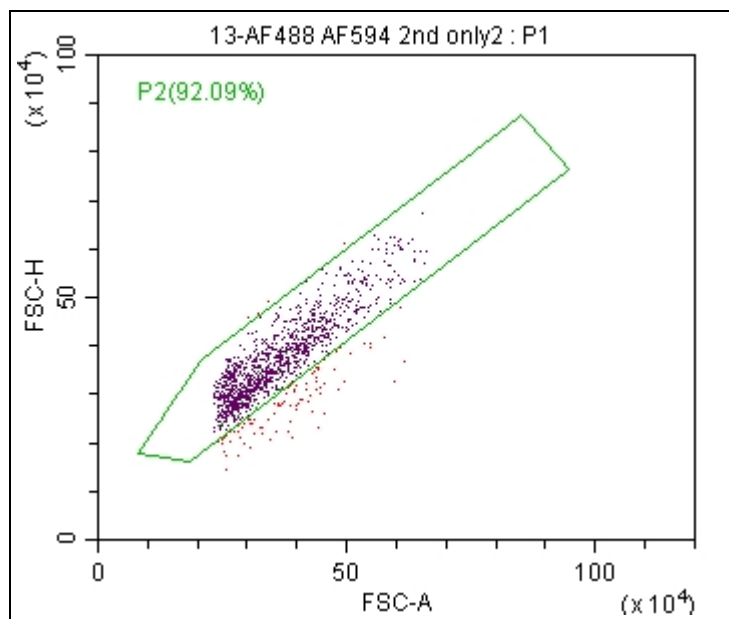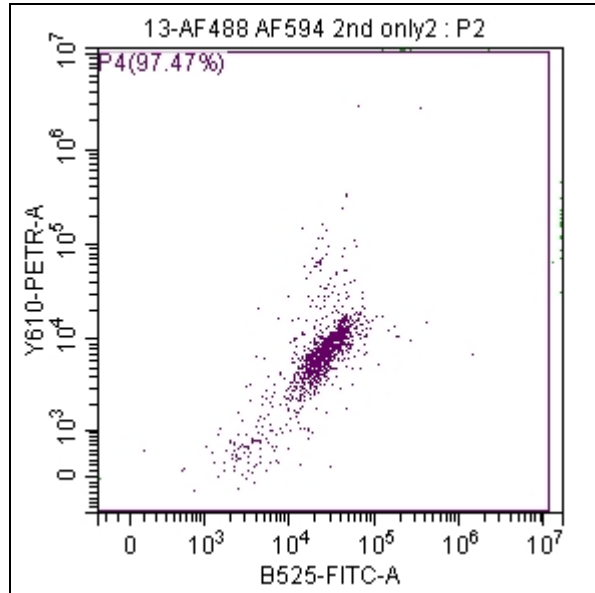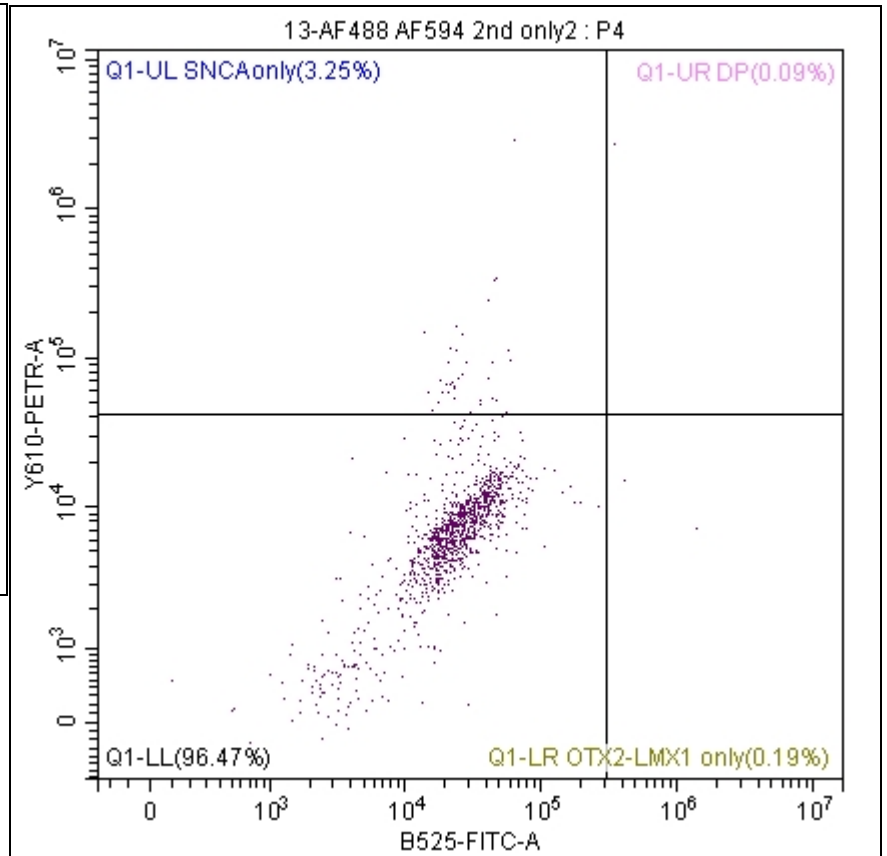

Tube Name: 13-AF488 AF594 2nd only2

Sample ID:

| Population             | Events | % Total | % Parent |
|------------------------|--------|---------|----------|
| ▼ ● All Events         | 10000  | 100.00% | 100.00%  |
| ▼ ● P1                 | 1201   | 12.01%  | 12.01%   |
| ▼ ● P2                 | 1106   | 11.06%  | 92.09%   |
| ▼ ● P4                 | 1078   | 10.78%  | 97.47%   |
| ● Q1-UR DP             | 1      | 0.01%   | 0.09%    |
| ● Q1-UL SNCA only      | 35     | 0.35%   | 3.25%    |
| ⊗ Q1-LL                | 1040   | 10.40%  | 96.47%   |
| ● Q1-LR OTX2-LMX1 only | 2      | 0.02%   | 0.19%    |



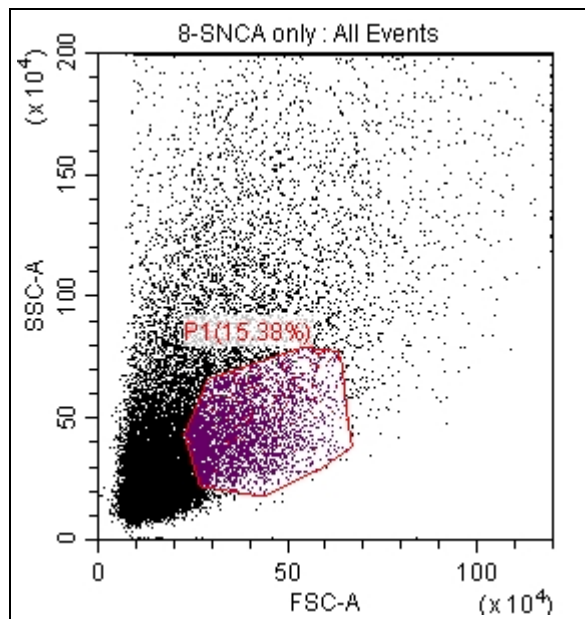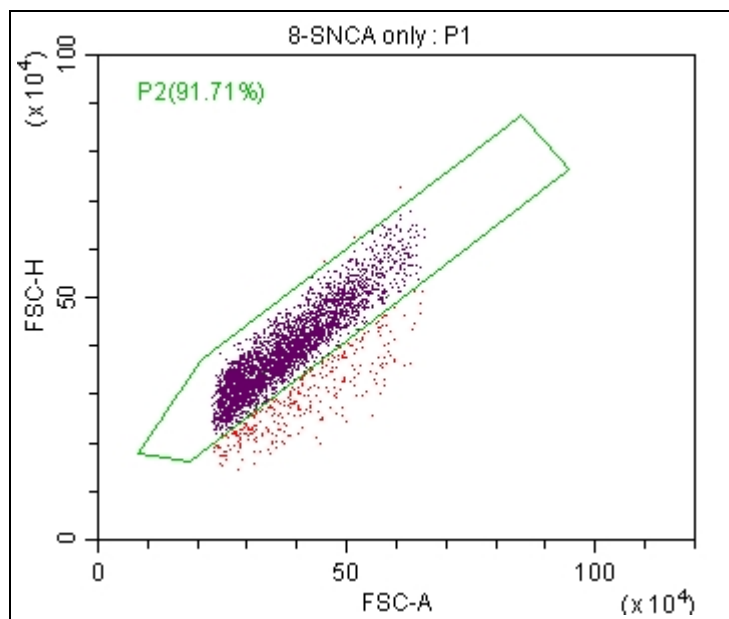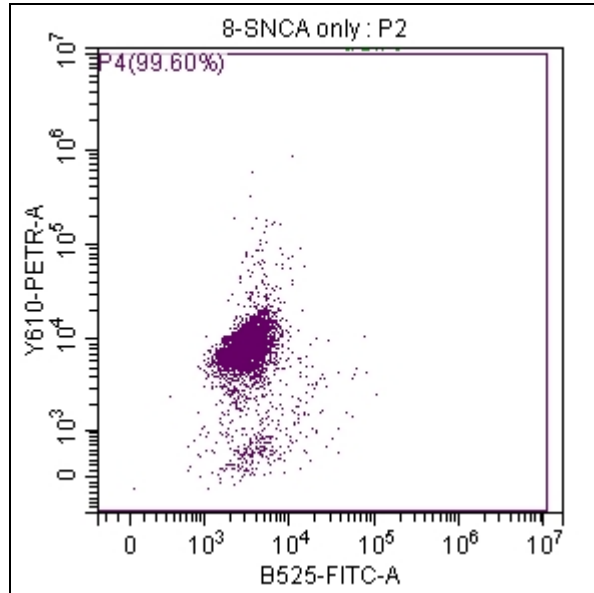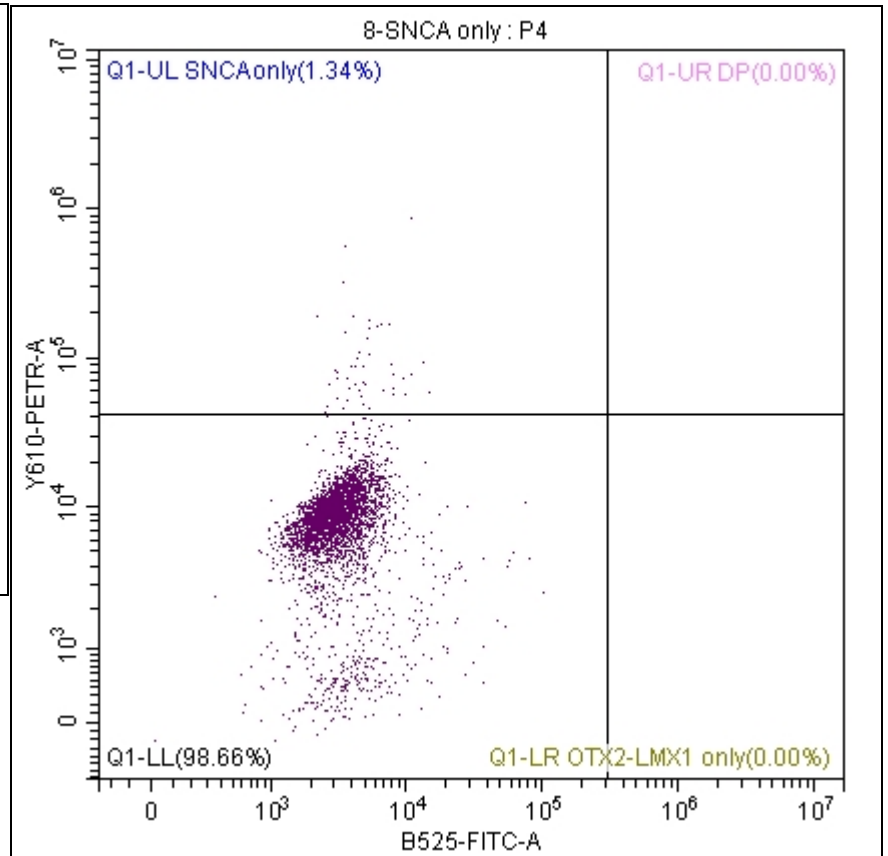

Tube Name: 8-SNCA only

Sample ID:

| Population             | Events | % Total | % Parent |
|------------------------|--------|---------|----------|
| ▼ ● All Events         | 25000  | 100.00% | 100.00%  |
| ▼ ● P1                 | 3846   | 15.38%  | 15.38%   |
| ▼ ● P2                 | 3527   | 14.11%  | 91.71%   |
| ▼ ● P4                 | 3513   | 14.05%  | 99.60%   |
| ● Q1-UR DP             | 0      | 0.00%   | 0.00%    |
| ● Q1-UL SNCA only      | 47     | 0.19%   | 1.34%    |
| ⊗ Q1-LL                | 3466   | 13.86%  | 98.66%   |
| ● Q1-LR OTX2-LMX1 only | 0      | 0.00%   | 0.00%    |

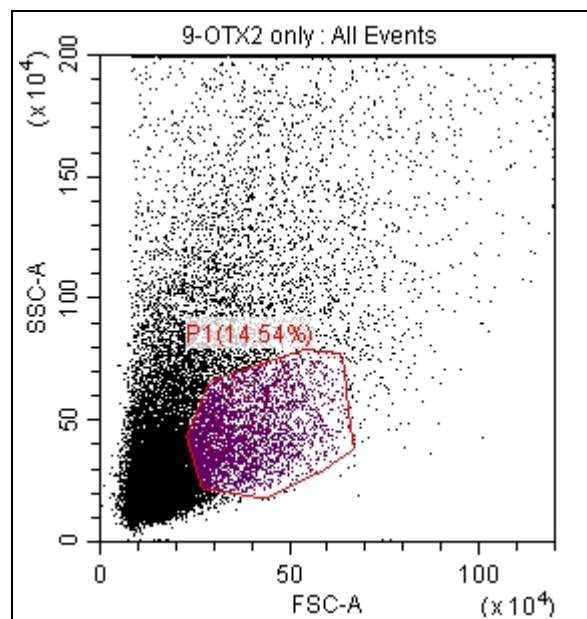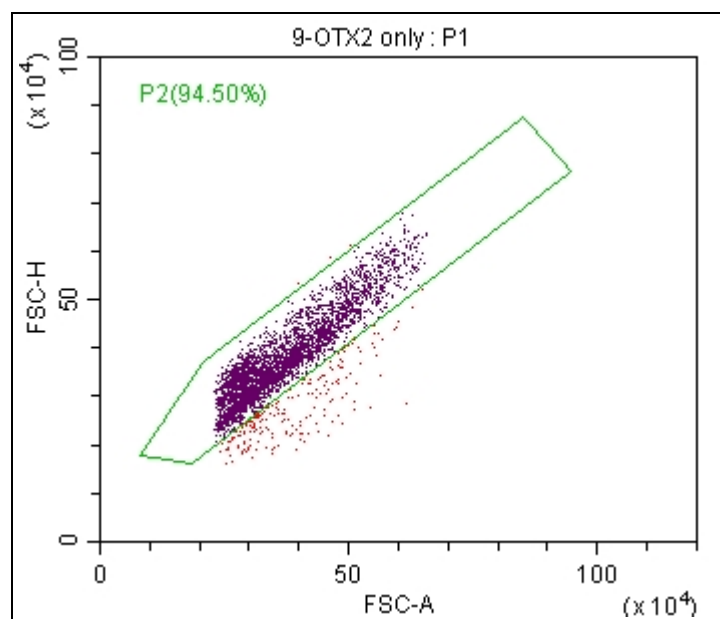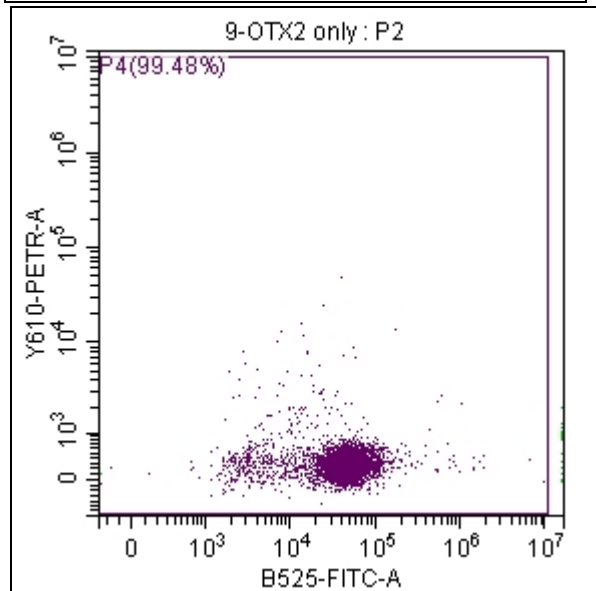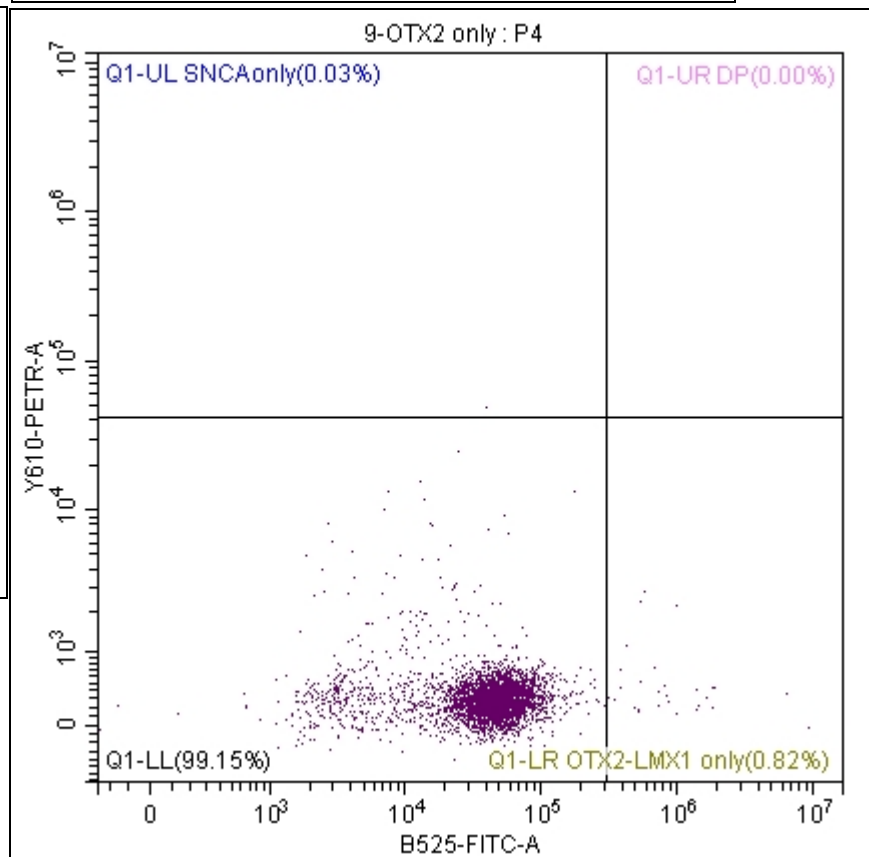

Tube Name: 9-OTX2 only

Sample ID:

| Population             | Events | % Total | % Parent |
|------------------------|--------|---------|----------|
| ▼ ● All Events         | 25000  | 100.00% | 100.00%  |
| ▼ ● P1                 | 3635   | 14.54%  | 14.54%   |
| ▼ ● P2                 | 3435   | 13.74%  | 94.50%   |
| ▼ ● P4                 | 3417   | 13.67%  | 99.48%   |
| ● Q1-UR DP             | 0      | 0.00%   | 0.00%    |
| ● Q1-UL SNCA only      | 1      | 0.00%   | 0.03%    |
| ⊗ Q1-LL                | 3388   | 13.55%  | 99.15%   |
| ● Q1-LR OTX2-LMX1 only | 28     | 0.11%   | 0.82%    |

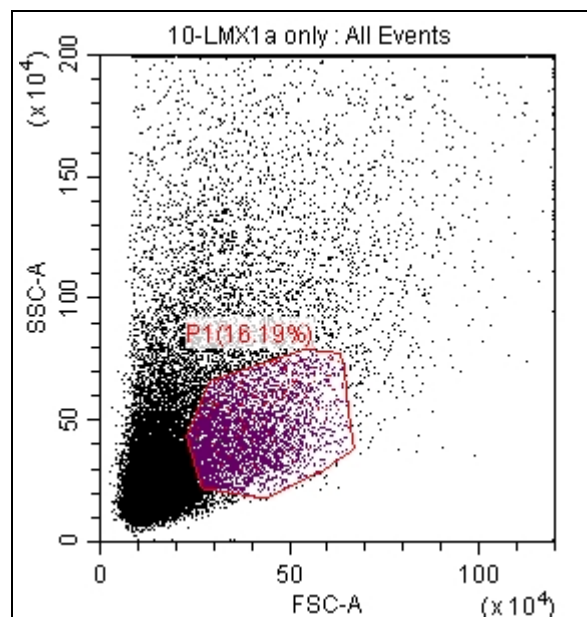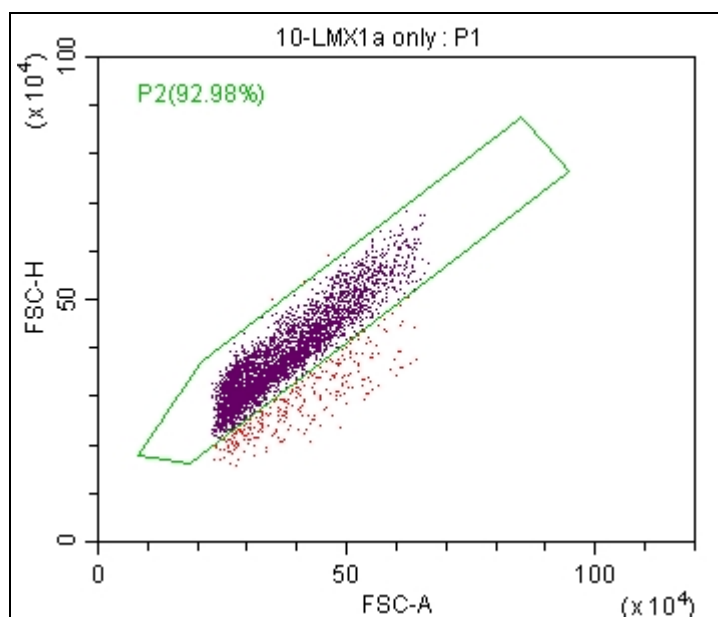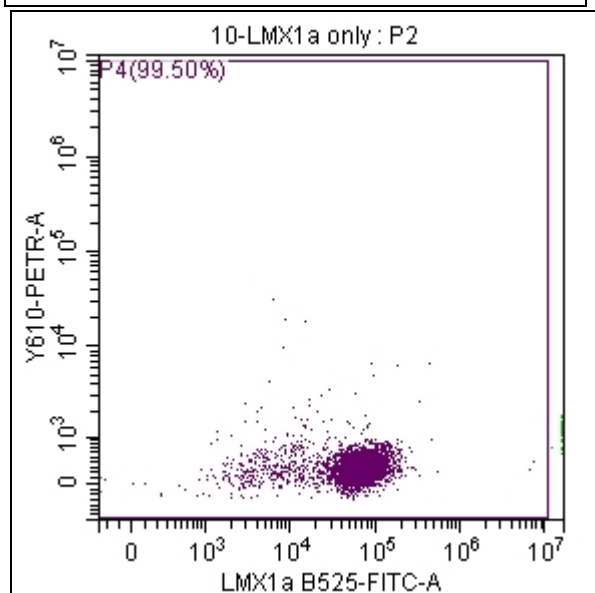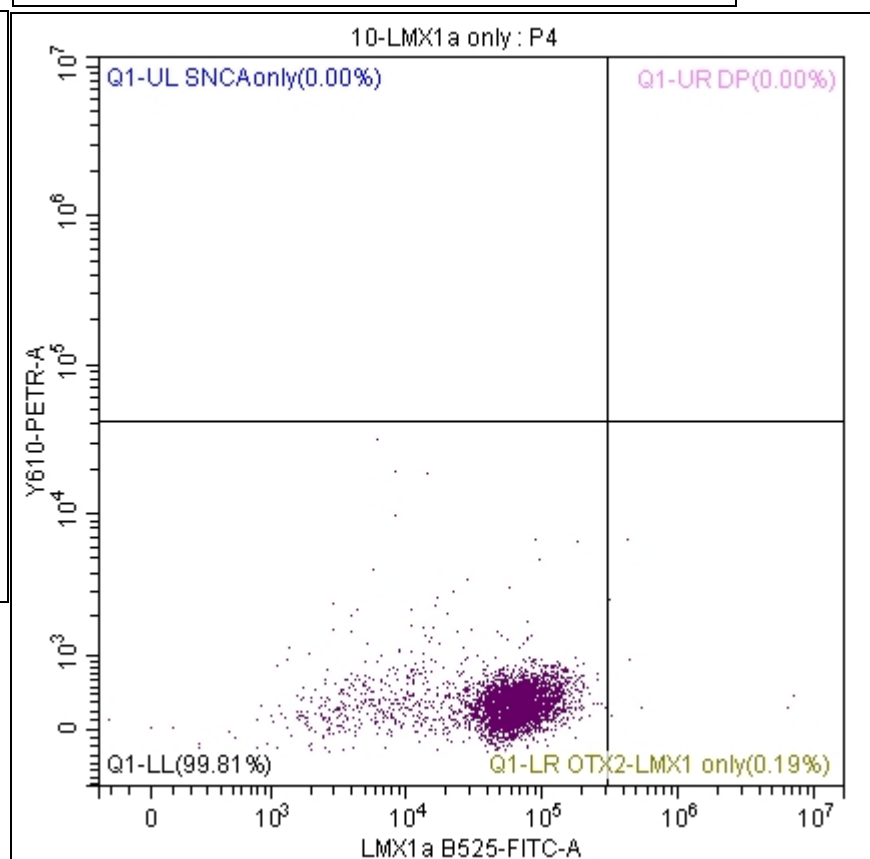

Tube Name: 10-LMX1a only

Sample ID:

| Population           | Events | % Total | % Parent |
|----------------------|--------|---------|----------|
| ▼ All Events         | 25000  | 100.00% | 100.00%  |
| ▼ P1                 | 4047   | 16.19%  | 16.19%   |
| ▼ P2                 | 3763   | 15.05%  | 92.98%   |
| ▼ P4                 | 3744   | 14.98%  | 99.50%   |
| Q1-UR DP             | 0      | 0.00%   | 0.00%    |
| Q1-UL SNCA only      | 0      | 0.00%   | 0.00%    |
| Q1-LL                | 3737   | 14.95%  | 99.81%   |
| Q1-LR OTX2-LMX1 only | 7      | 0.03%   | 0.19%    |

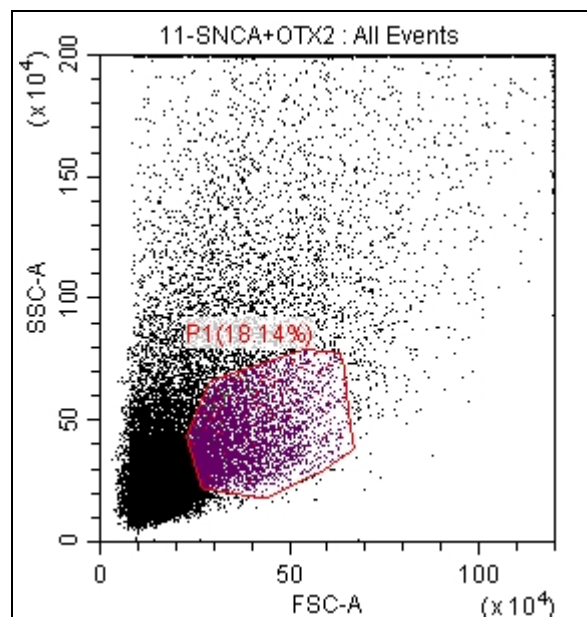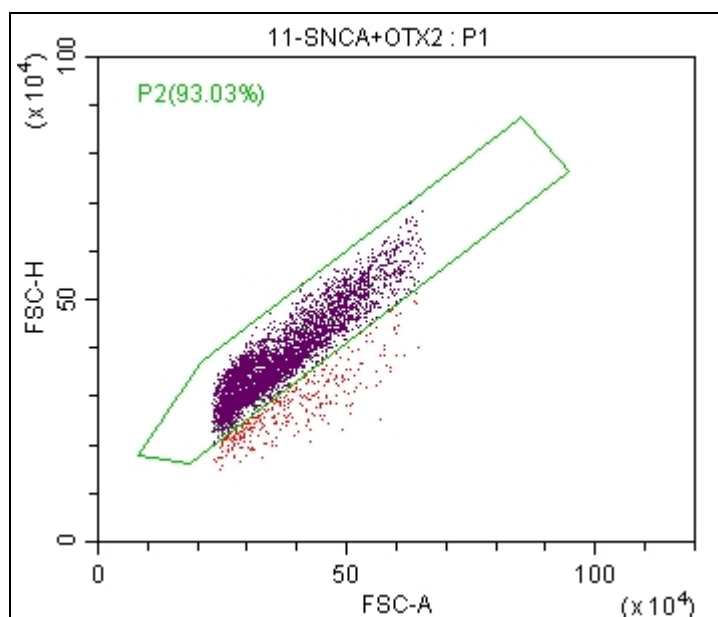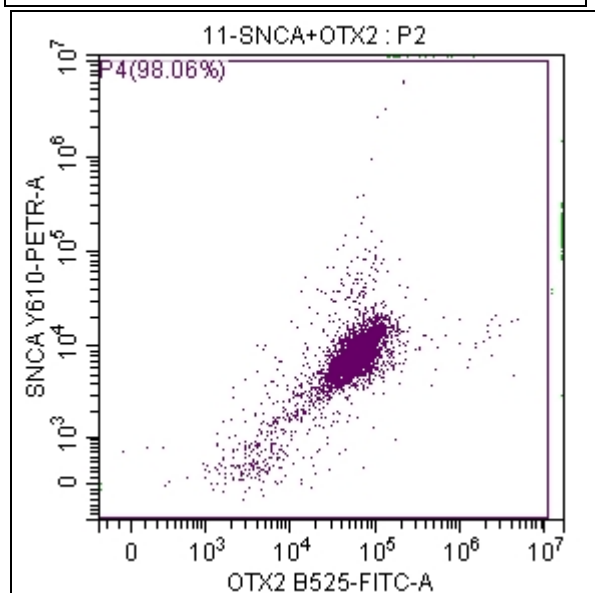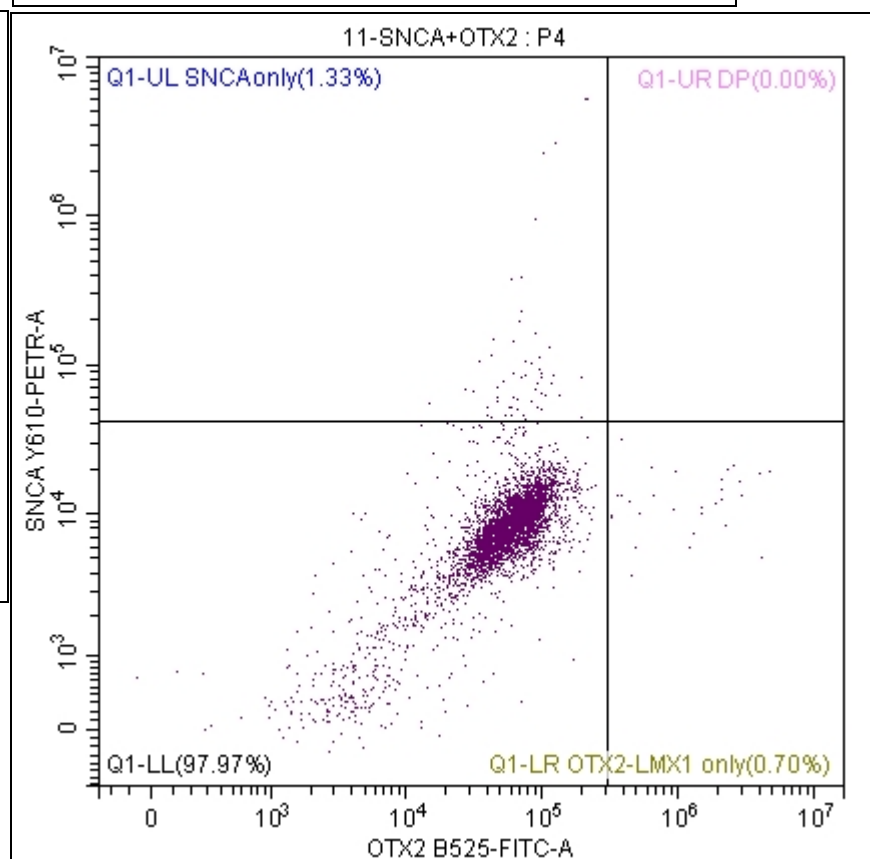

Tube Name: 11-SNCA+OTX2

Sample ID:

| Population           | Events | % Total | % Parent |
|----------------------|--------|---------|----------|
| ▼ All Events         | 25000  | 100.00% | 100.00%  |
| ▼ P1                 | 4535   | 18.14%  | 18.14%   |
| ▼ P2                 | 4219   | 16.88%  | 93.03%   |
| ▼ P4                 | 4137   | 16.55%  | 98.06%   |
| Q1-UR DP             | 0      | 0.00%   | 0.00%    |
| Q1-UL SNCA only      | 55     | 0.22%   | 1.33%    |
| Q1-LL                | 4053   | 16.21%  | 97.97%   |
| Q1-LR OTX2-LMX1 only | 29     | 0.12%   | 0.70%    |

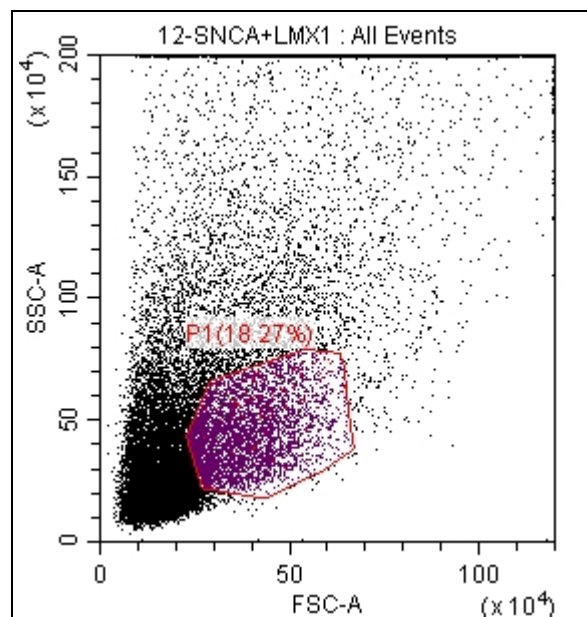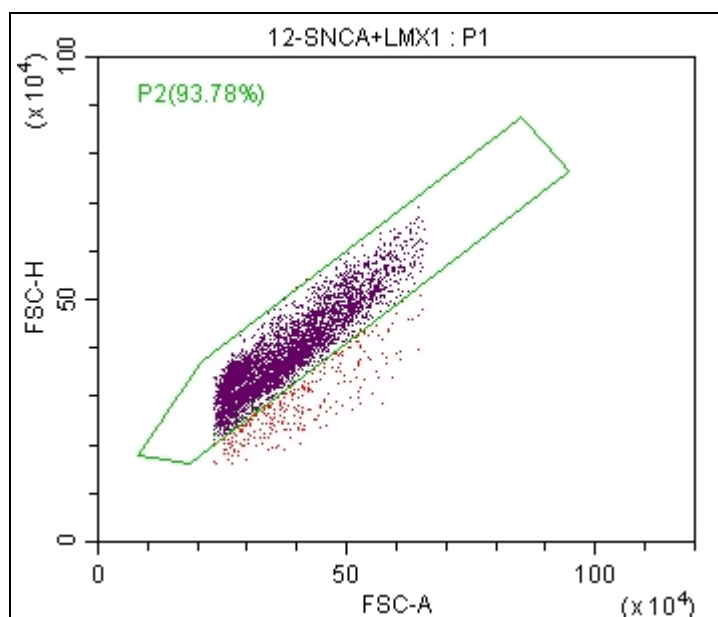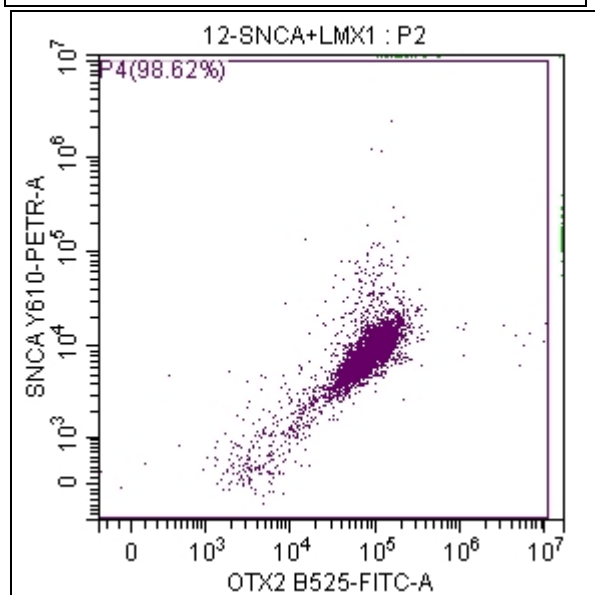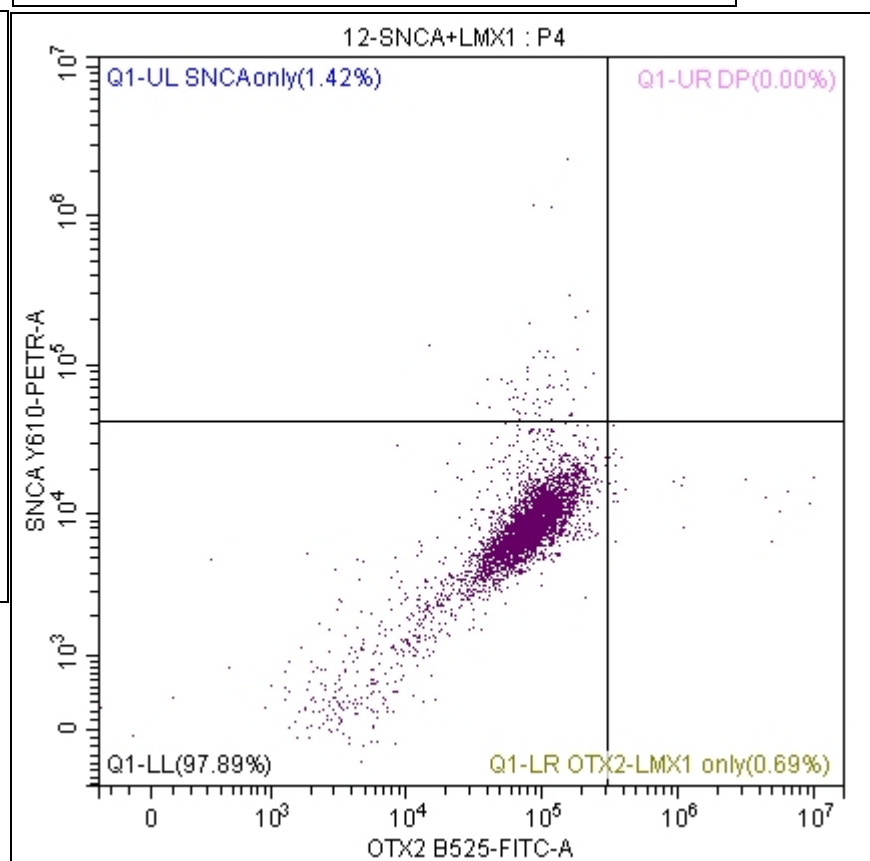

Tube Name: 12-SNCA+LMX1

Sample ID:

| Population             | Events | % Total | % Parent |
|------------------------|--------|---------|----------|
| ▼ ● All Events         | 25000  | 100.00% | 100.00%  |
| ▼ ● P1                 | 4567   | 18.27%  | 18.27%   |
| ▼ ● P2                 | 4283   | 17.13%  | 93.78%   |
| ▼ ● P4                 | 4224   | 16.90%  | 98.62%   |
| ● Q1-UR DP             | 0      | 0.00%   | 0.00%    |
| ● Q1-UL SNCA only      | 60     | 0.24%   | 1.42%    |
| ⊗ Q1-LL                | 4135   | 16.54%  | 97.89%   |
| ● Q1-LR OTX2-LMX1 only | 29     | 0.12%   | 0.69%    |

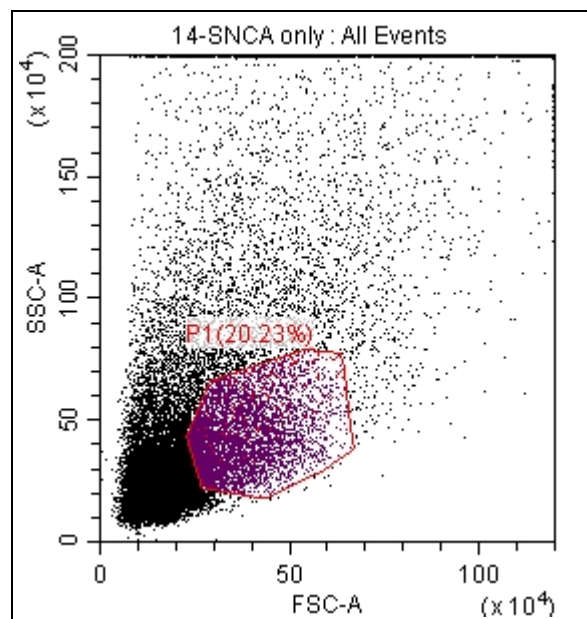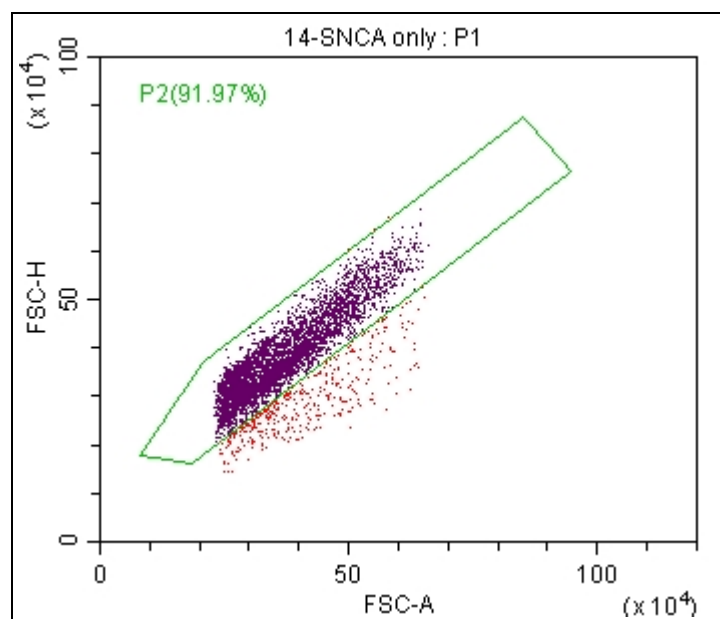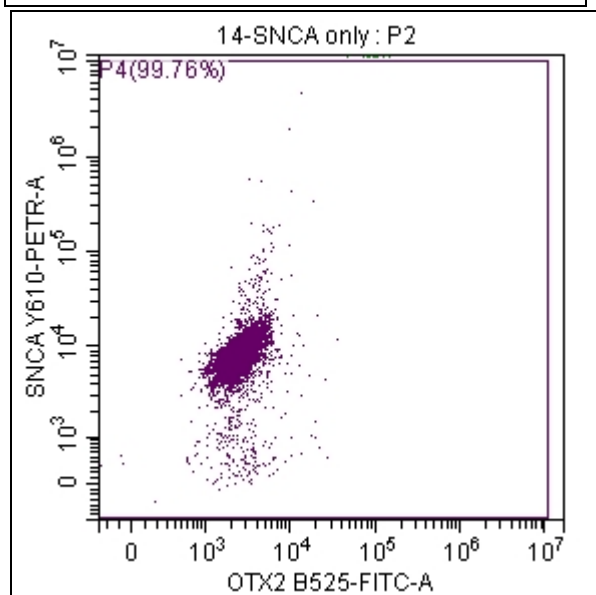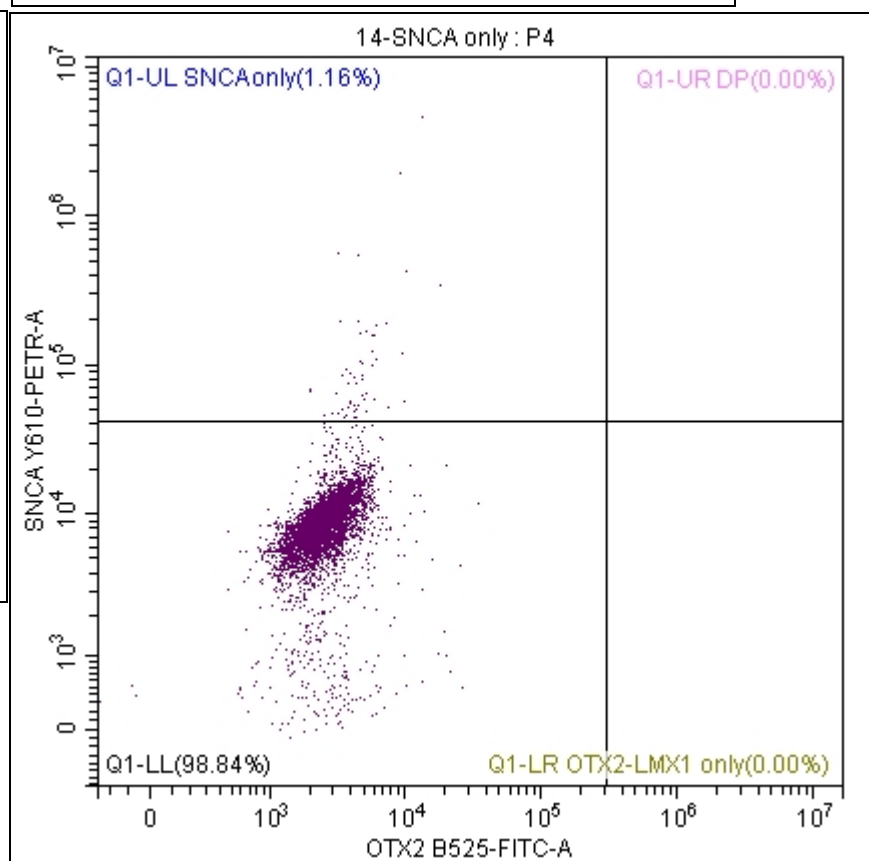

Tube Name: 14-SNCA only

Sample ID:

| Population             | Events | % Total | % Parent |
|------------------------|--------|---------|----------|
| ▼ ● All Events         | 25000  | 100.00% | 100.00%  |
| ▼ ● P1                 | 5058   | 20.23%  | 20.23%   |
| ▼ ● P2                 | 4652   | 18.61%  | 91.97%   |
| ▼ ● P4                 | 4641   | 18.56%  | 99.76%   |
| ● Q1-UR DP             | 0      | 0.00%   | 0.00%    |
| ● Q1-UL SNCA only      | 54     | 0.22%   | 1.16%    |
| ⊗ Q1-LL                | 4587   | 18.35%  | 98.84%   |
| ● Q1-LR OTX2-LMX1 only | 0      | 0.00%   | 0.00%    |



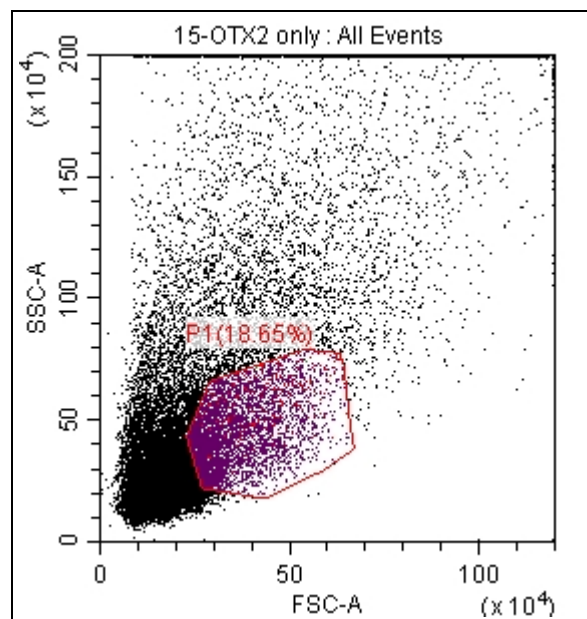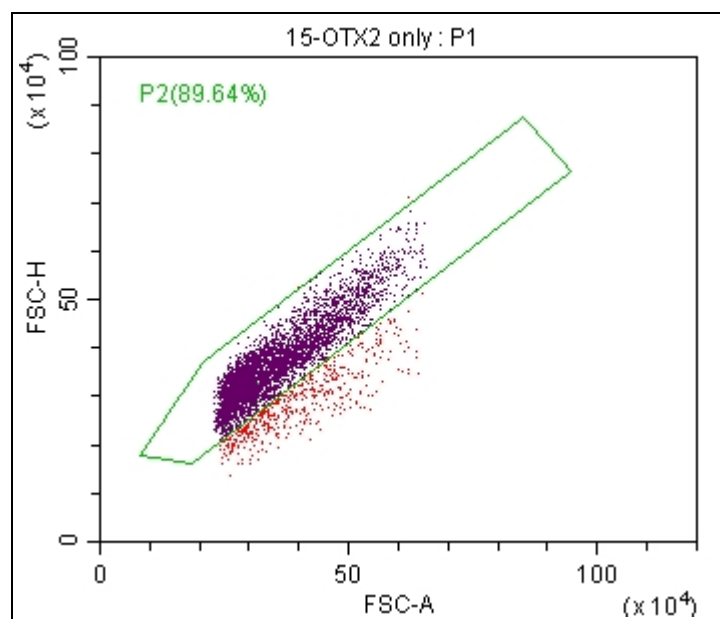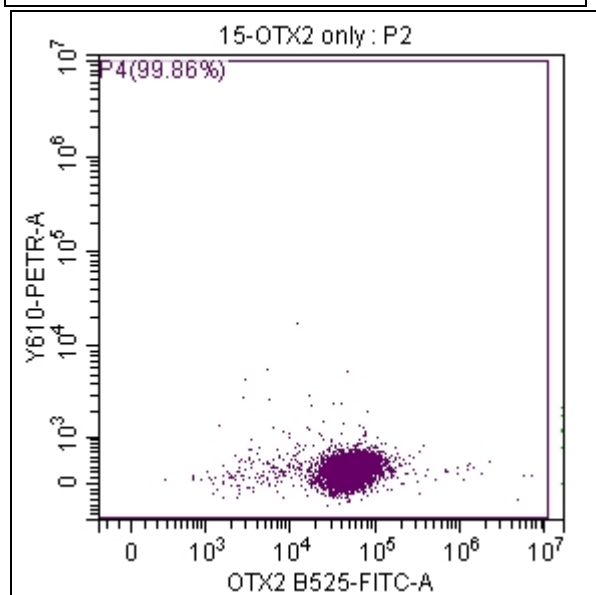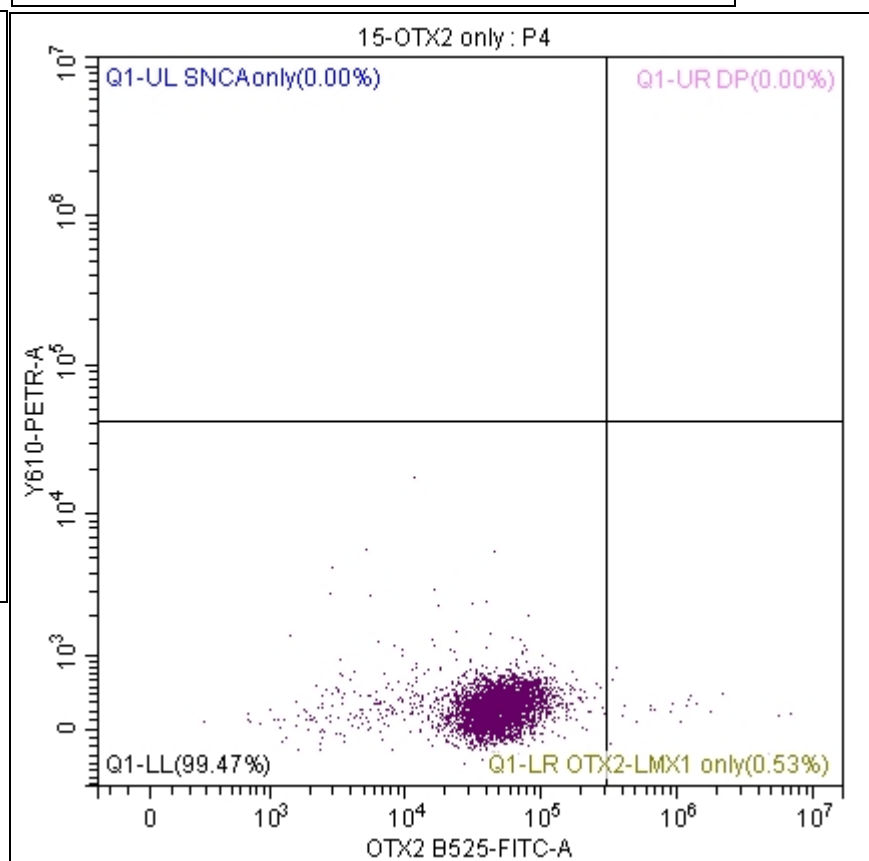

Tube Name: 15-OTX2 only

Sample ID:

| Population             | Events | % Total | % Parent |
|------------------------|--------|---------|----------|
| ▼ ● All Events         | 25000  | 100.00% | 100.00%  |
| ▼ ● P1                 | 4662   | 18.65%  | 18.65%   |
| ▼ ● P2                 | 4179   | 16.72%  | 89.64%   |
| ▼ ● P4                 | 4173   | 16.69%  | 99.86%   |
| ● Q1-UR DP             | 0      | 0.00%   | 0.00%    |
| ● Q1-UL SNCA only      | 0      | 0.00%   | 0.00%    |
| ⊗ Q1-LL                | 4151   | 16.60%  | 99.47%   |
| ● Q1-LR OTX2-LMX1 only | 22     | 0.09%   | 0.53%    |



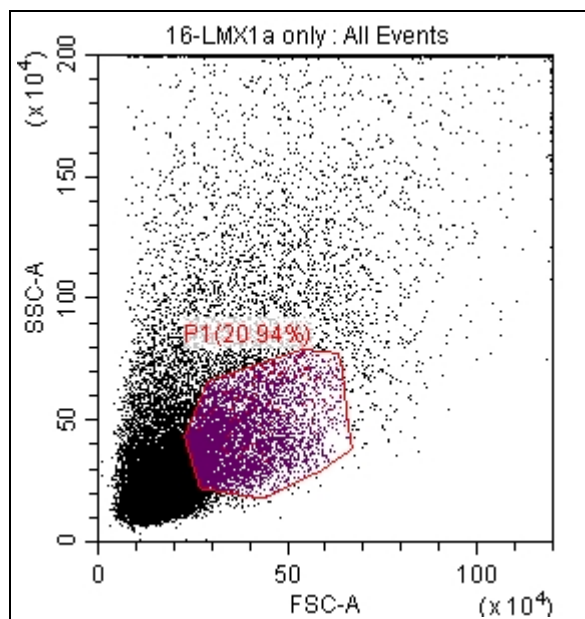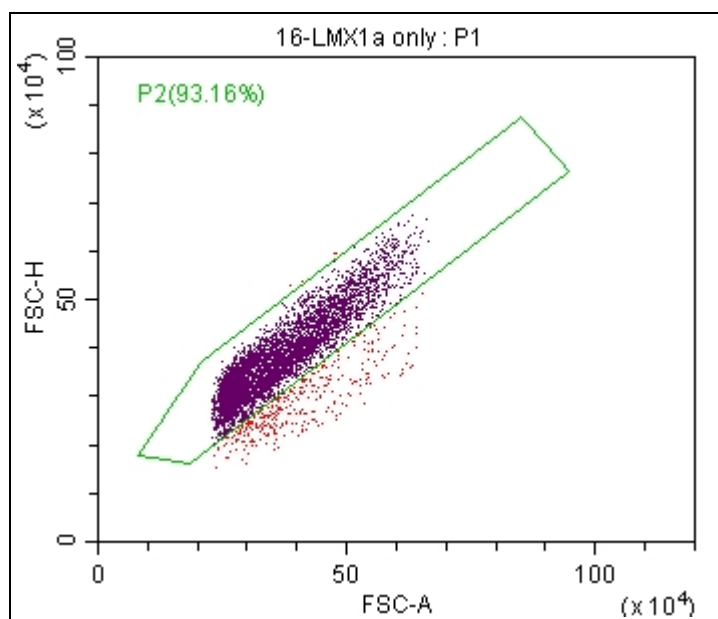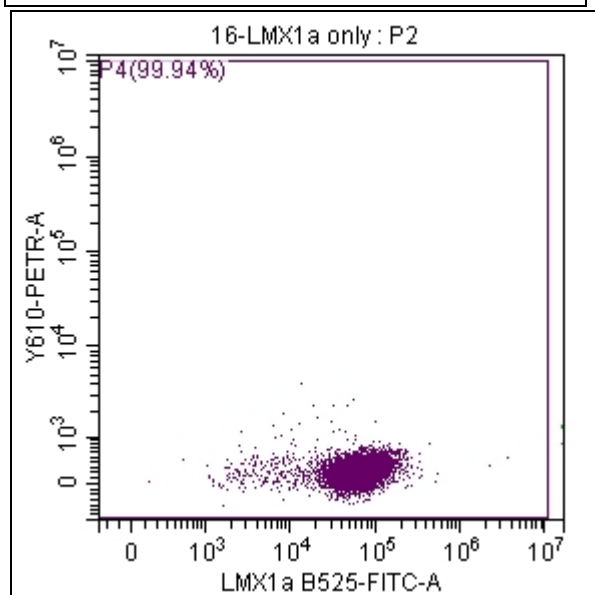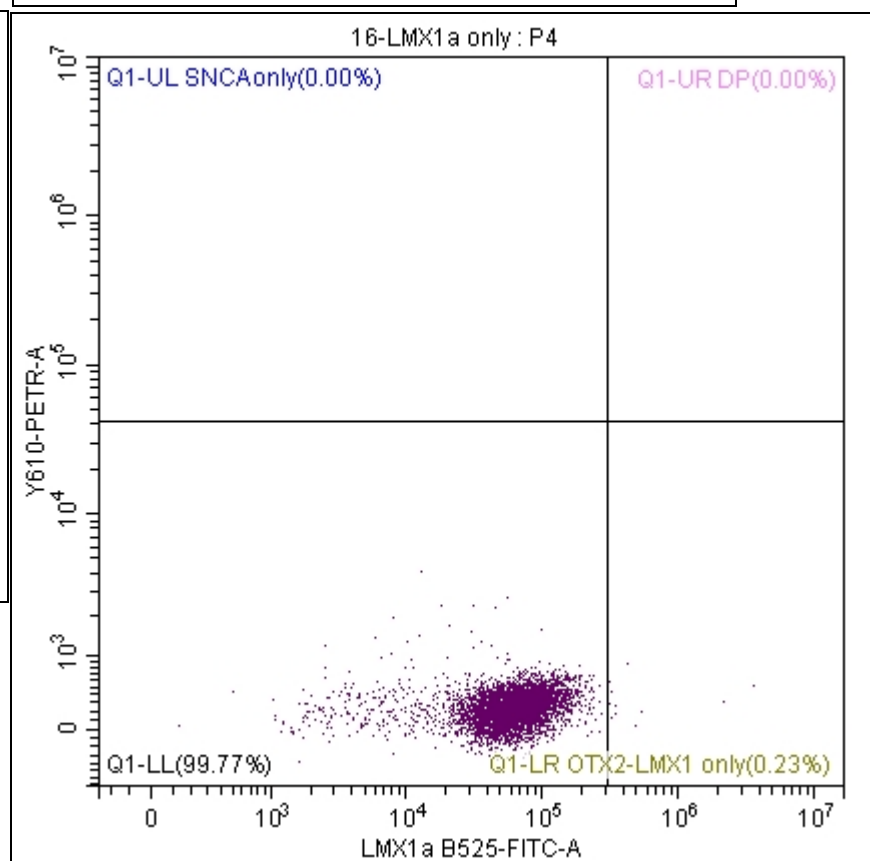

Tube Name: 16-LMX1a only

Sample ID:

| Population           | Events | % Total | % Parent |
|----------------------|--------|---------|----------|
| ▼ All Events         | 25000  | 100.00% | 100.00%  |
| ▼ P1                 | 5234   | 20.94%  | 20.94%   |
| ▼ P2                 | 4876   | 19.50%  | 93.16%   |
| ▼ P4                 | 4873   | 19.49%  | 99.94%   |
| Q1-UR DP             | 0      | 0.00%   | 0.00%    |
| Q1-UL SNCA only      | 0      | 0.00%   | 0.00%    |
| Q1-LL                | 4862   | 19.45%  | 99.77%   |
| Q1-LR OTX2-LMX1 only | 11     | 0.04%   | 0.23%    |

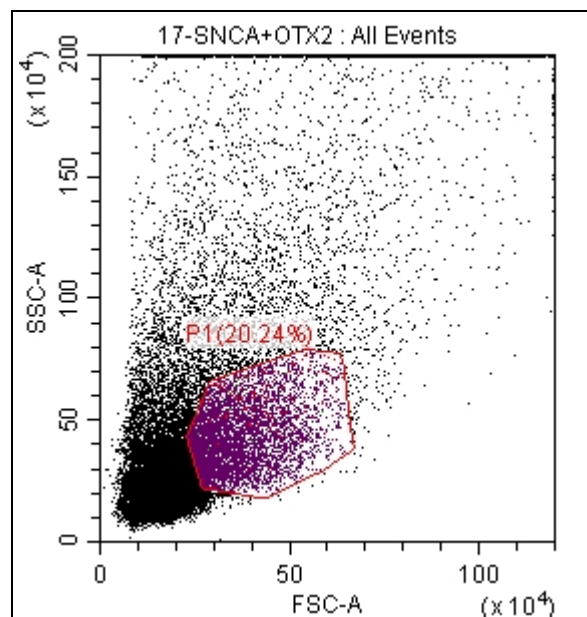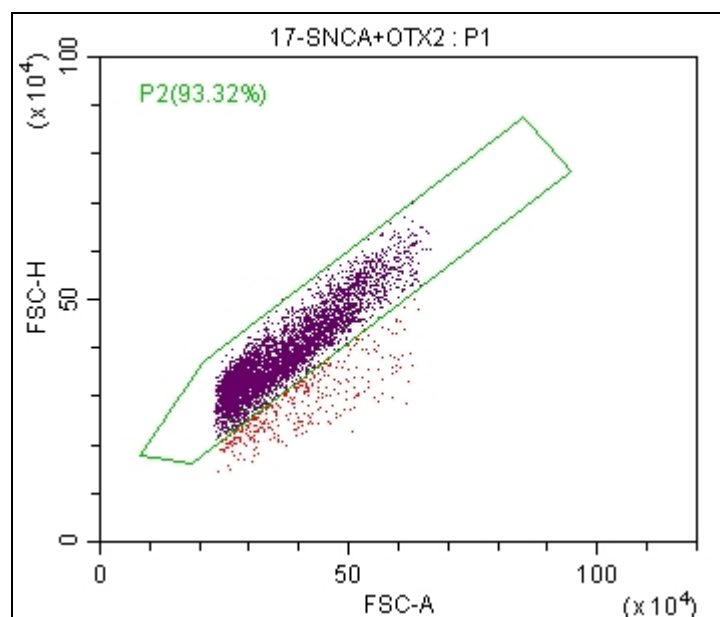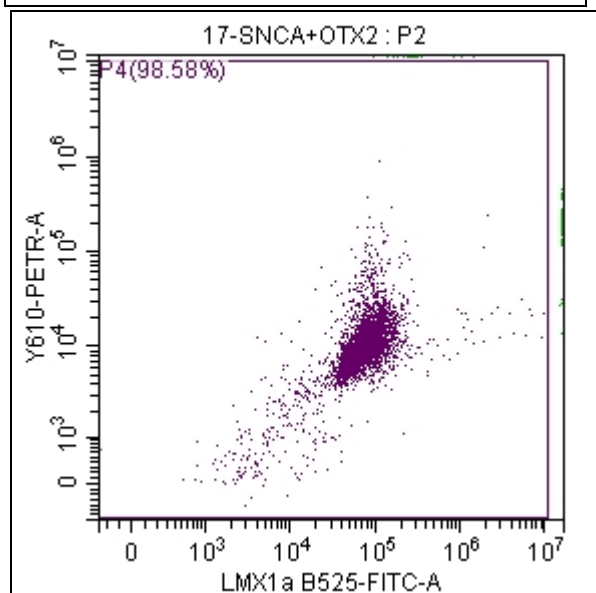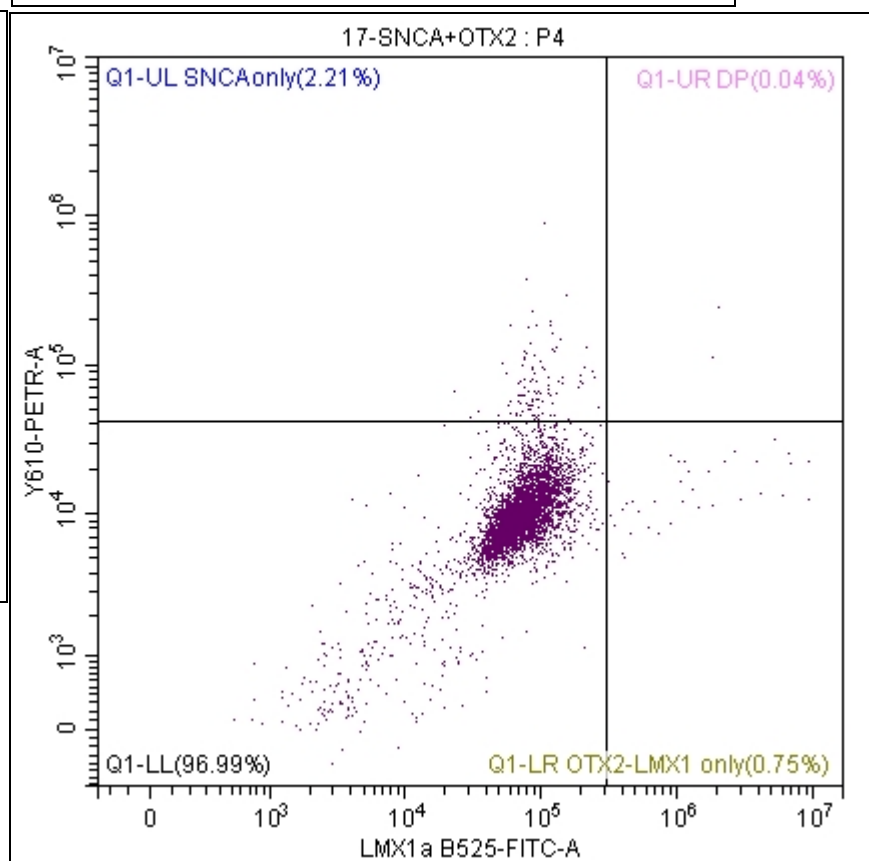

Tube Name: 17-SNCA+OTX2

Sample ID:

| Population           | Events | % Total | % Parent |
|----------------------|--------|---------|----------|
| ▼ All Events         | 25000  | 100.00% | 100.00%  |
| ▼ P1                 | 5059   | 20.24%  | 20.24%   |
| ▼ P2                 | 4721   | 18.88%  | 93.32%   |
| ▼ P4                 | 4654   | 18.62%  | 98.58%   |
| Q1-UR DP             | 2      | 0.01%   | 0.04%    |
| Q1-UL SNCA only      | 103    | 0.41%   | 2.21%    |
| Q1-LL                | 4514   | 18.06%  | 96.99%   |
| Q1-LR OTX2-LMX1 only | 35     | 0.14%   | 0.75%    |

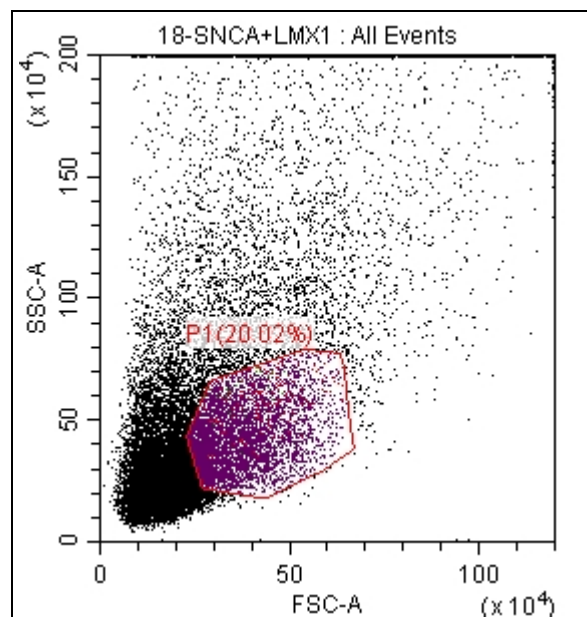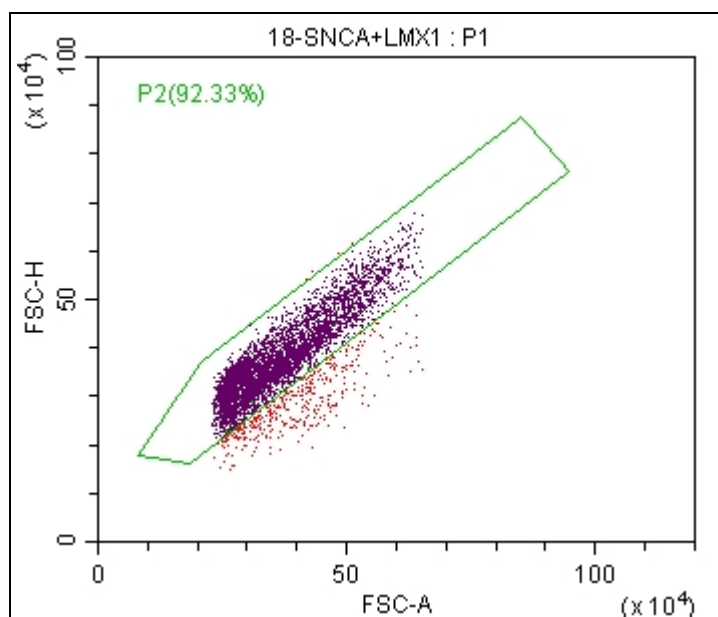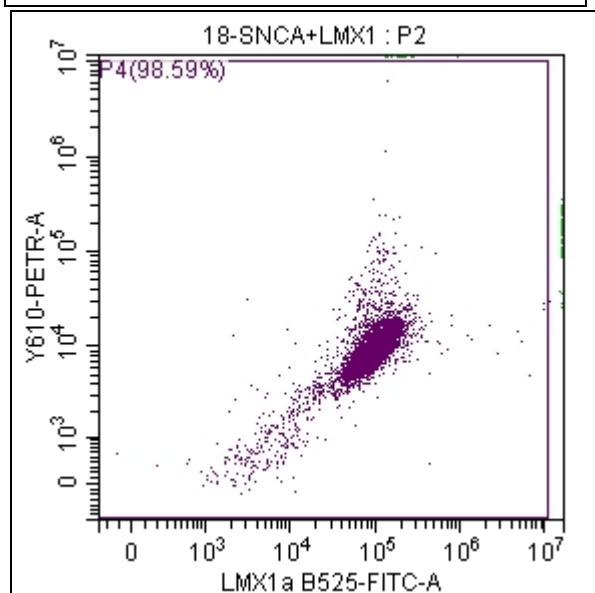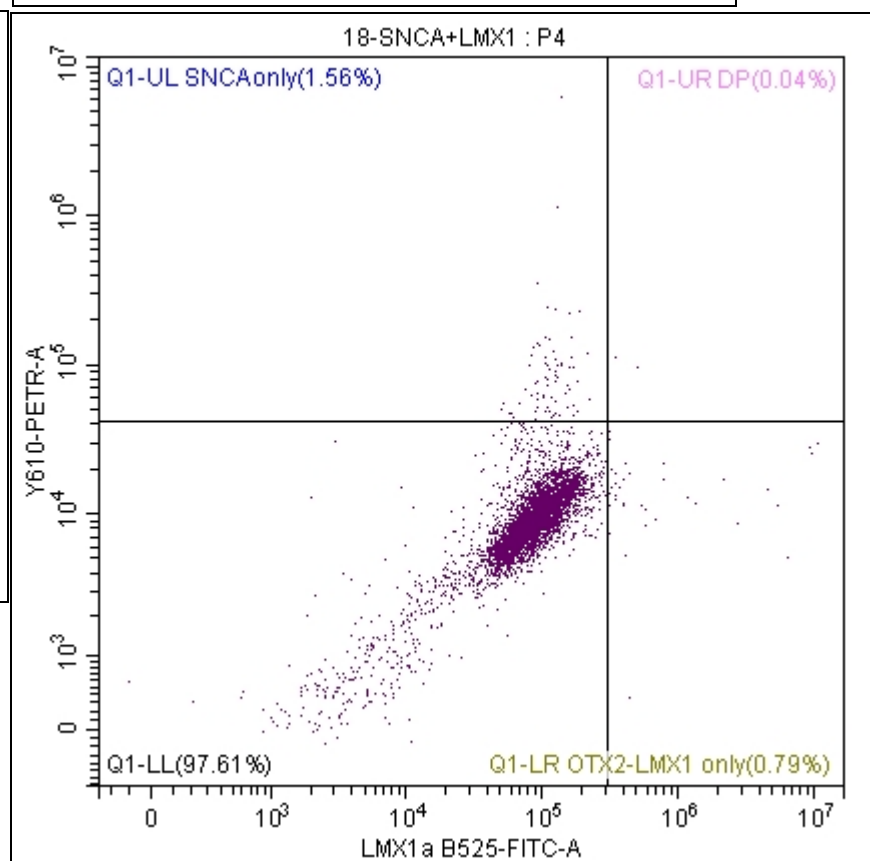

Tube Name: 18-SNCA+LMX1

Sample ID:

| Population             | Events | % Total | % Parent |
|------------------------|--------|---------|----------|
| ▼ ● All Events         | 25000  | 100.00% | 100.00%  |
| ▼ ● P1                 | 5006   | 20.02%  | 20.02%   |
| ▼ ● P2                 | 4622   | 18.49%  | 92.33%   |
| ▼ ● P4                 | 4557   | 18.23%  | 98.59%   |
| ● Q1-UR DP             | 2      | 0.01%   | 0.04%    |
| ● Q1-UL SNCA only      | 71     | 0.28%   | 1.56%    |
| ⊗ Q1-LL                | 4448   | 17.79%  | 97.61%   |
| ● Q1-LR OTX2-LMX1 only | 36     | 0.14%   | 0.79%    |
