# Supplementary material for: Identification of an early subset of cerebellar nuclei neurons in mice
Source: eLife journal article supplement (doi:10.7554/elife.93778), 2024-04-08
Supplement: fig3-data2 [file elife-93778-fig3-data2-v1.zip]

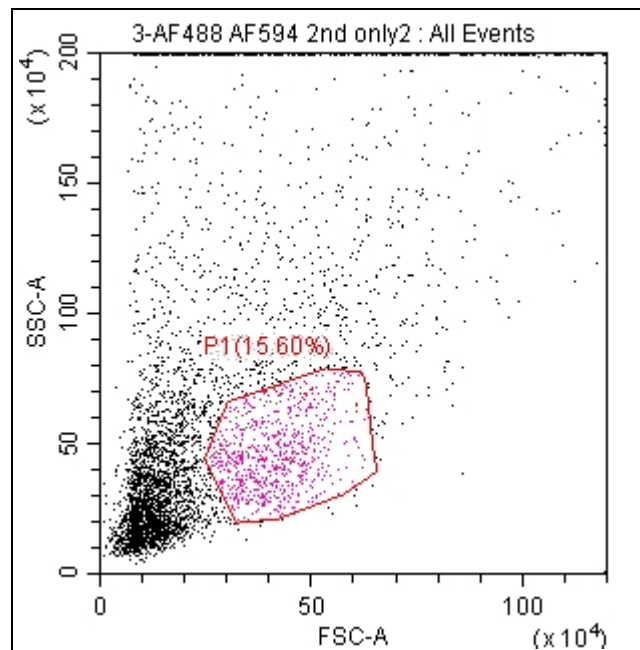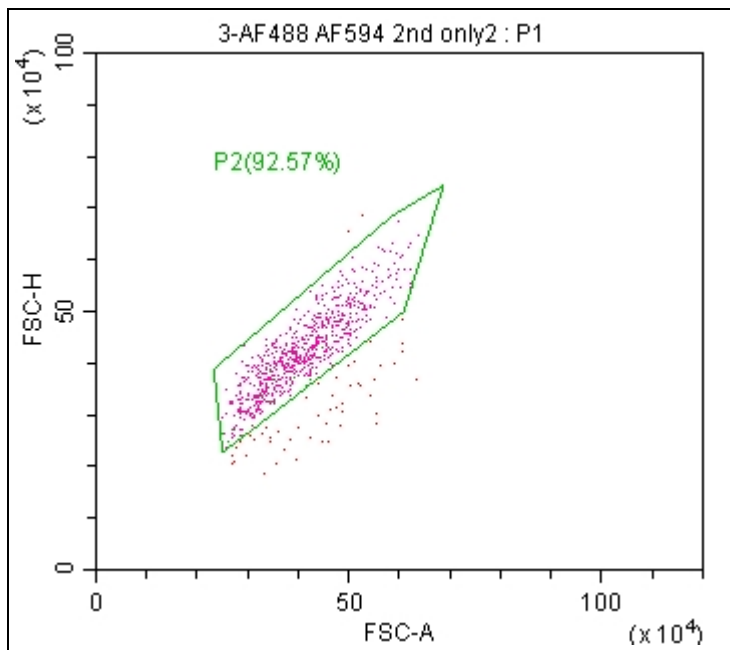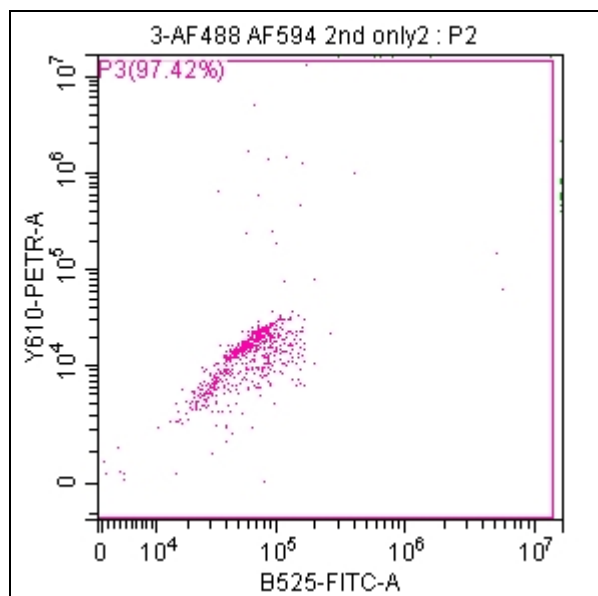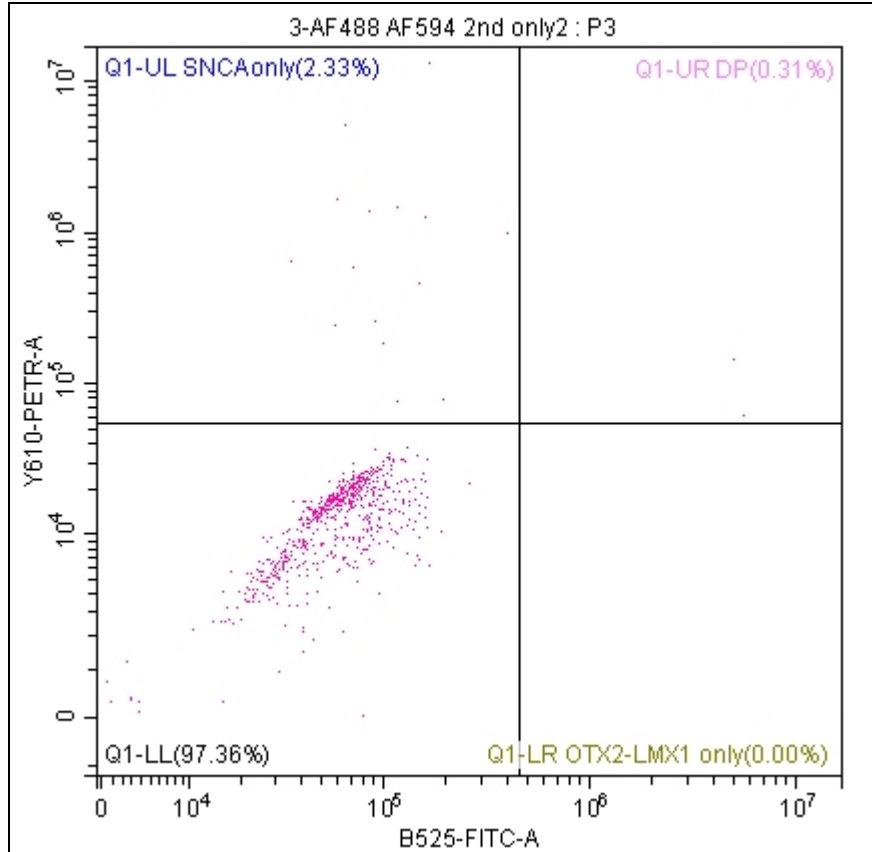

Tube Name: 3-AF488 AF594 2nd only2

Sample ID:

| Population             | Events | % Total | % Parent |
|------------------------|--------|---------|----------|
| ▼ ● All Events         | 4570   | 100.00% | 100.00%  |
| ▼ ● P1                 | 713    | 15.60%  | 15.60%   |
| ▼ ● P2                 | 660    | 14.44%  | 92.57%   |
| ▼ ● P3                 | 643    | 14.07%  | 97.42%   |
| ● Q1-UR DP             | 2      | 0.04%   | 0.31%    |
| ● Q1-UL SNCA only      | 15     | 0.33%   | 2.33%    |
| ⊗ Q1-LL                | 626    | 13.70%  | 97.36%   |
| ● Q1-LR OTX2-LMX1 only | 0      | 0.00%   | 0.00%    |

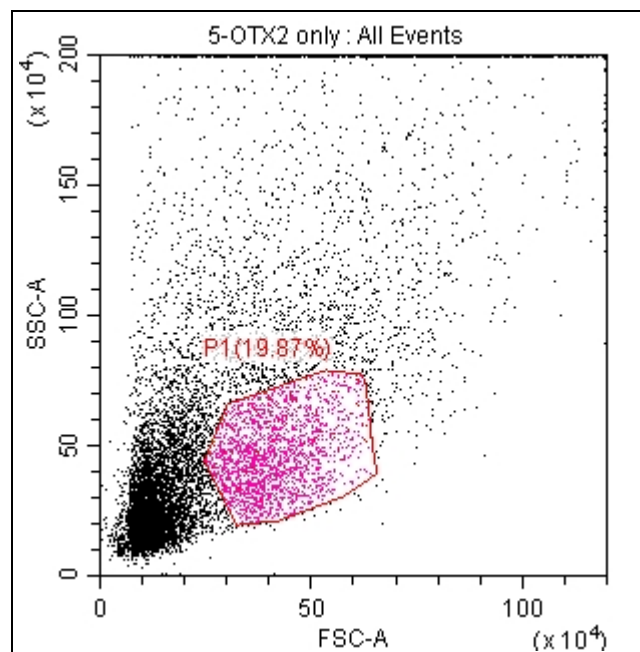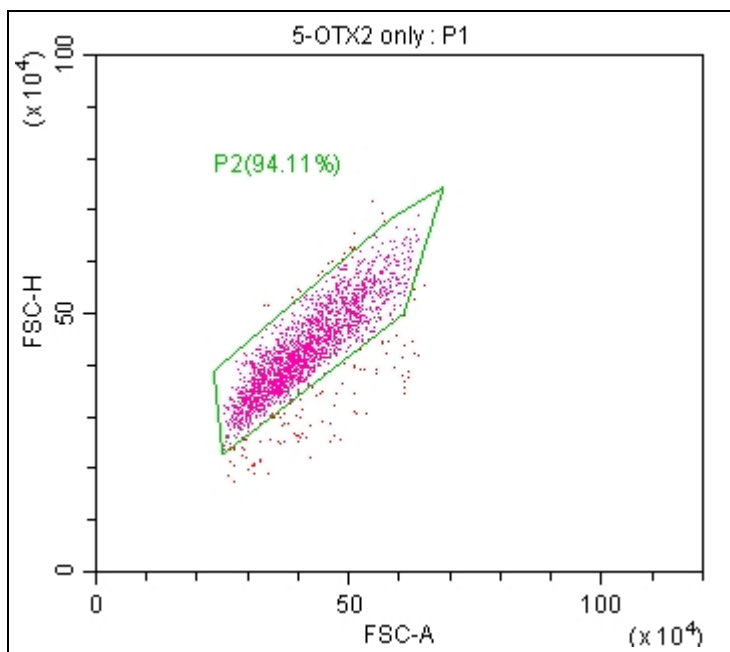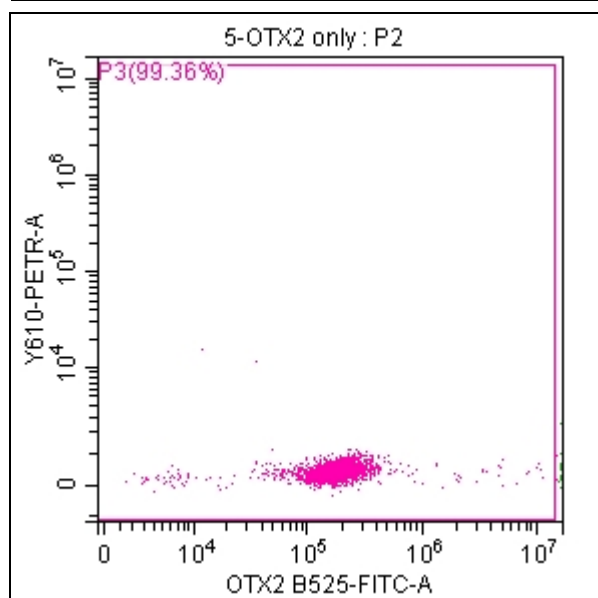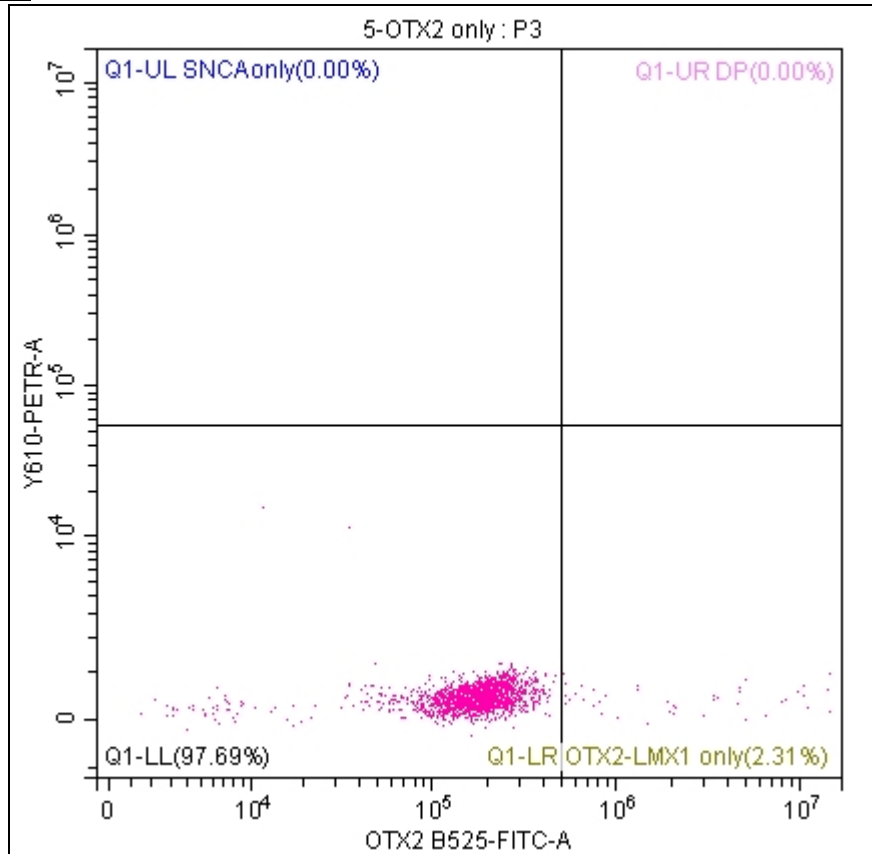

Tube Name: 5-OTX2 only

Sample ID:

| Population             | Events | % Total | % Parent |
|------------------------|--------|---------|----------|
| ▼ ● All Events         | 10000  | 100.00% | 100.00%  |
| ▼ ● P1                 | 1987   | 19.87%  | 19.87%   |
| ▼ ● P2                 | 1870   | 18.70%  | 94.11%   |
| ▼ ● P3                 | 1858   | 18.58%  | 99.36%   |
| ● Q1-UR DP             | 0      | 0.00%   | 0.00%    |
| ● Q1-UL SNCA only      | 0      | 0.00%   | 0.00%    |
| ⊗ Q1-LL                | 1815   | 18.15%  | 97.69%   |
| ● Q1-LR OTX2-LMX1 only | 43     | 0.43%   | 2.31%    |

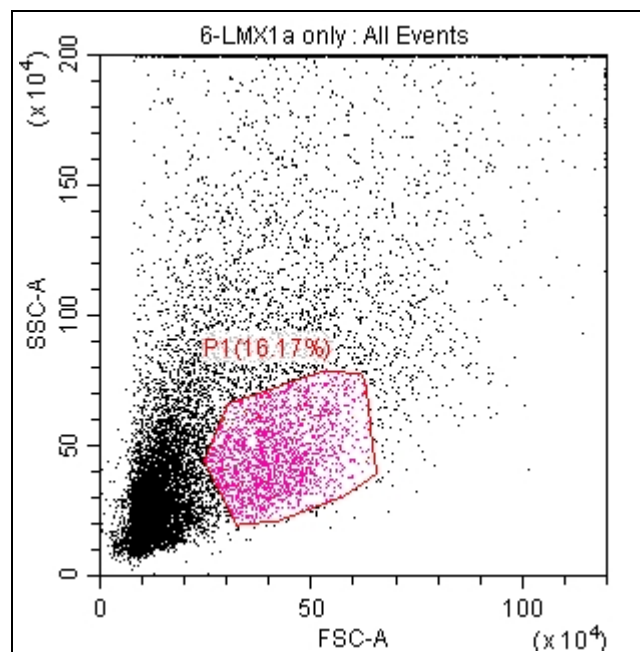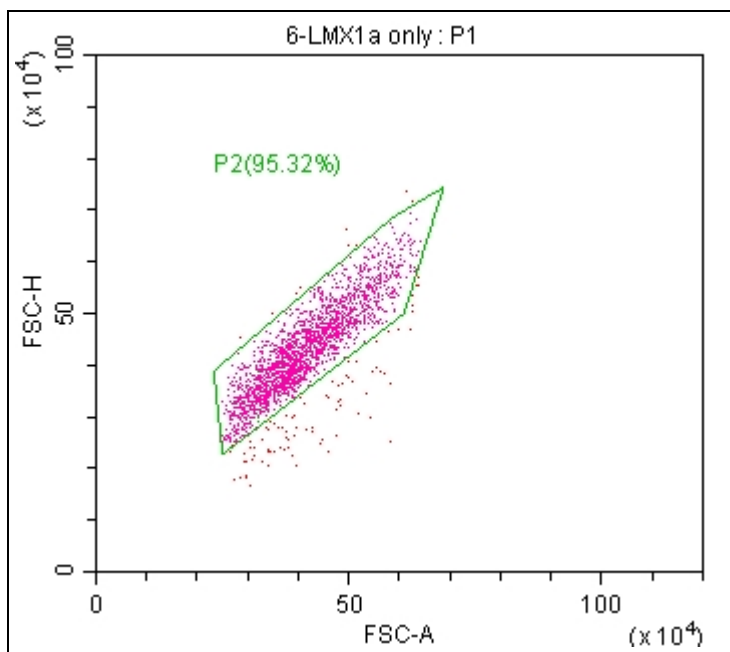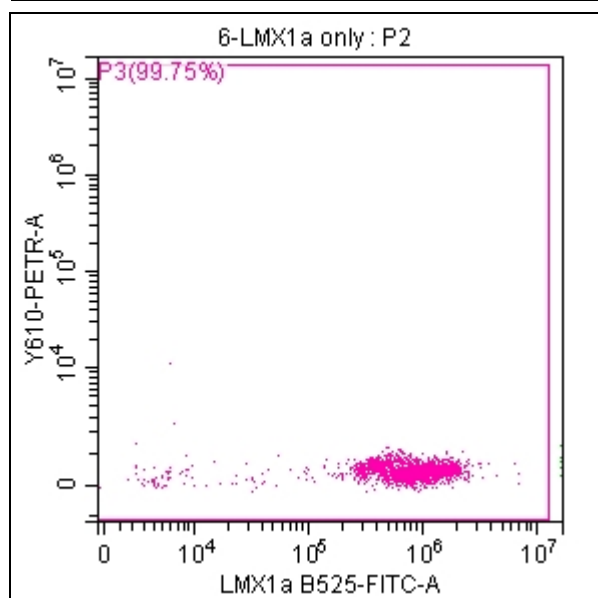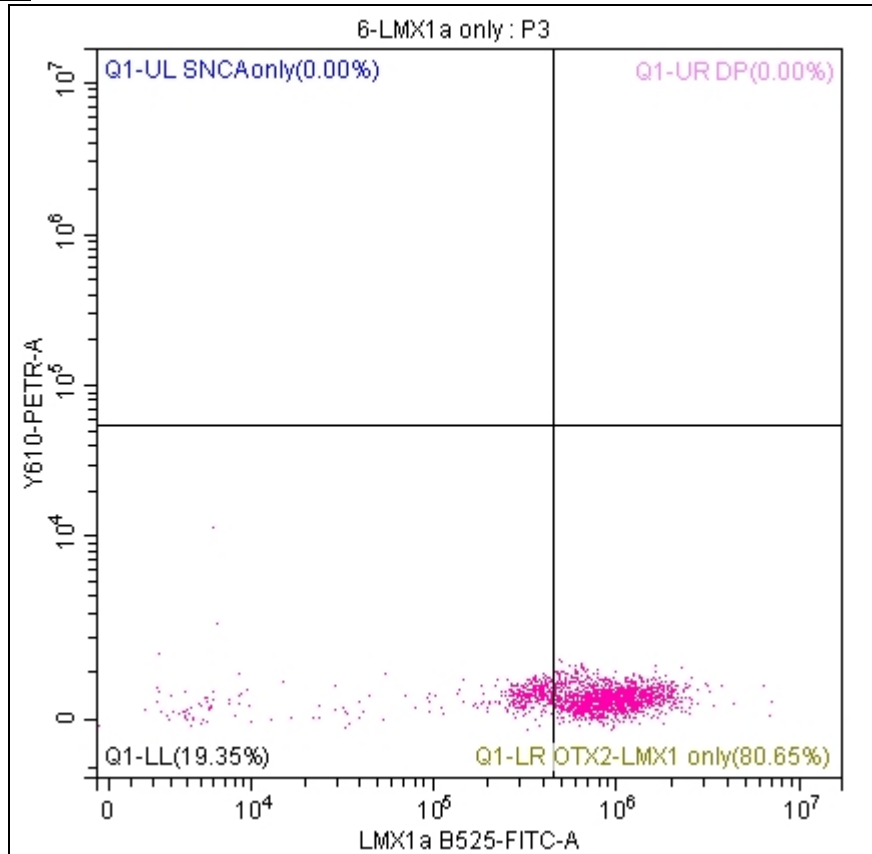

Tube Name: 6-LMX1a only

Sample ID:

| Population             | Events | % Total | % Parent |
|------------------------|--------|---------|----------|
| ▼ ● All Events         | 12809  | 100.00% | 100.00%  |
| ▼ ● P1                 | 2071   | 16.17%  | 16.17%   |
| ▼ ● P2                 | 1974   | 15.41%  | 95.32%   |
| ▼ ● P3                 | 1969   | 15.37%  | 99.75%   |
| ● Q1-UR DP             | 0      | 0.00%   | 0.00%    |
| ● Q1-UL SNCA only      | 0      | 0.00%   | 0.00%    |
| ⊗ Q1-LL                | 381    | 2.97%   | 19.35%   |
| ● Q1-LR OTX2-LMX1 only | 1588   | 12.40%  | 80.65%   |

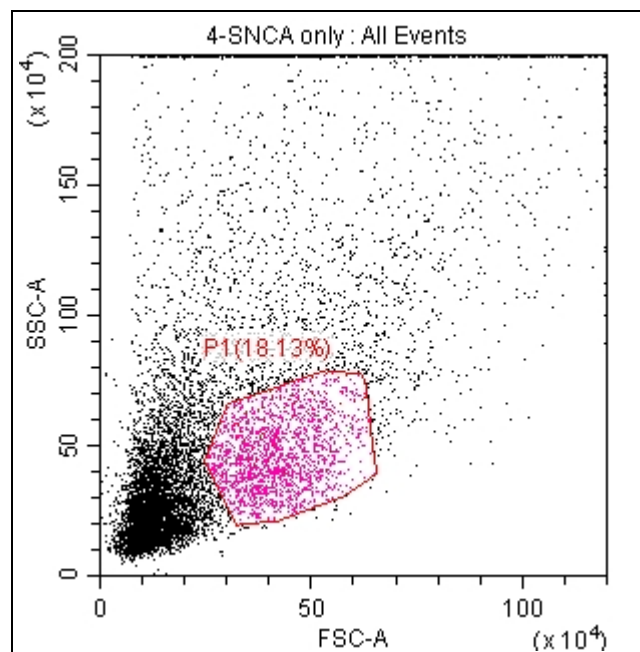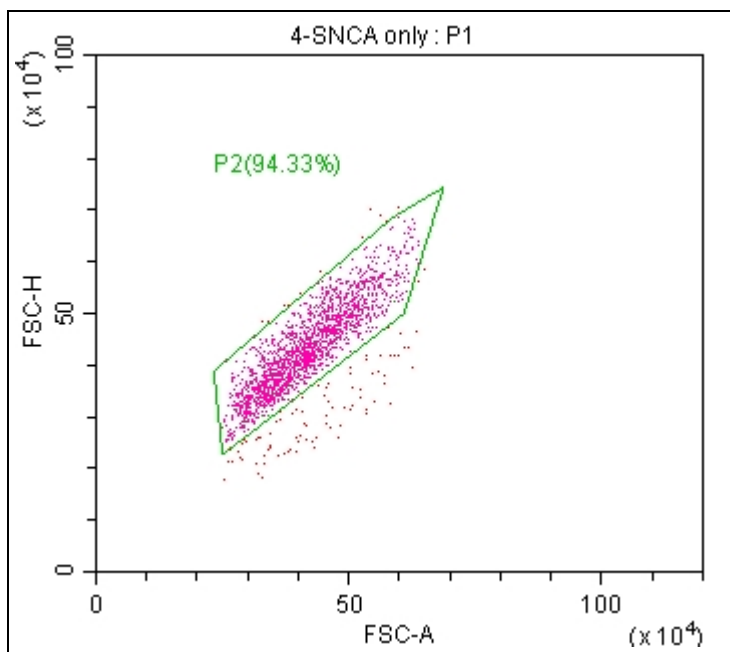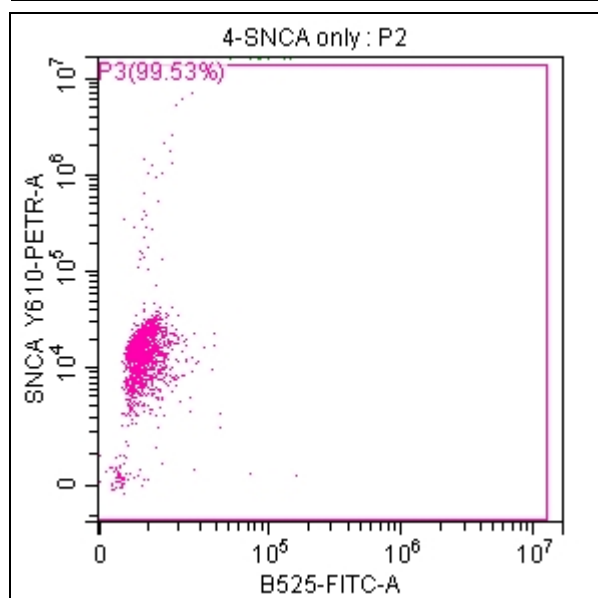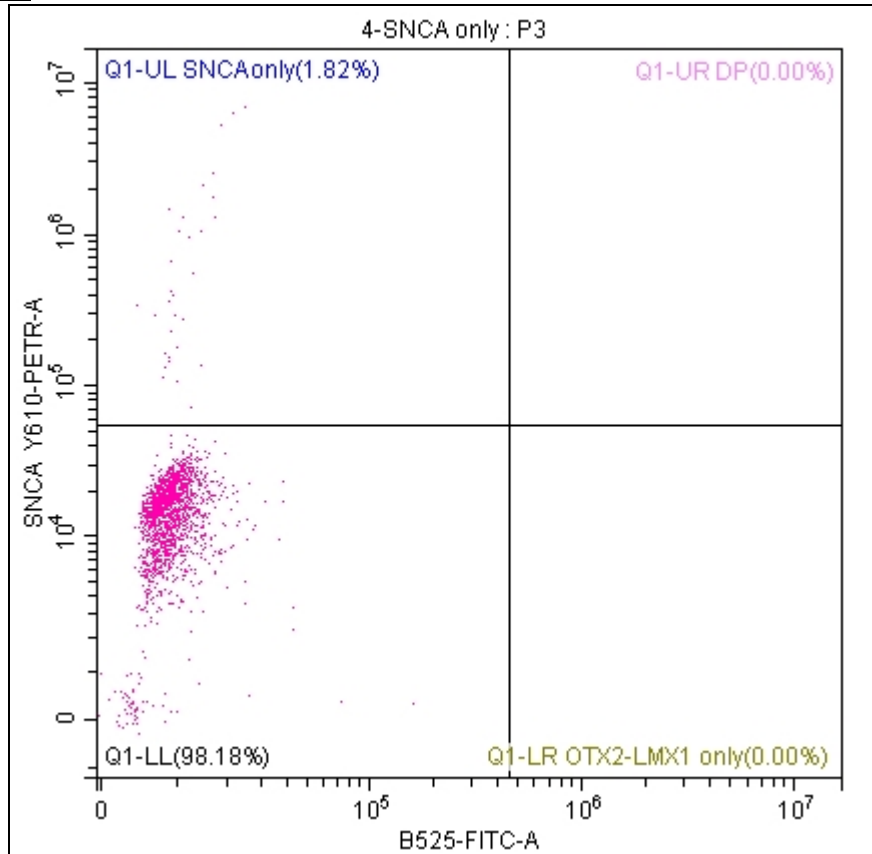

Tube Name: 4-SNCA only

Sample ID:

| Population             | Events | % Total | % Parent |
|------------------------|--------|---------|----------|
| ▼ ● All Events         | 10028  | 100.00% | 100.00%  |
| ▼ ● P1                 | 1818   | 18.13%  | 18.13%   |
| ▼ ● P2                 | 1715   | 17.10%  | 94.33%   |
| ▼ ● P3                 | 1707   | 17.02%  | 99.53%   |
| ● Q1-UR DP             | 0      | 0.00%   | 0.00%    |
| ● Q1-UL SNCA only      | 31     | 0.31%   | 1.82%    |
| ⊗ Q1-LL                | 1676   | 16.71%  | 98.18%   |
| ● Q1-LR OTX2-LMX1 only | 0      | 0.00%   | 0.00%    |

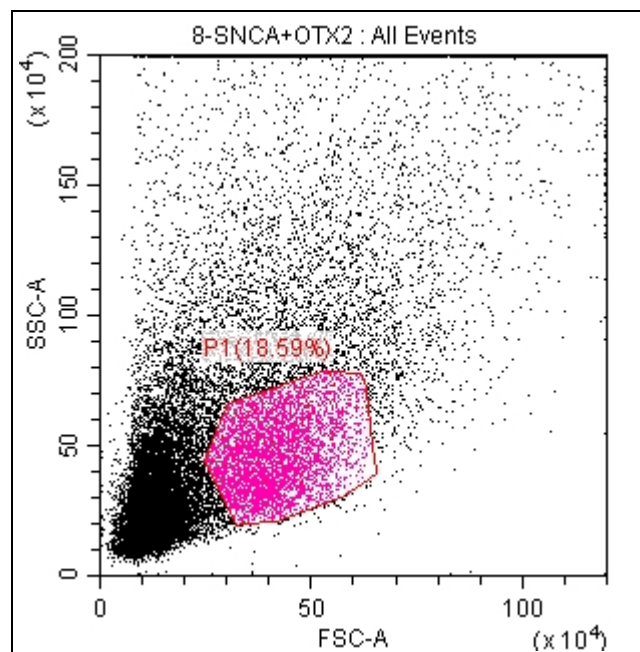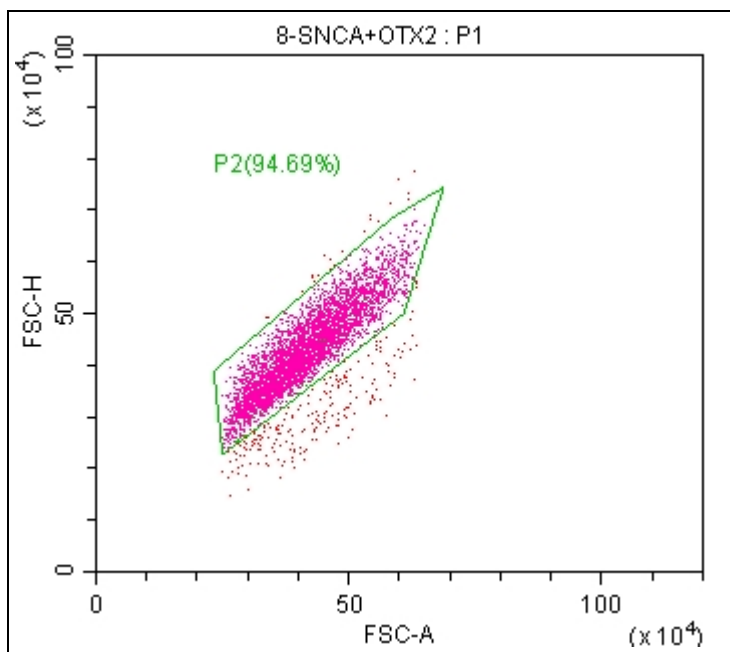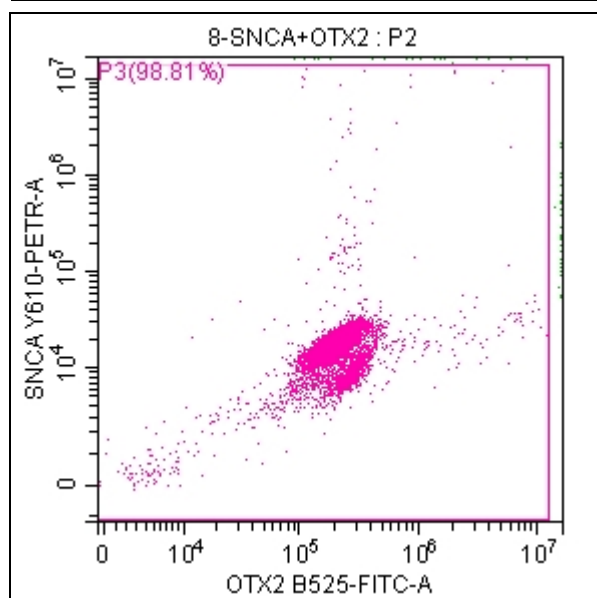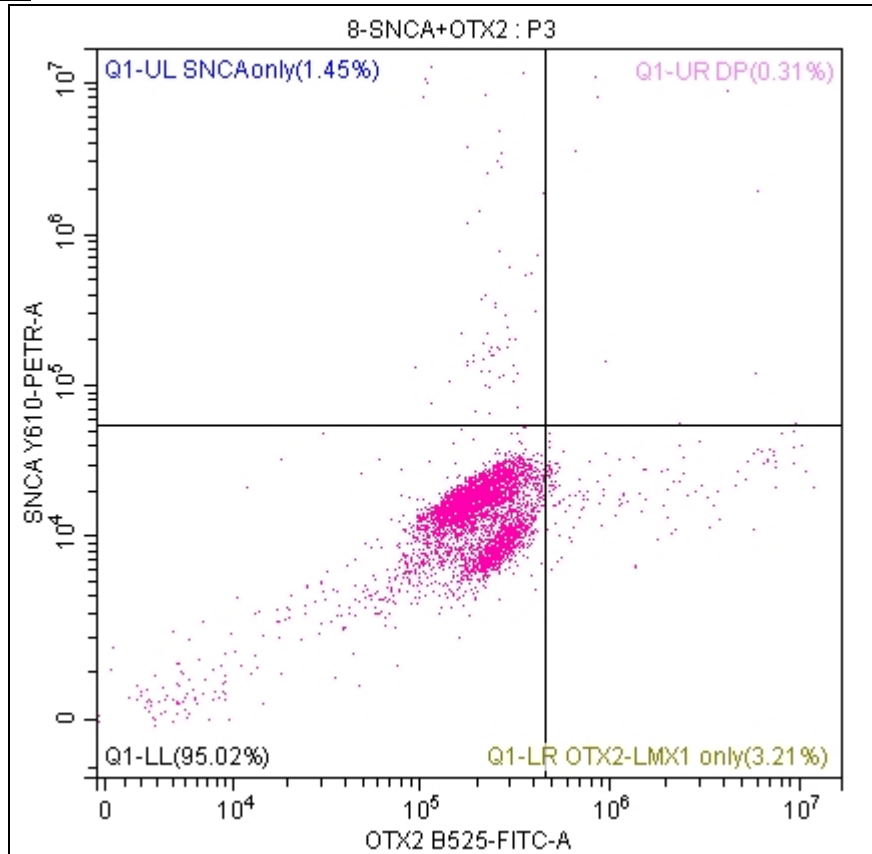

Tube Name: 8-SNCA+OTX2

Sample ID:

| Population           | Events | % Total | % Parent |
|----------------------|--------|---------|----------|
| ▼ All Events         | 23788  | 100.00% | 100.00%  |
| ▼ P1                 | 4422   | 18.59%  | 18.59%   |
| ▼ P2                 | 4187   | 17.60%  | 94.69%   |
| ▼ P3                 | 4137   | 17.39%  | 98.81%   |
| Q1-UR DP             | 13     | 0.05%   | 0.31%    |
| Q1-UL SNCA only      | 60     | 0.25%   | 1.45%    |
| Q1-LL                | 3931   | 16.53%  | 95.02%   |
| Q1-LR OTX2-LMX1 only | 133    | 0.56%   | 3.21%    |

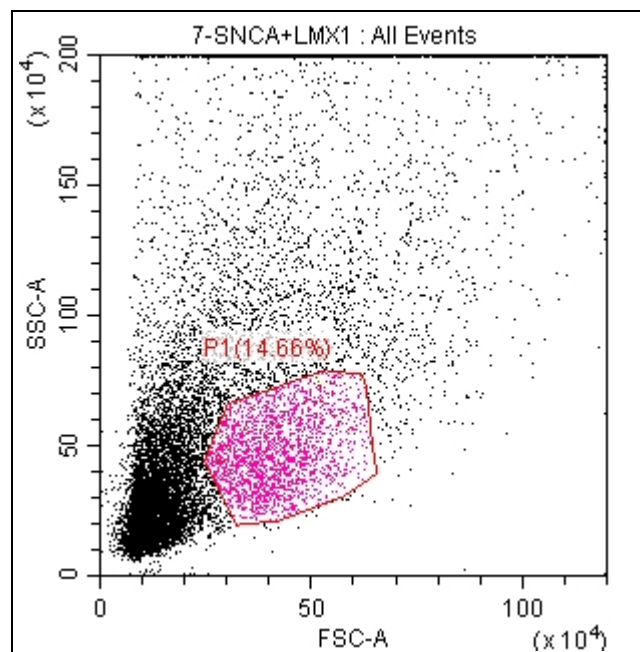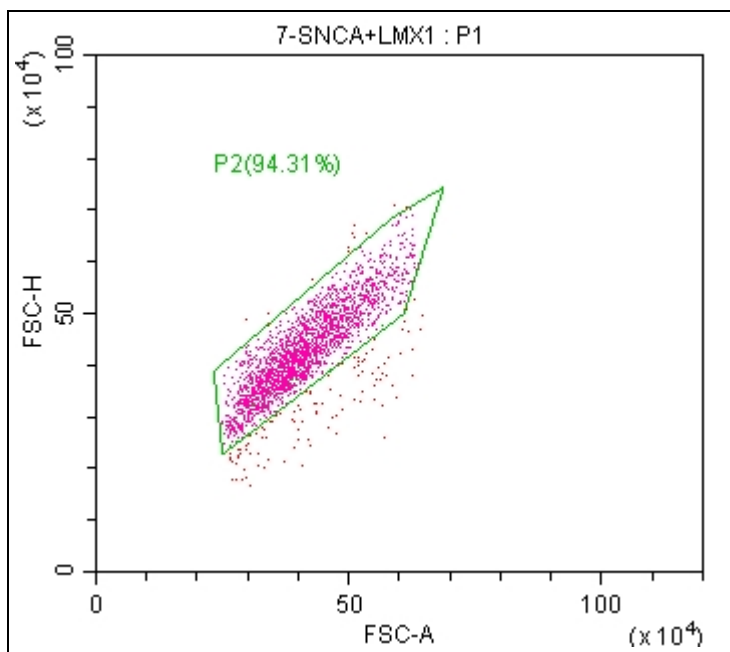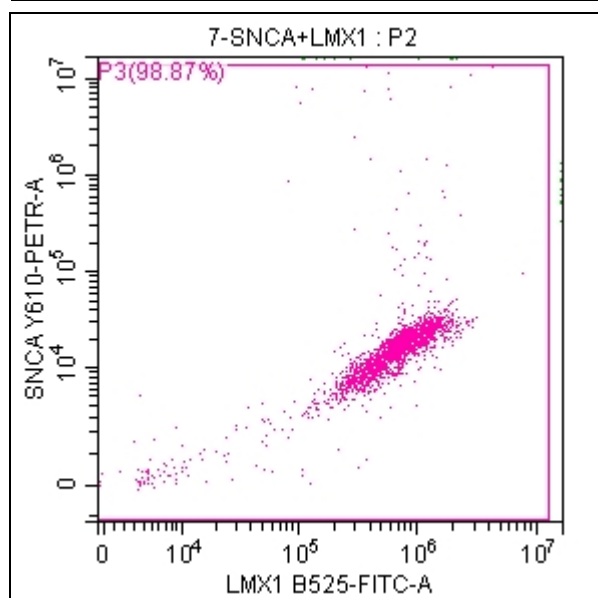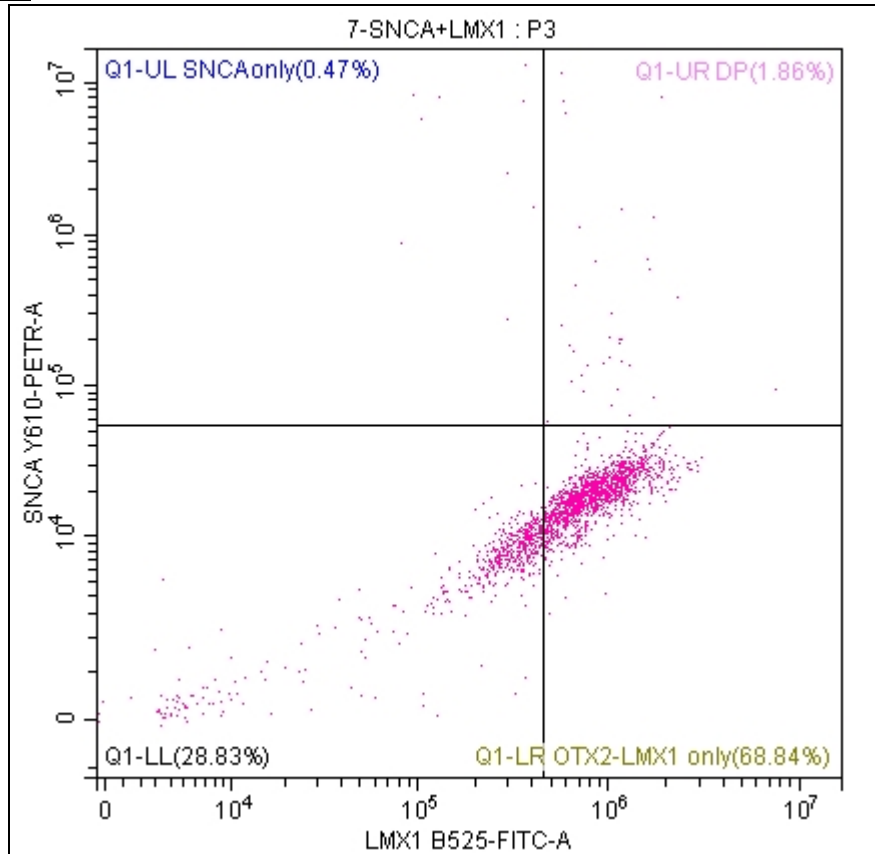

Tube Name: 7-SNCA+LMX1

Sample ID:

| Population           | Events | % Total | % Parent |
|----------------------|--------|---------|----------|
| ▼ All Events         | 14135  | 100.00% | 100.00%  |
| ▼ P1                 | 2072   | 14.66%  | 14.66%   |
| ▼ P2                 | 1954   | 13.82%  | 94.31%   |
| ▼ P3                 | 1932   | 13.67%  | 98.87%   |
| Q1-UR DP             | 36     | 0.25%   | 1.86%    |
| Q1-UL SNCA only      | 9      | 0.06%   | 0.47%    |
| Q1-LL                | 557    | 3.94%   | 28.83%   |
| Q1-LR OTX2-LMX1 only | 1330   | 9.41%   | 68.84%   |
