# Supplementary material for: Identification of an early subset of cerebellar nuclei neurons in mice
Source: eLife journal article supplement (doi:10.7554/elife.93778), 2024-04-08
Supplement: fig3-data2 [file elife-93778-fig3-data2-v1.zip]

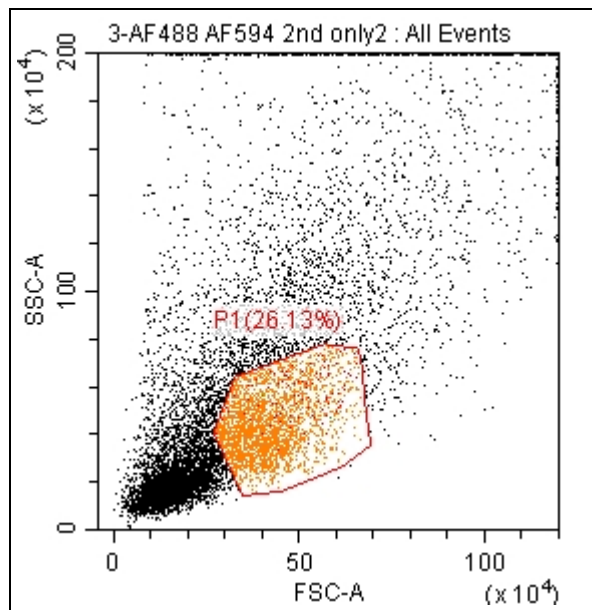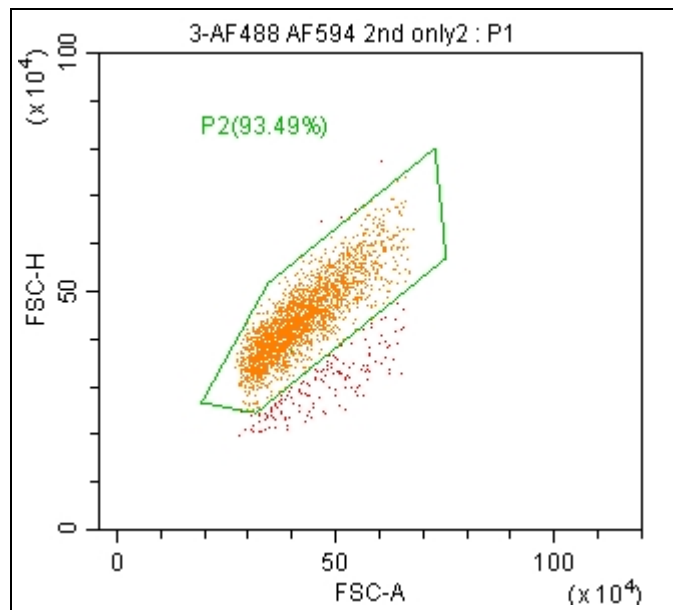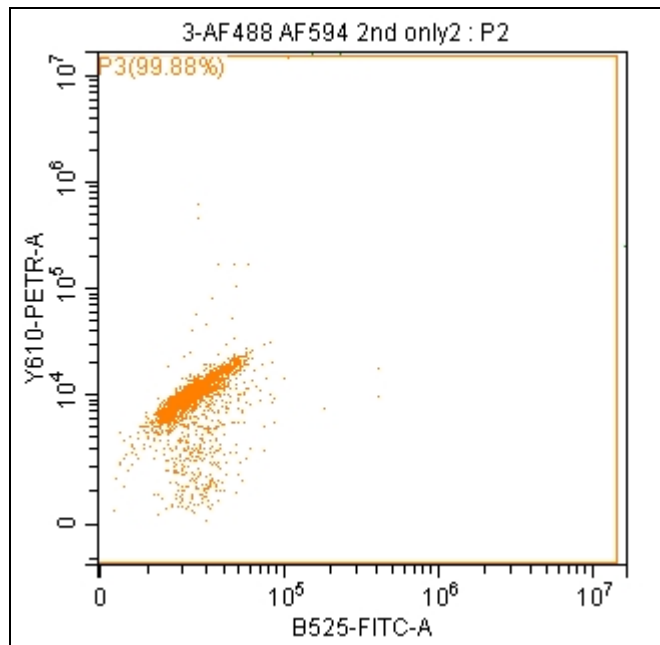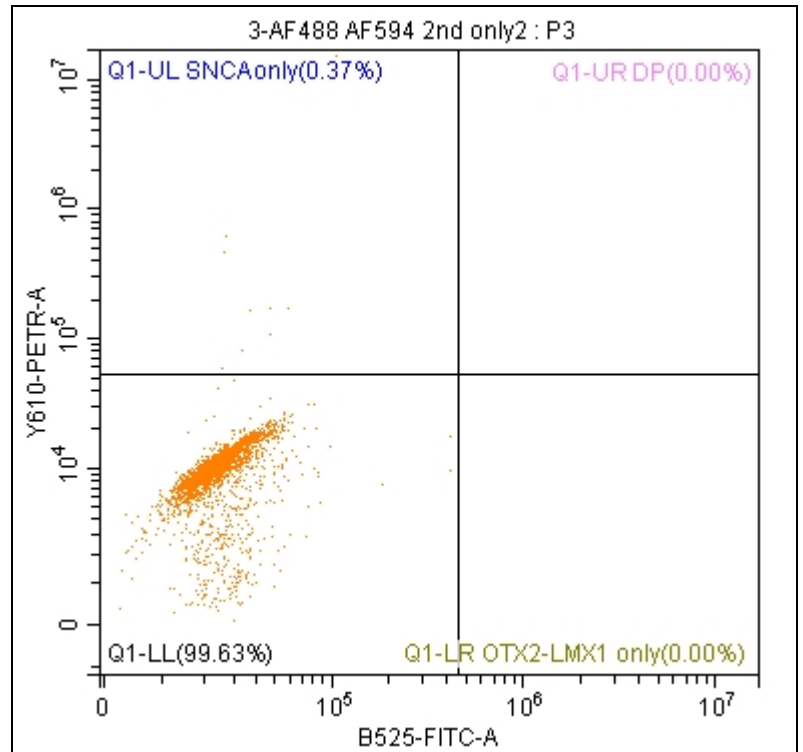

Tube Name: 3-AF488 AF594 2nd only2

Sample ID:

| Population           | Events | % Total | % Parent |
|----------------------|--------|---------|----------|
| ▼ All Events         | 10000  | 100.00% | 100.00%  |
| ▼ P1                 | 2613   | 26.13%  | 26.13%   |
| ▼ P2                 | 2443   | 24.43%  | 93.49%   |
| ▼ P3                 | 2440   | 24.40%  | 99.88%   |
| Q1-UR DP             | 0      | 0.00%   | 0.00%    |
| Q1-UL SNCA only      | 9      | 0.09%   | 0.37%    |
| Q1-LL                | 2431   | 24.31%  | 99.63%   |
| Q1-LR OTX2-LMX1 only | 0      | 0.00%   | 0.00%    |

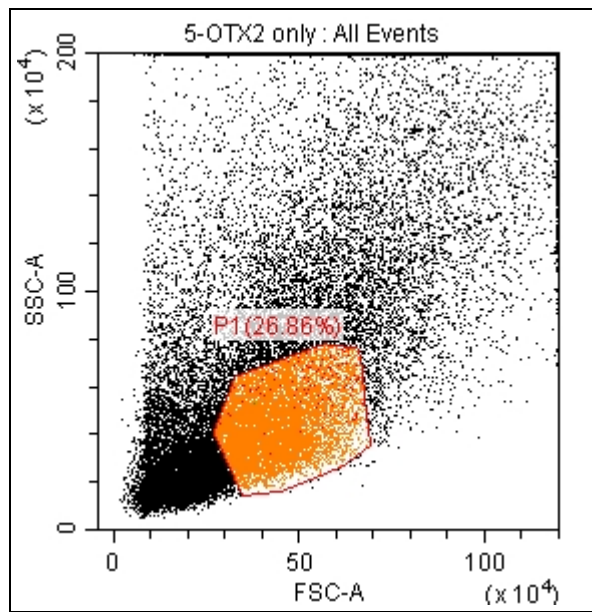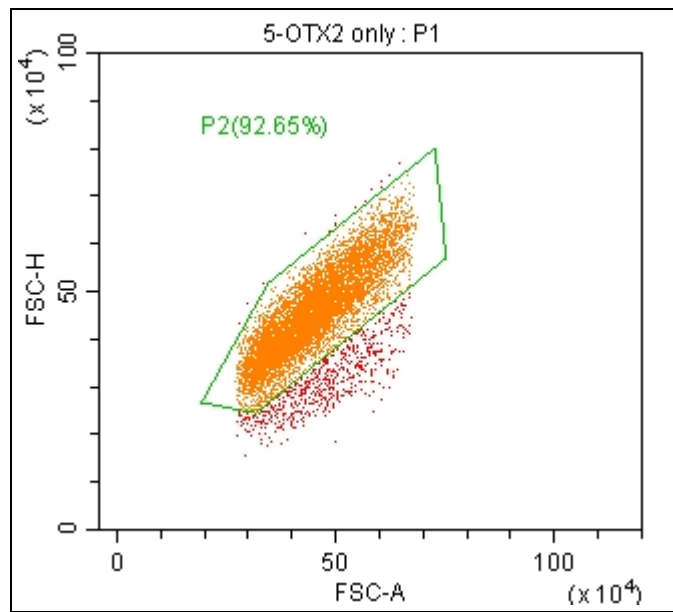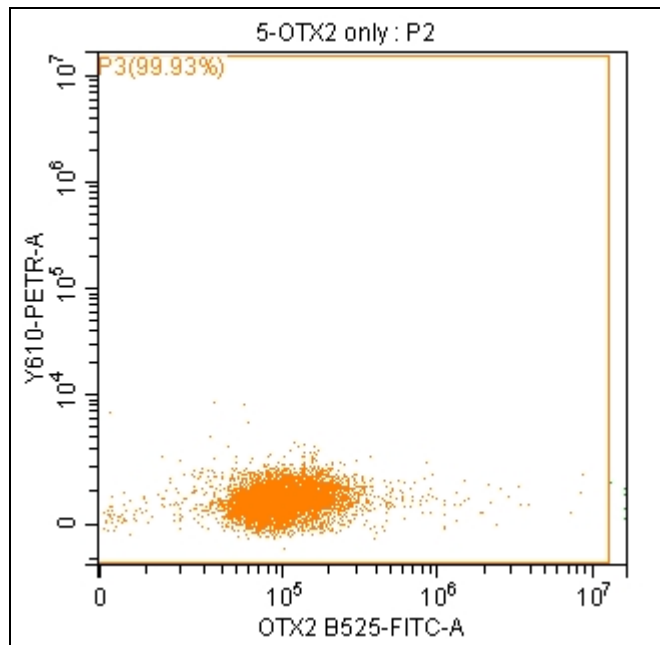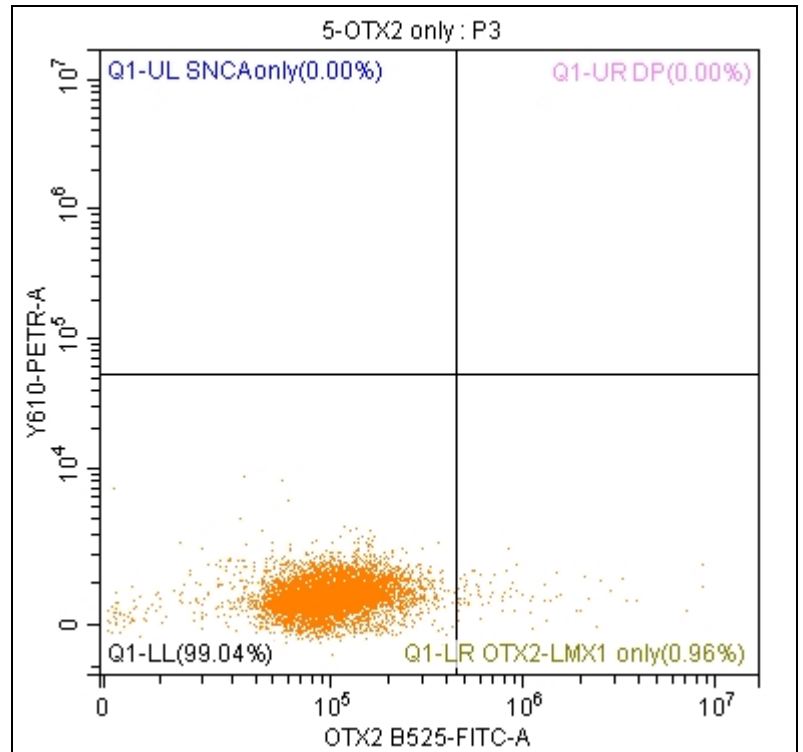

Tube Name: 5-OTX2 only

Sample ID:

| Population             | Events | % Total | % Parent |
|------------------------|--------|---------|----------|
| ▼ ● All Events         | 30000  | 100.00% | 100.00%  |
| ▼ ● P1                 | 8059   | 26.86%  | 26.86%   |
| ▼ ● P2                 | 7467   | 24.89%  | 92.65%   |
| ▼ ● P3                 | 7462   | 24.87%  | 99.93%   |
| ● Q1-UR DP             | 0      | 0.00%   | 0.00%    |
| ● Q1-UL SNCA only      | 0      | 0.00%   | 0.00%    |
| ⊗ Q1-LL                | 7390   | 24.63%  | 99.04%   |
| ● Q1-LR OTX2-LMX1 only | 72     | 0.24%   | 0.96%    |

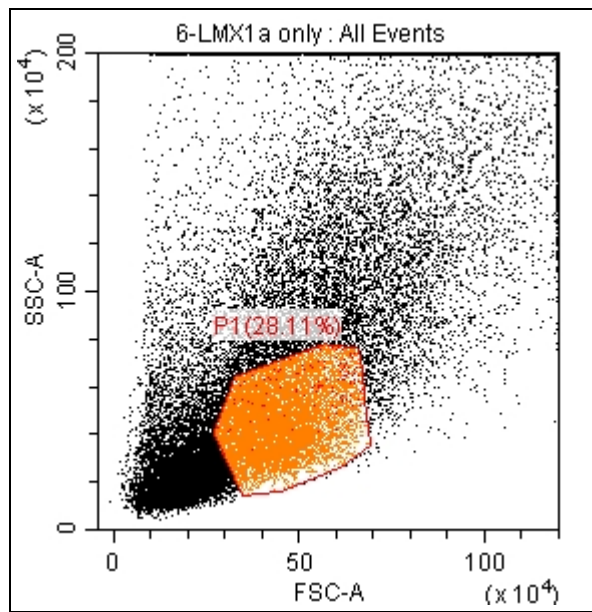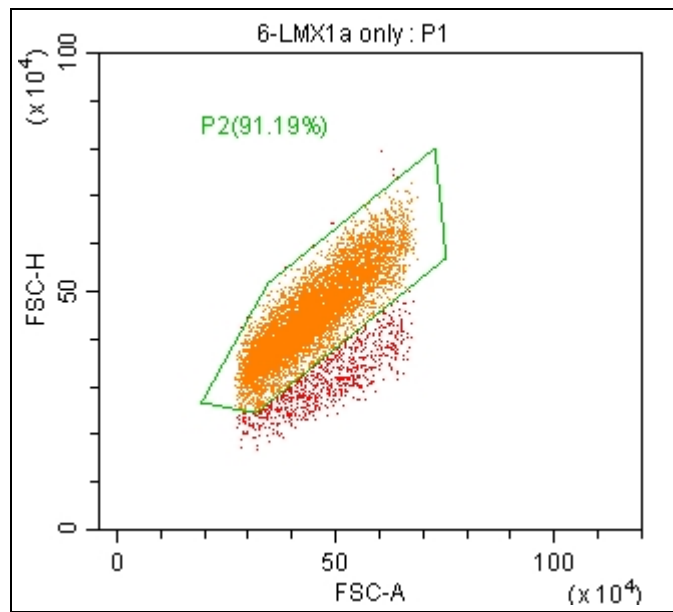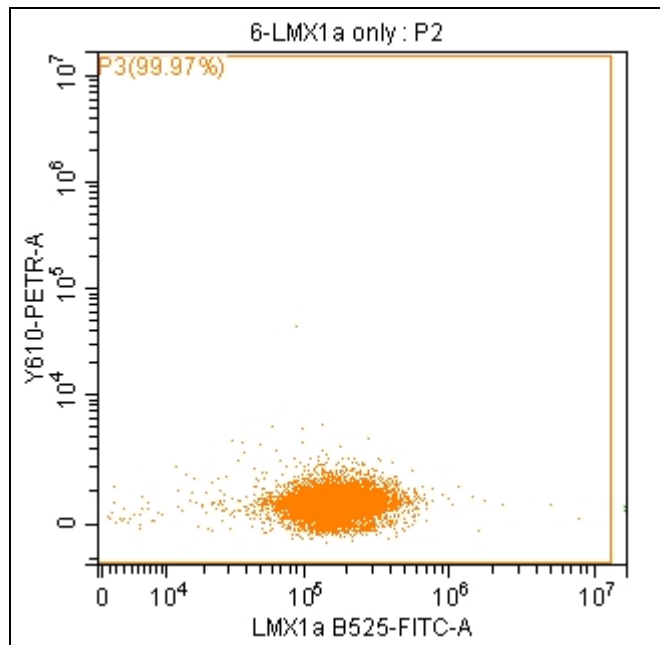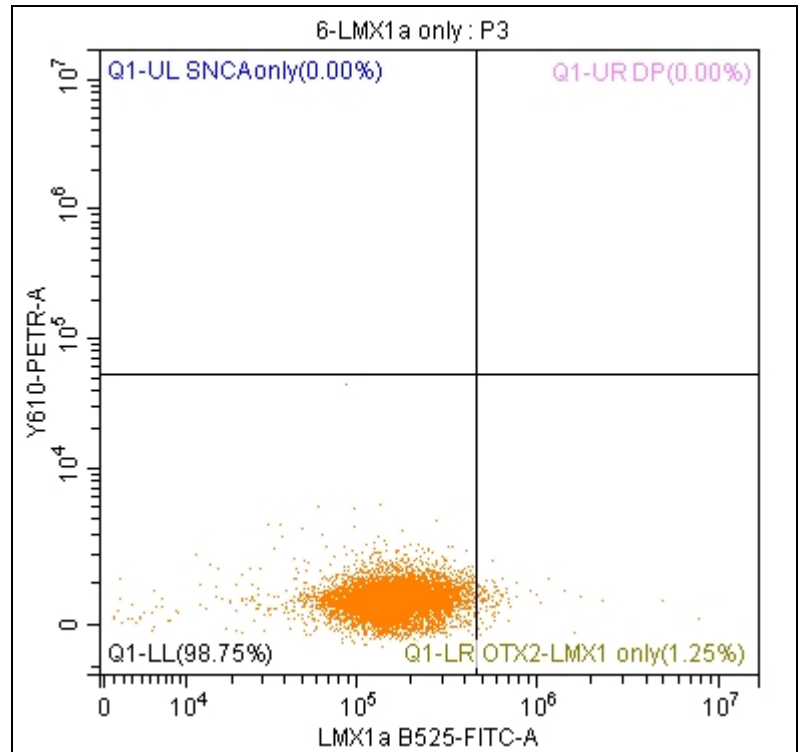

Tube Name: 6-LMX1a only

Sample ID:

| Population             | Events | % Total | % Parent |
|------------------------|--------|---------|----------|
| ▼ ● All Events         | 30000  | 100.00% | 100.00%  |
| ▼ ● P1                 | 8433   | 28.11%  | 28.11%   |
| ▼ ● P2                 | 7690   | 25.63%  | 91.19%   |
| ▼ ● P3                 | 7688   | 25.63%  | 99.97%   |
| ● Q1-UR DP             | 0      | 0.00%   | 0.00%    |
| ● Q1-UL SNCA only      | 0      | 0.00%   | 0.00%    |
| ⊗ Q1-LL                | 7592   | 25.31%  | 98.75%   |
| ● Q1-LR OTX2-LMX1 only | 96     | 0.32%   | 1.25%    |

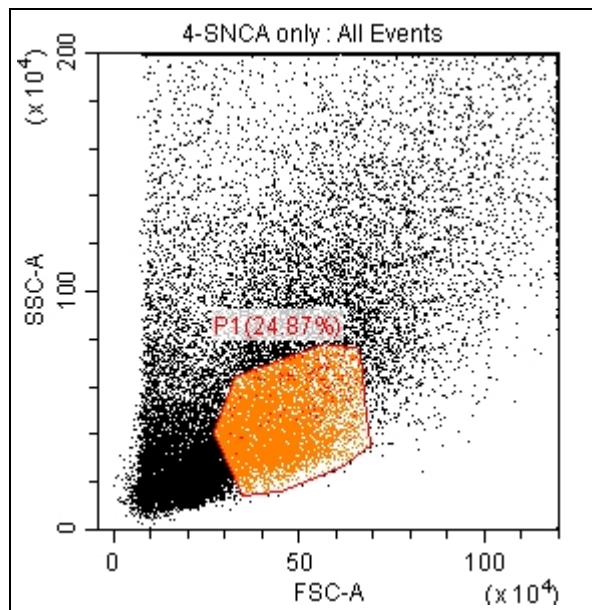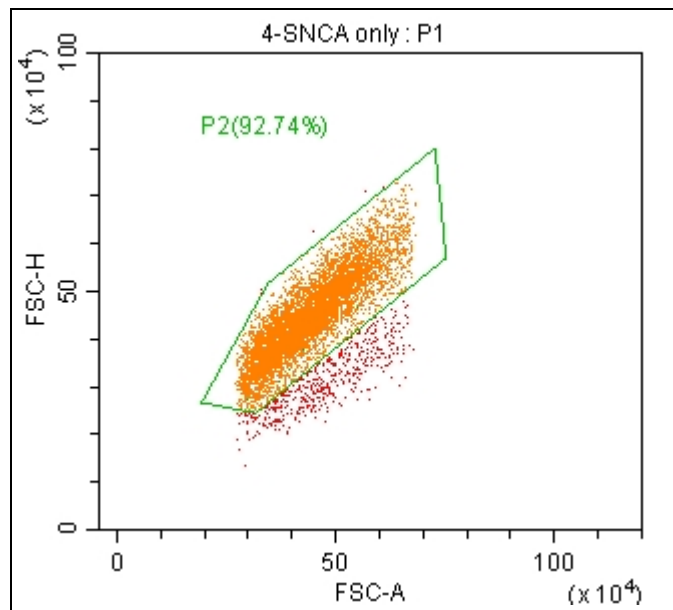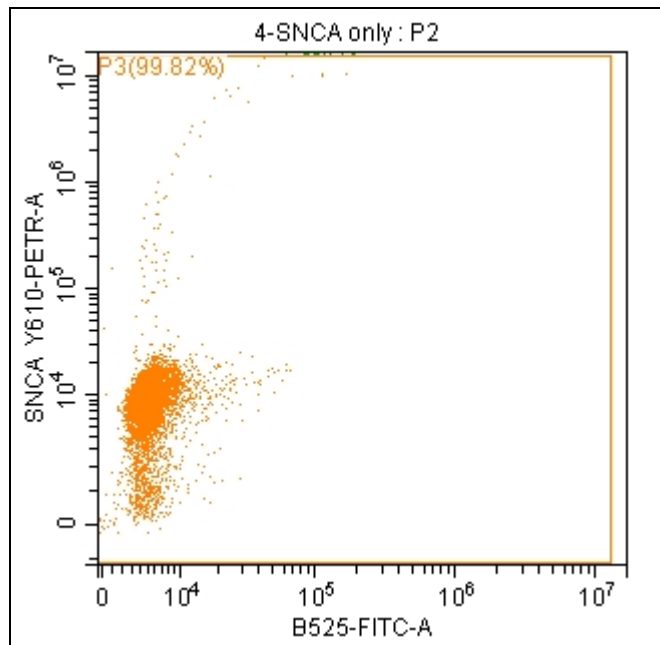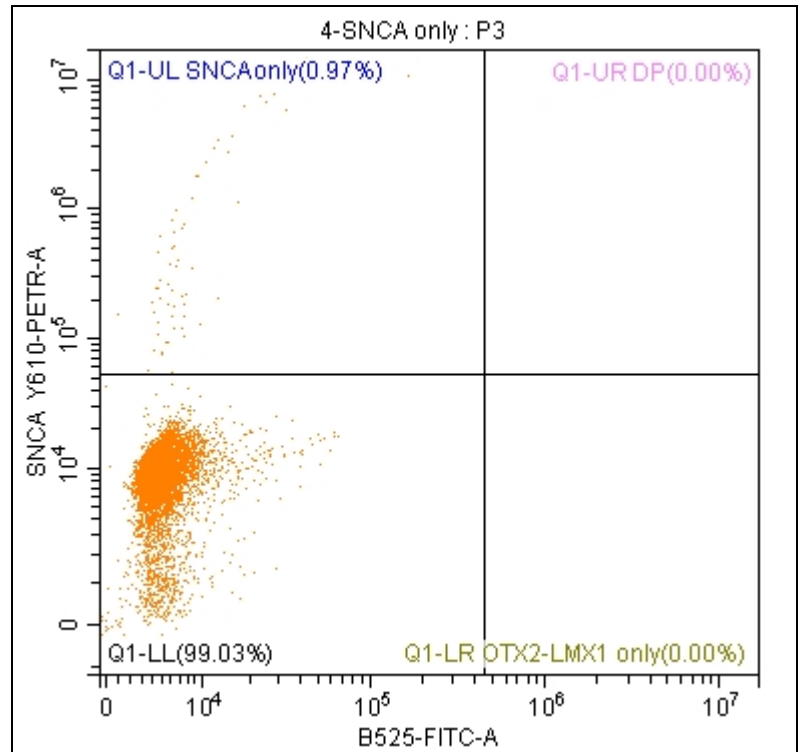

Tube Name: 4-SNCA only

Sample ID:

| Population             | Events | % Total | % Parent |
|------------------------|--------|---------|----------|
| ▼ ● All Events         | 28140  | 100.00% | 100.00%  |
| ▼ ● P1                 | 6998   | 24.87%  | 24.87%   |
| ▼ ● P2                 | 6490   | 23.06%  | 92.74%   |
| ▼ ● P3                 | 6478   | 23.02%  | 99.82%   |
| ● Q1-UR DP             | 0      | 0.00%   | 0.00%    |
| ● Q1-UL SNCA only      | 63     | 0.22%   | 0.97%    |
| ⊗ Q1-LL                | 6415   | 22.80%  | 99.03%   |
| ● Q1-LR OTX2-LMX1 only | 0      | 0.00%   | 0.00%    |

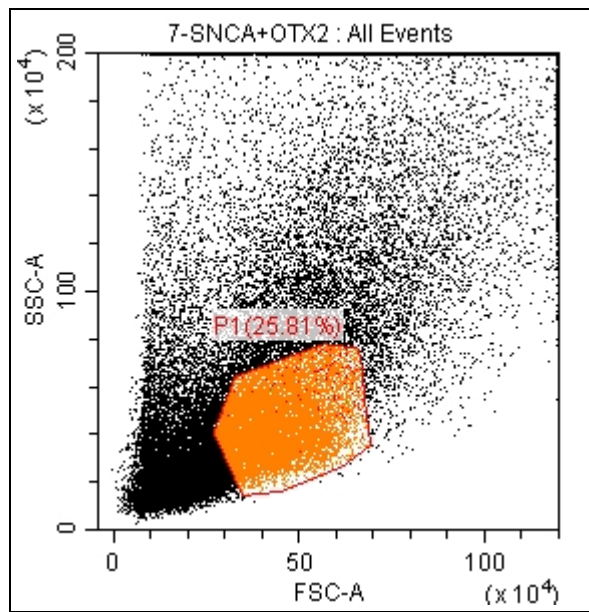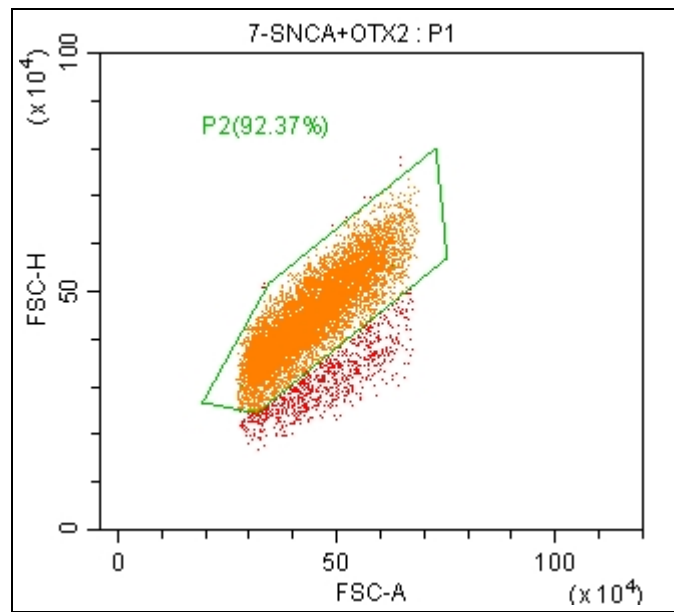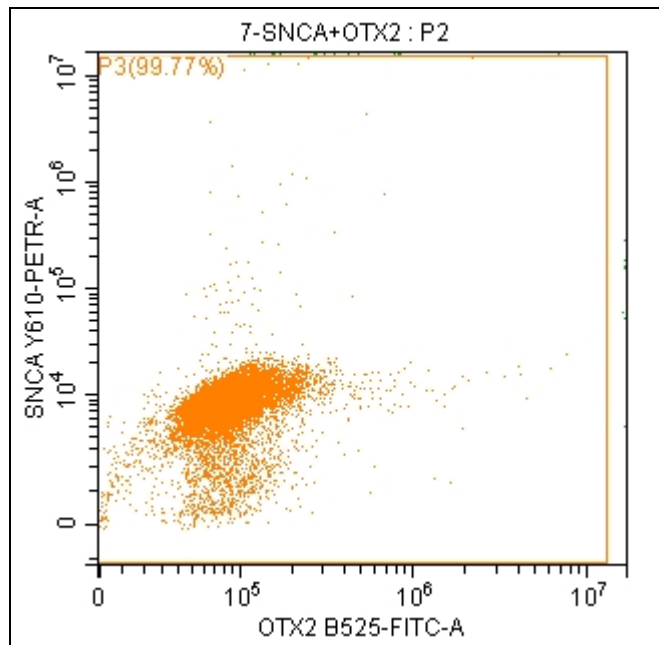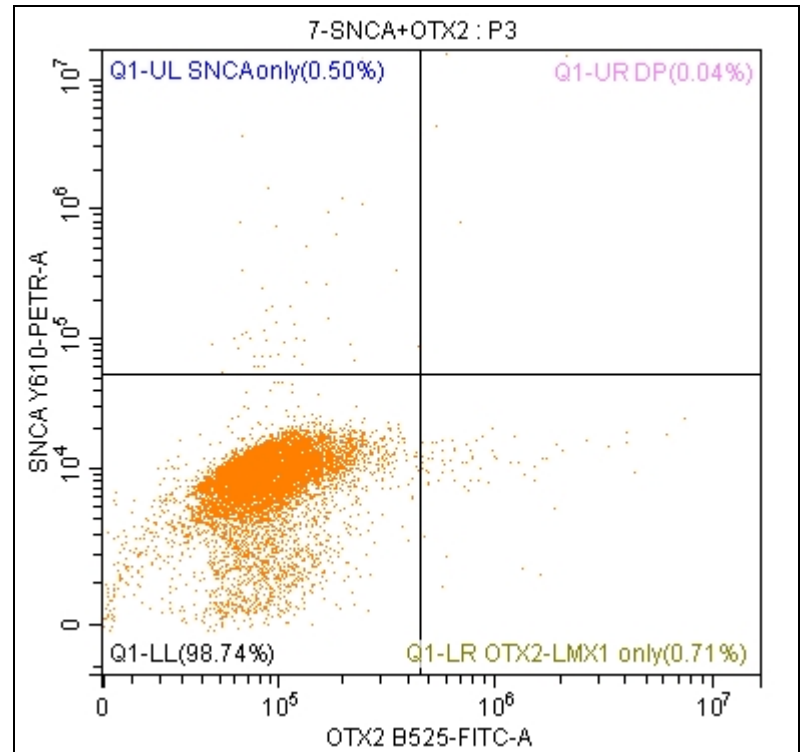

Tube Name: 7-SNCA+OTX2

Sample ID:

| Population           | Events | % Total | % Parent |
|----------------------|--------|---------|----------|
| ▼ All Events         | 40000  | 100.00% | 100.00%  |
| ▼ P1                 | 10325  | 25.81%  | 25.81%   |
| ▼ P2                 | 9537   | 23.84%  | 92.37%   |
| ▼ P3                 | 9515   | 23.79%  | 99.77%   |
| Q1-UR DP             | 4      | 0.01%   | 0.04%    |
| Q1-UL SNCA only      | 48     | 0.12%   | 0.50%    |
| Q1-LL                | 9395   | 23.49%  | 98.74%   |
| Q1-LR OTX2-LMX1 only | 68     | 0.17%   | 0.71%    |

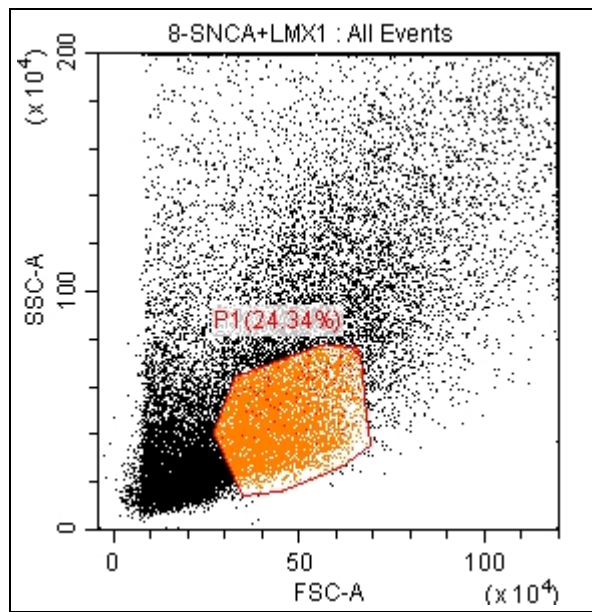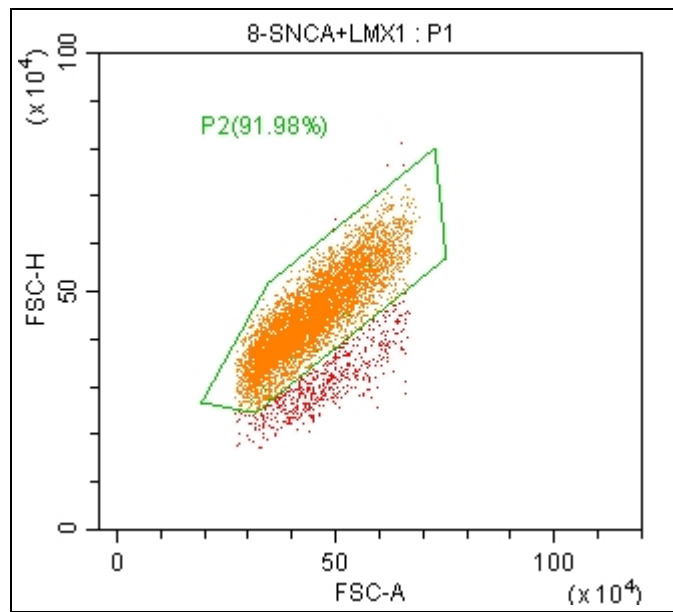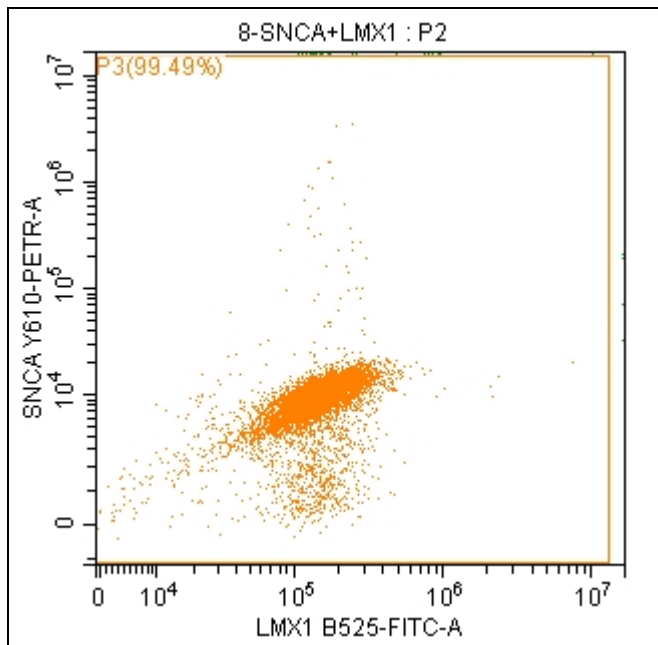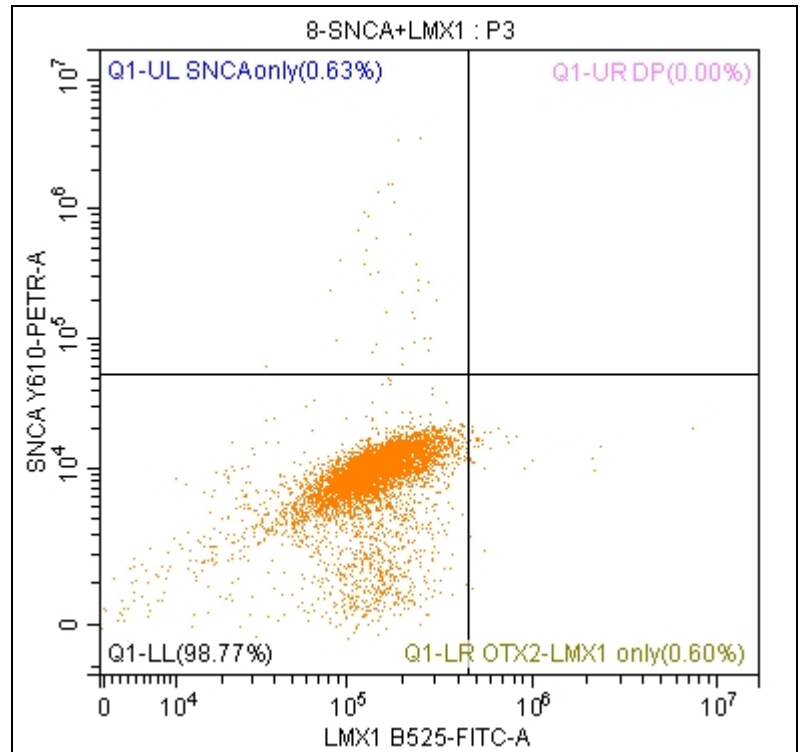

Tube Name: 8-SNCA+LMX1

Sample ID:

| Population             | Events | % Total | % Parent |
|------------------------|--------|---------|----------|
| ▼ ● All Events         | 26328  | 100.00% | 100.00%  |
| ▼ ● P1                 | 6408   | 24.34%  | 24.34%   |
| ▼ ● P2                 | 5894   | 22.39%  | 91.98%   |
| ▼ ● P3                 | 5864   | 22.27%  | 99.49%   |
| ● Q1-UR DP             | 0      | 0.00%   | 0.00%    |
| ● Q1-UL SNCA only      | 37     | 0.14%   | 0.63%    |
| ⊗ Q1-LL                | 5792   | 22.00%  | 98.77%   |
| ● Q1-LR OTX2-LMX1 only | 35     | 0.13%   | 0.60%    |
