# Supplementary material for: Identification of an early subset of cerebellar nuclei neurons in mice
Source: eLife journal article supplement (doi:10.7554/elife.93778), 2024-04-08
Supplement: fig3-data2 [file elife-93778-fig3-data2-v1.zip]

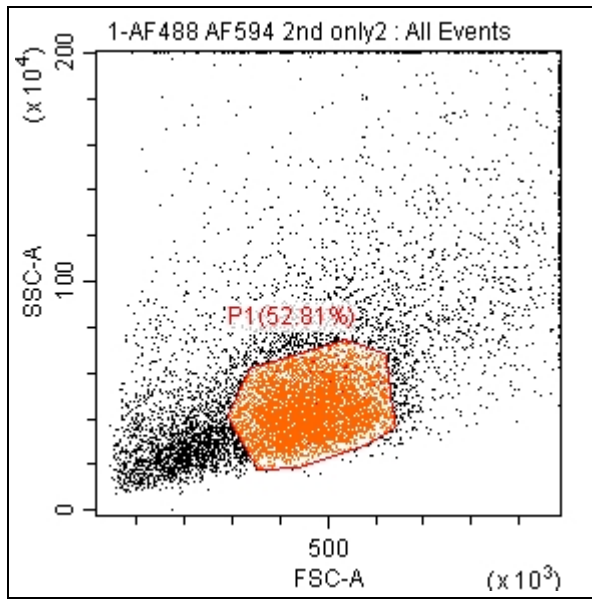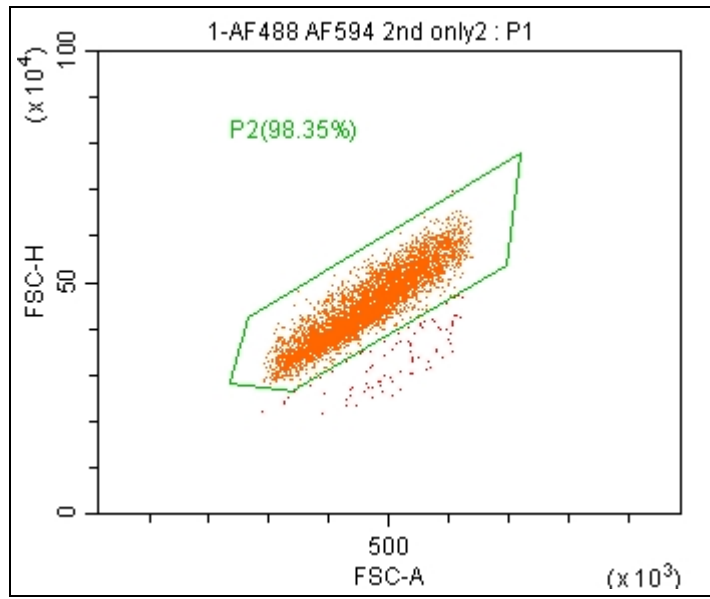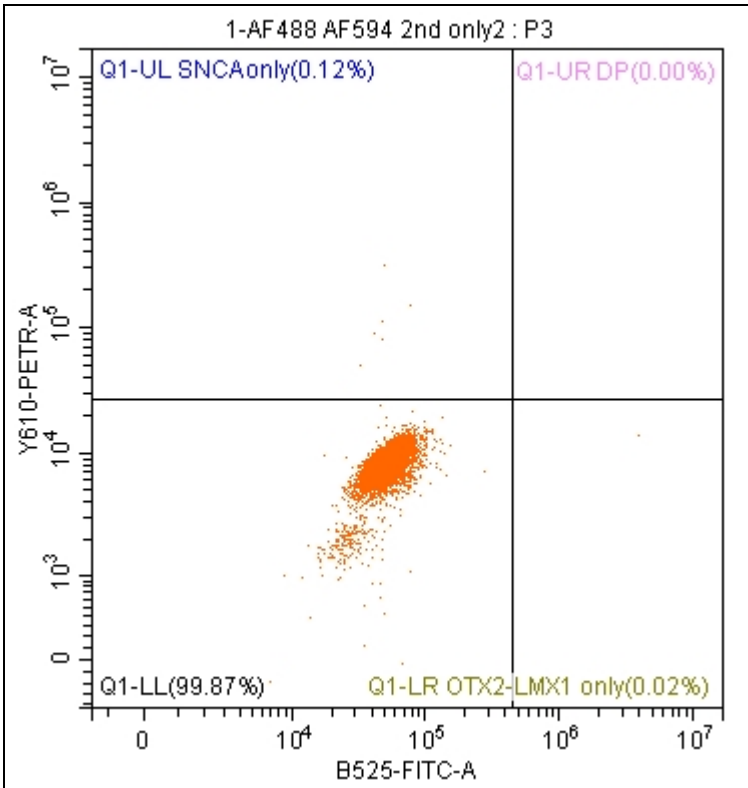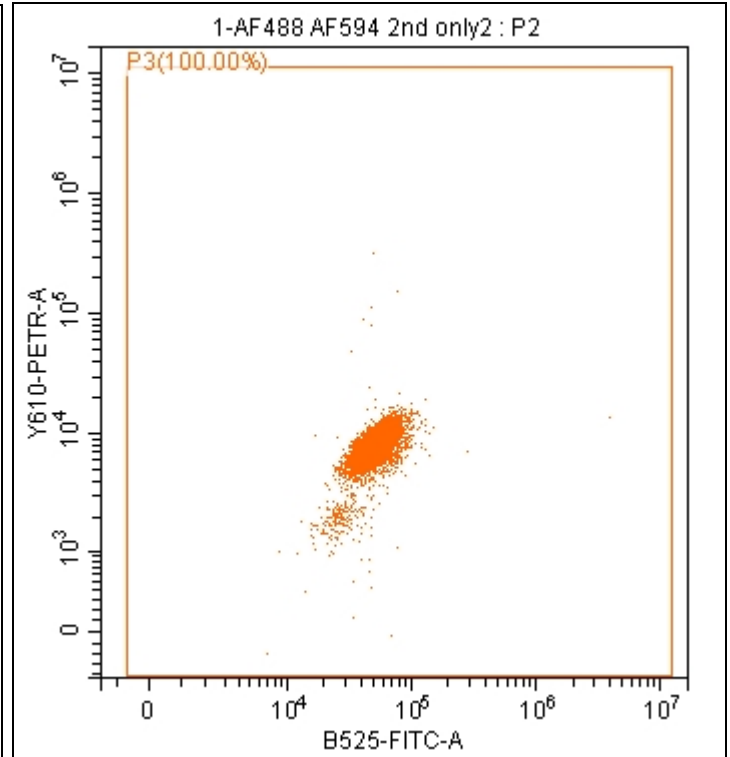

Tube Name: 1-AF488 AF594 2nd only2

Sample ID:

| Population             | Events | % Total | % Parent |
|------------------------|--------|---------|----------|
| ▼ ● All Events         | 10000  | 100.00% | 100.00%  |
| ▼ ● P1                 | 5281   | 52.81%  | 52.81%   |
| ▼ ● P2                 | 5194   | 51.94%  | 98.35%   |
| ▼ ● P3                 | 5194   | 51.94%  | 100.00%  |
| ● Q1-UR DP             | 0      | 0.00%   | 0.00%    |
| ● Q1-UL SNCA only      | 6      | 0.06%   | 0.12%    |
| ⊗ Q1-LL                | 5187   | 51.87%  | 99.87%   |
| ● Q1-LR OTX2-LMX1 only | 1      | 0.01%   | 0.02%    |

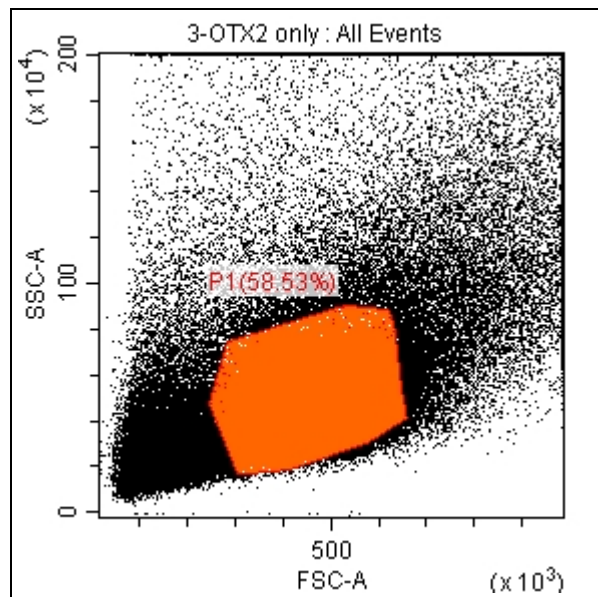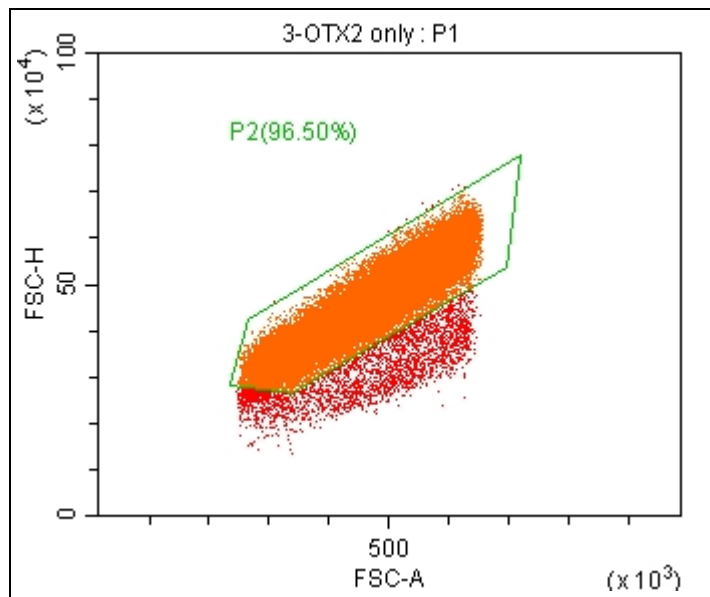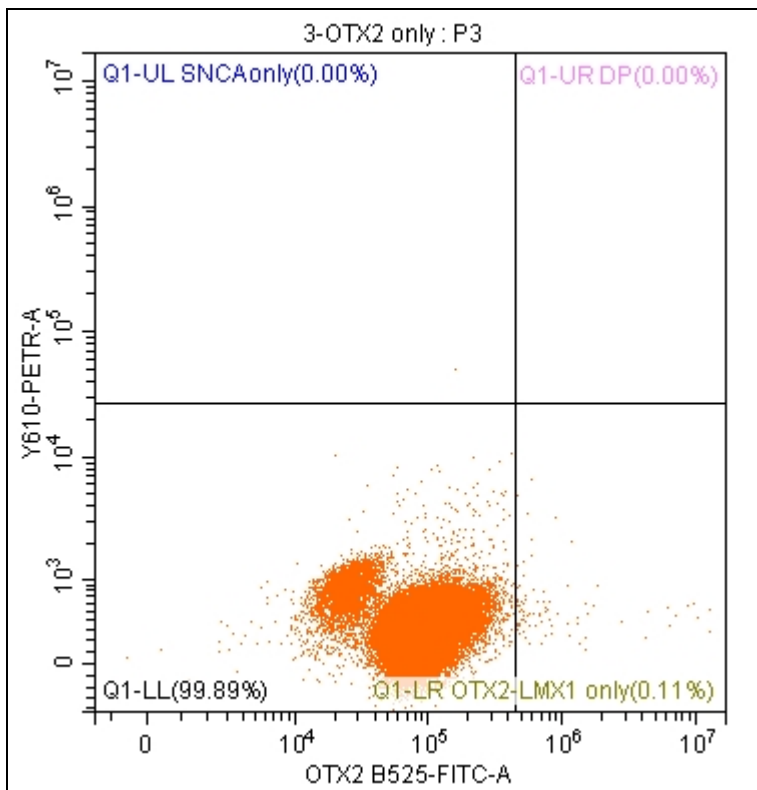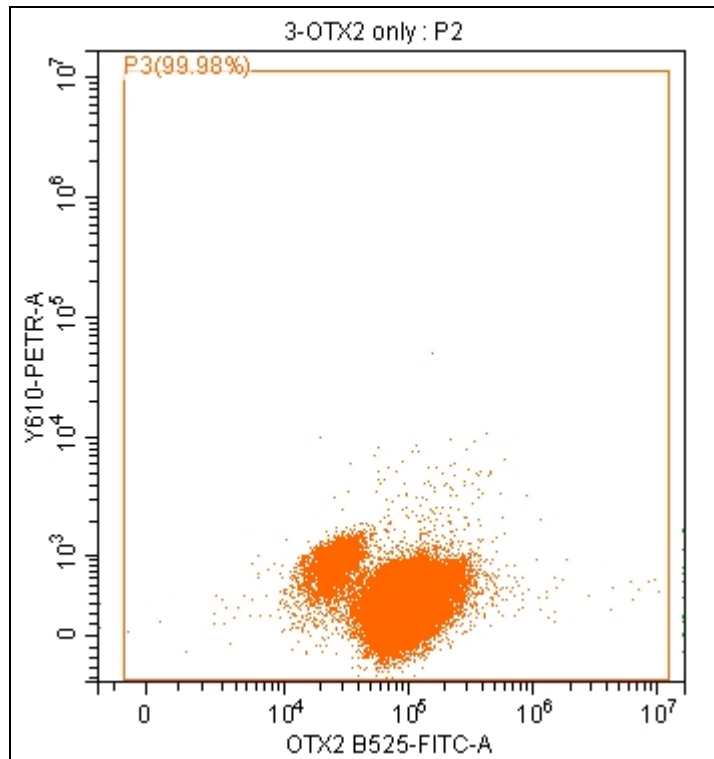

Tube Name: 3-OTX2 only

Sample ID:

| Population             | Events | % Total | % Parent |
|------------------------|--------|---------|----------|
| ▼ ● All Events         | 140000 | 100.00% | 100.00%  |
| ▼ ● P1                 | 81935  | 58.53%  | 58.53%   |
| ▼ ● P2                 | 79070  | 56.48%  | 96.50%   |
| ▼ ● P3                 | 79055  | 56.47%  | 99.98%   |
| ● Q1-UR DP             | 0      | 0.00%   | 0.00%    |
| ● Q1-UL SNCA only      | 1      | 0.00%   | 0.00%    |
| ⊗ Q1-LL                | 78970  | 56.41%  | 99.89%   |
| ● Q1-LR OTX2-LMX1 only | 84     | 0.06%   | 0.11%    |

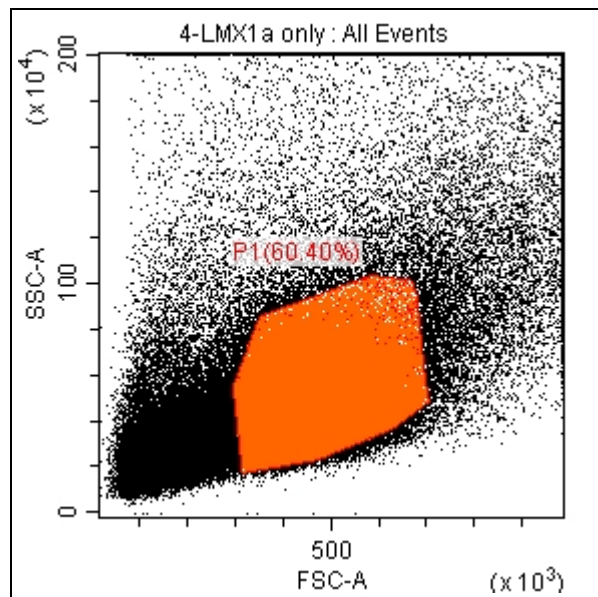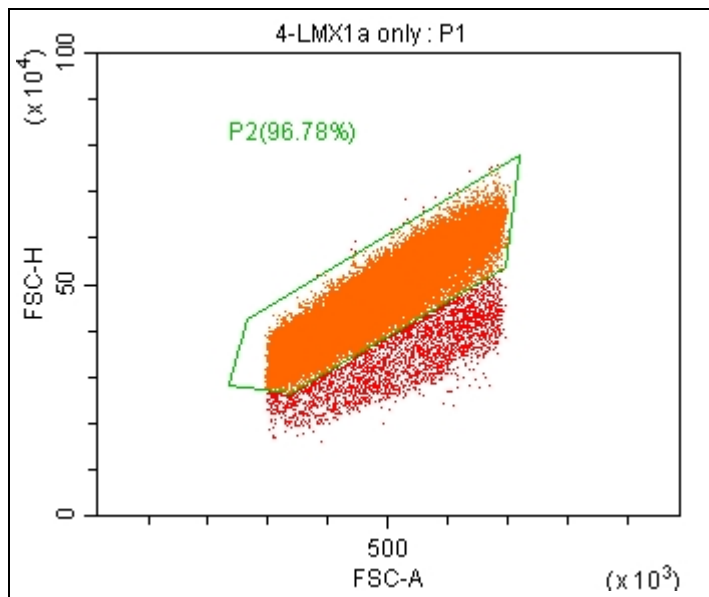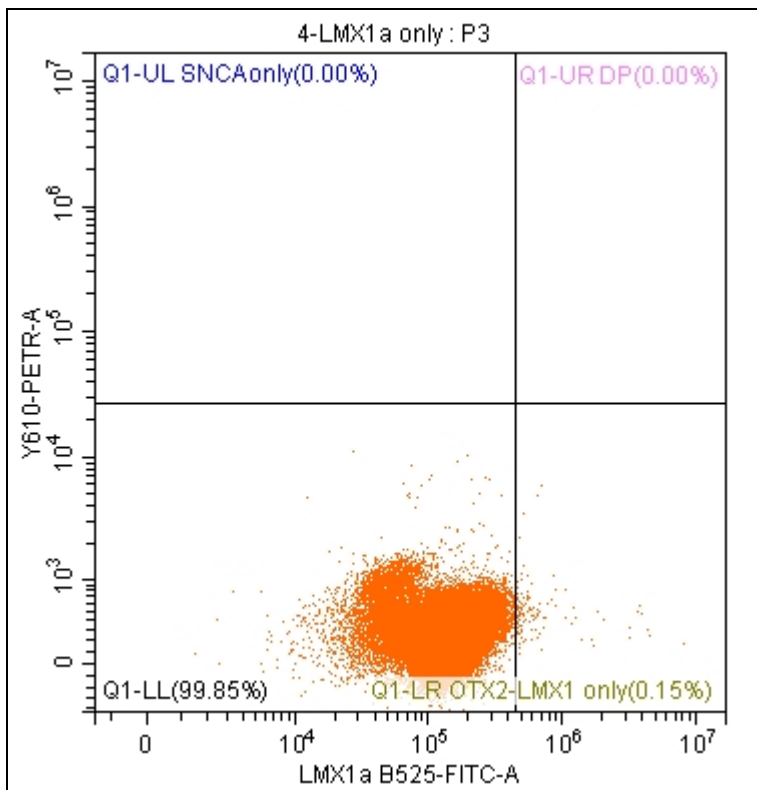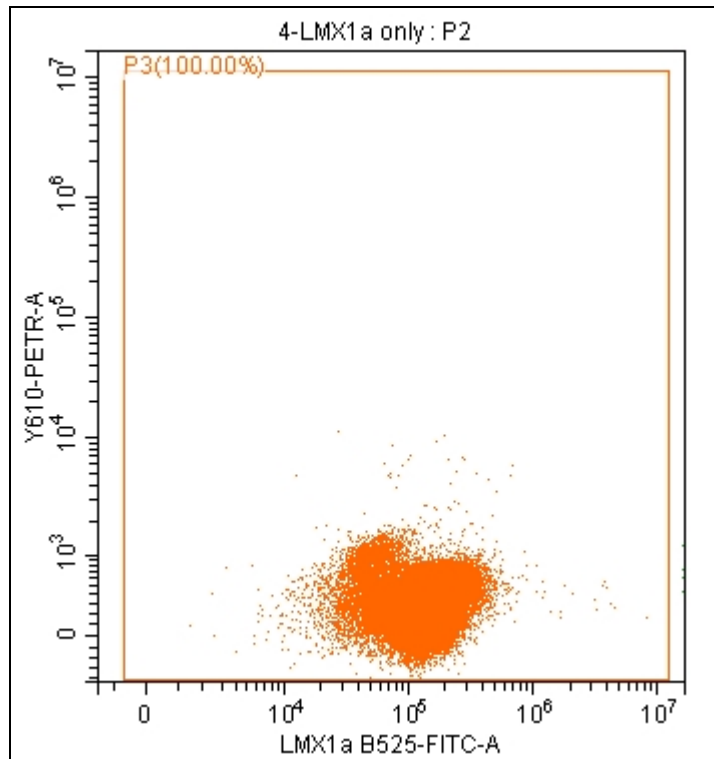

Tube Name: 4-LMX1a only

Sample ID:

| Population             | Events | % Total | % Parent |
|------------------------|--------|---------|----------|
| ▼ ● All Events         | 140000 | 100.00% | 100.00%  |
| ▼ ● P1                 | 84557  | 60.40%  | 60.40%   |
| ▼ ● P2                 | 81836  | 58.45%  | 96.78%   |
| ▼ ● P3                 | 81832  | 58.45%  | 100.00%  |
| ● Q1-UR DP             | 0      | 0.00%   | 0.00%    |
| ● Q1-UL SNCA only      | 0      | 0.00%   | 0.00%    |
| ⊗ Q1-LL                | 81710  | 58.36%  | 99.85%   |
| ● Q1-LR OTX2-LMX1 only | 122    | 0.09%   | 0.15%    |

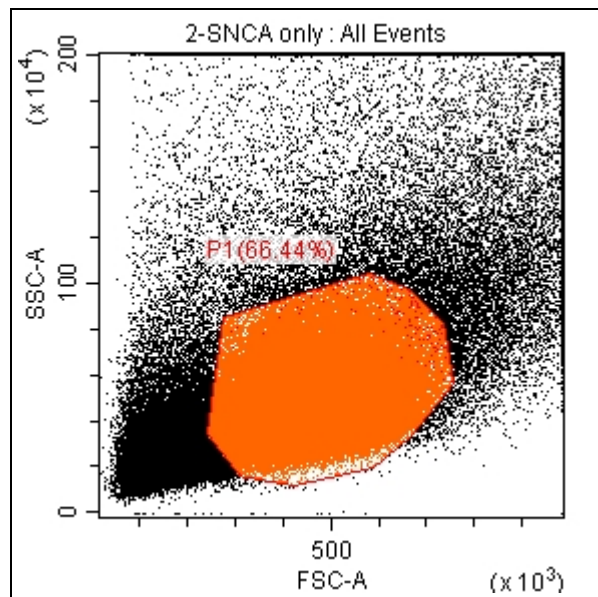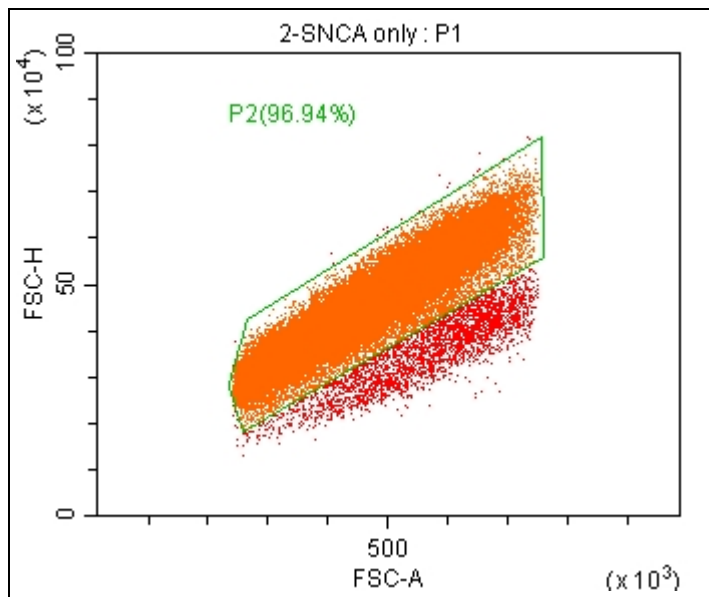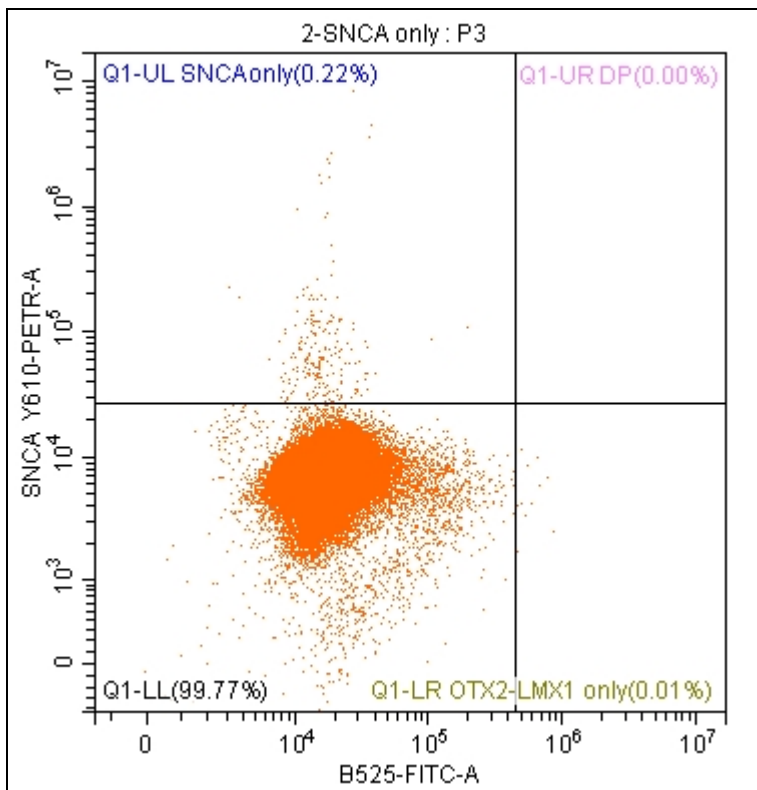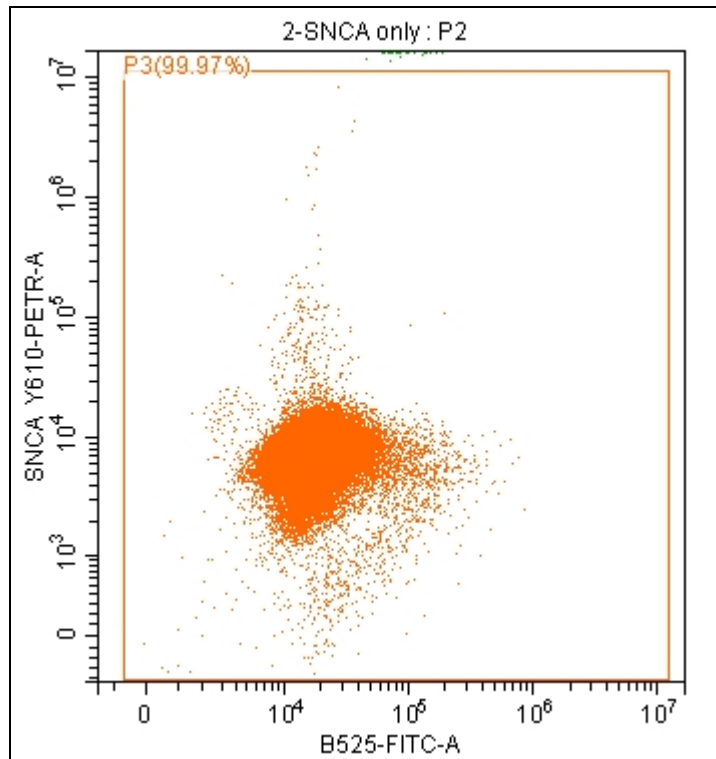

Tube Name: 2-SNCA only

Sample ID:

| Population             | Events | % Total | % Parent |
|------------------------|--------|---------|----------|
| ▼ ● All Events         | 150000 | 100.00% | 100.00%  |
| ▼ ● P1                 | 99658  | 66.44%  | 66.44%   |
| ▼ ● P2                 | 96606  | 64.40%  | 96.94%   |
| ▼ ● P3                 | 96581  | 64.39%  | 99.97%   |
| ● Q1-UR DP             | 0      | 0.00%   | 0.00%    |
| ● Q1-UL SNCA only      | 214    | 0.14%   | 0.22%    |
| ⊗ Q1-LL                | 96356  | 64.24%  | 99.77%   |
| ● Q1-LR OTX2-LMX1 only | 11     | 0.01%   | 0.01%    |

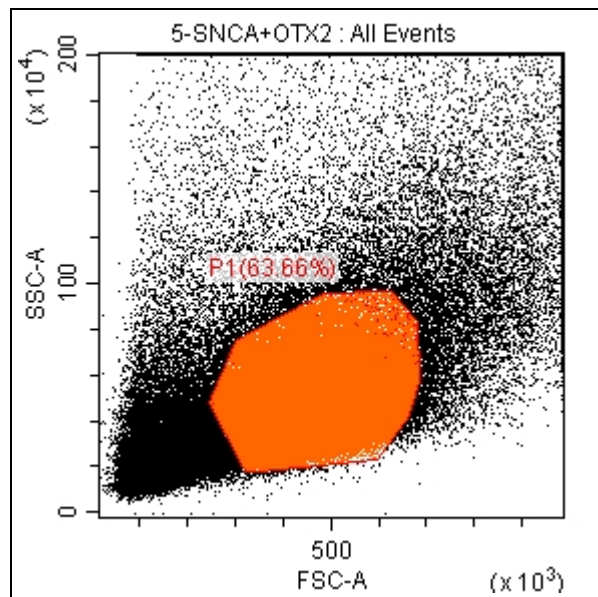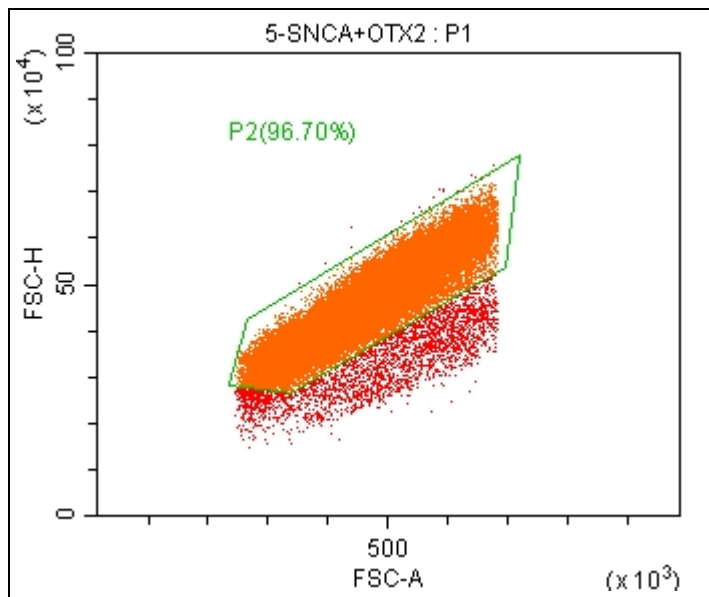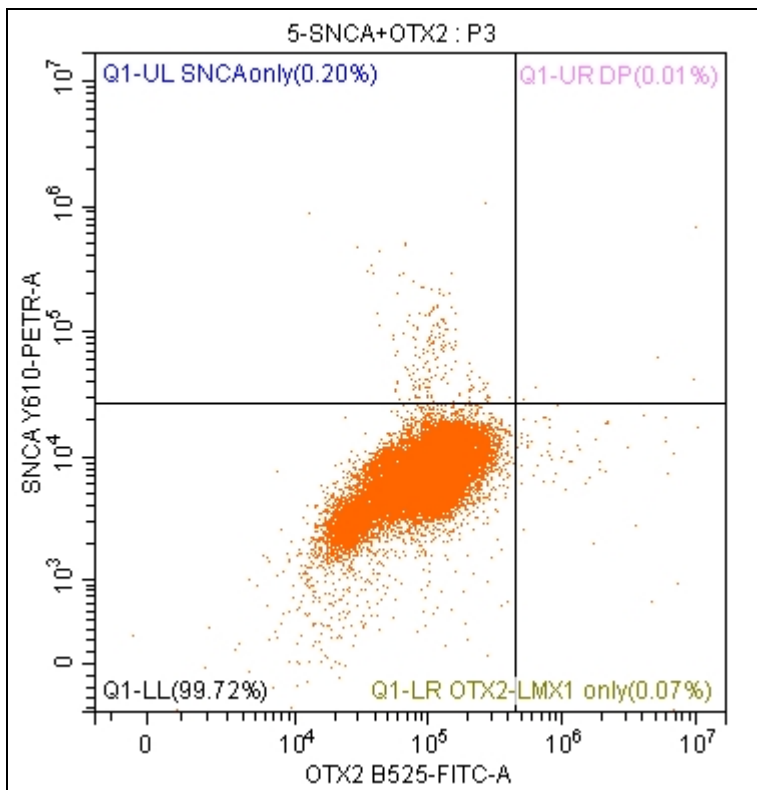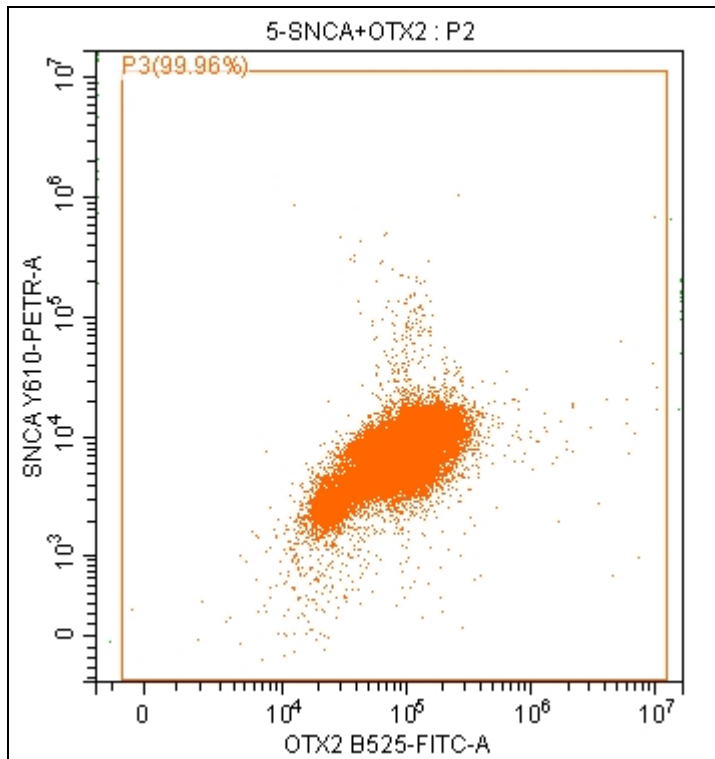

Tube Name: 5-SNCA+OTX2

Sample ID:

| Population             | Events | % Total | % Parent |
|------------------------|--------|---------|----------|
| ▼ ● All Events         | 140000 | 100.00% | 100.00%  |
| ▼ ● P1                 | 89122  | 63.66%  | 63.66%   |
| ▼ ● P2                 | 86178  | 61.56%  | 96.70%   |
| ▼ ● P3                 | 86144  | 61.53%  | 99.96%   |
| ● Q1-UR DP             | 5      | 0.00%   | 0.01%    |
| ● Q1-UL SNCA only      | 176    | 0.13%   | 0.20%    |
| ⊗ Q1-LL                | 85900  | 61.36%  | 99.72%   |
| ● Q1-LR OTX2-LMX1 only | 63     | 0.05%   | 0.07%    |



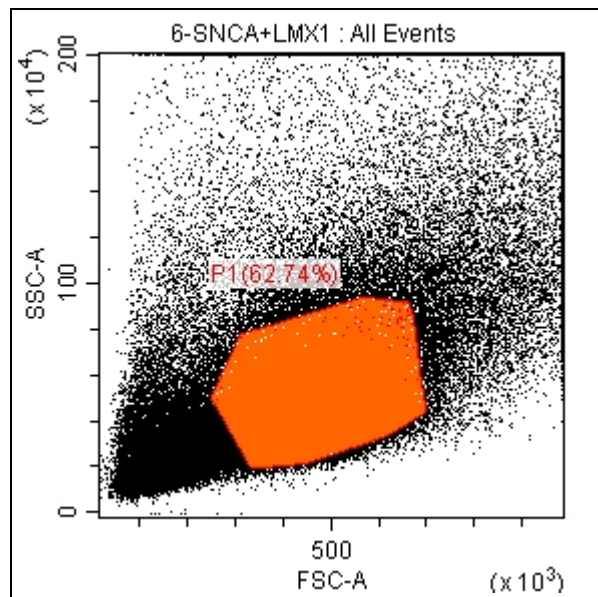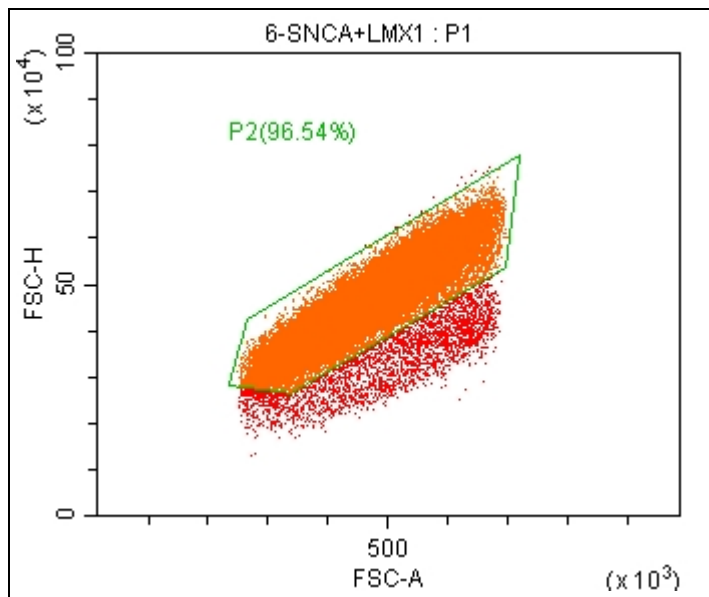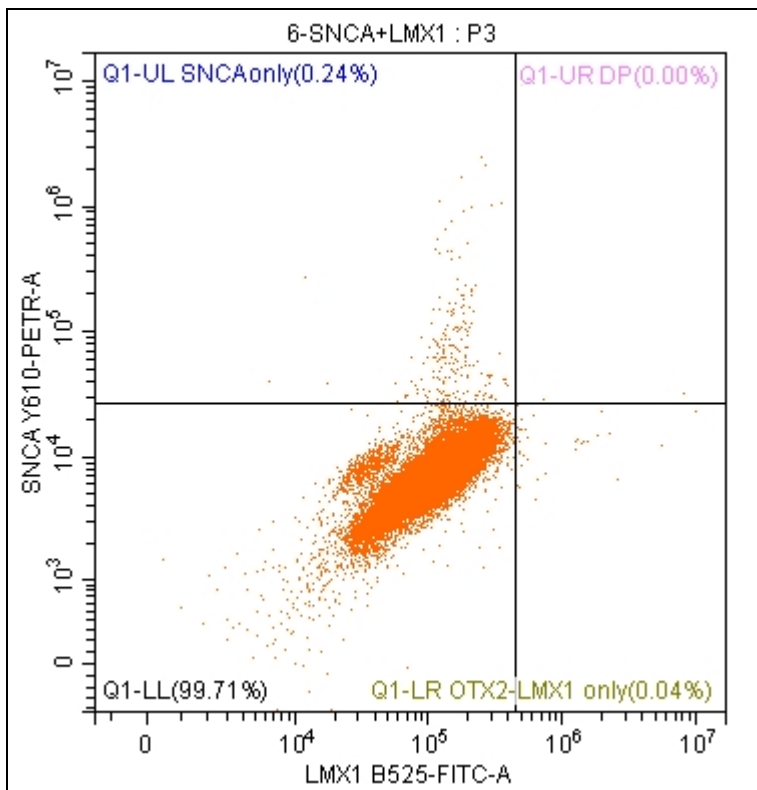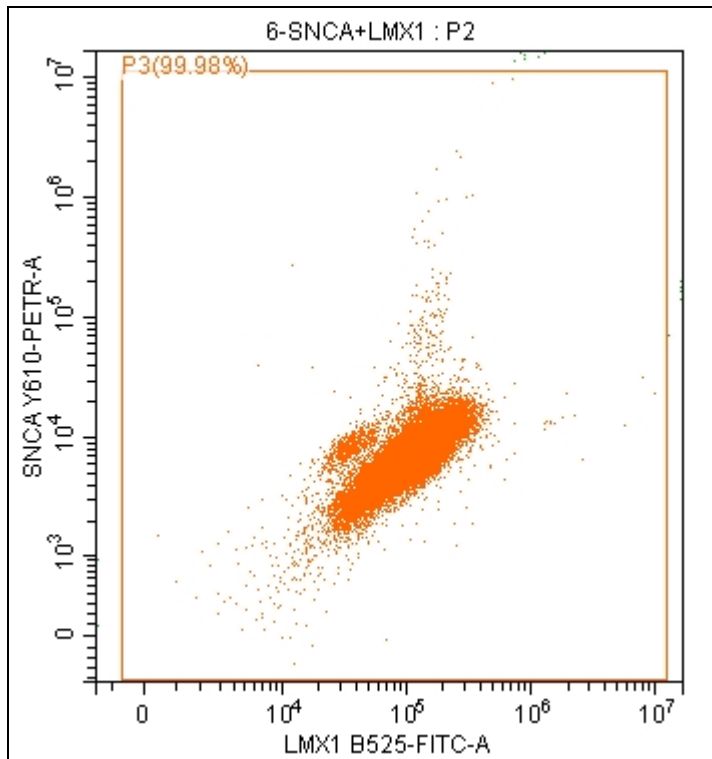

Tube Name: 6-SNCA+LMX1

Sample ID:

| Population             | Events | % Total | % Parent |
|------------------------|--------|---------|----------|
| ▼ ● All Events         | 140000 | 100.00% | 100.00%  |
| ▼ ● P1                 | 87840  | 62.74%  | 62.74%   |
| ▼ ● P2                 | 84801  | 60.57%  | 96.54%   |
| ▼ ● P3                 | 84786  | 60.56%  | 99.98%   |
| ● Q1-UR DP             | 4      | 0.00%   | 0.00%    |
| ● Q1-UL SNCA only      | 202    | 0.14%   | 0.24%    |
| ⊗ Q1-LL                | 84542  | 60.39%  | 99.71%   |
| ● Q1-LR OTX2-LMX1 only | 38     | 0.03%   | 0.04%    |
